# Supplementary material for: Lahar events in the last 2,000 years from Vesuvius eruptions. Part 3: Hazard assessment over the Campanian Plain
Source: Copernicus journal article supplement (doi:10.5194/egusphere-2023-1295), 2023-07-18
Supplement: Supplementary file 1 [file egusphere-2023-1295-supplement.pdf]

## Supplementary Material

### 1. Sensitivity analysis for the Total Grain Size Distribution (TGSD)

In this supplementary material we present the results of an analysis on the effects of the TGDS on lahar dynamics. We take as reference simulation one of the simulations used in the hazard study, for which the initial TGSD is defined as the linear combination of two Weibull distributions with a weight  $p=0.339$ . We then performed 5 simulations varying the weight  $p$  from 0 (resulting in the finest-grain size Weibull only) to 1 (resulting in the coarsest-grain size Weibull only). The different TGSDs are presented in Fig. SM1.

The corresponding simulated results are given in the following figures:

- deposit thickness after 24 hours from the flow onset in Fig. SM2;
- maximum flow thickness during 24 hours from the flow onset in Fig. SM3;
- maximum dynamic pressure with a flow thickness of at least 0.1m during 24 hours from the flow onset in Fig. SM4;
- maximum dynamic pressure with a flow thickness of at least 0.5 m during 24 hours from the flow onset in Fig. SM5;
- maximum dynamic pressure with a flow thickness of at least 1m during 24 hours from the flow onset in Fig. SM6.

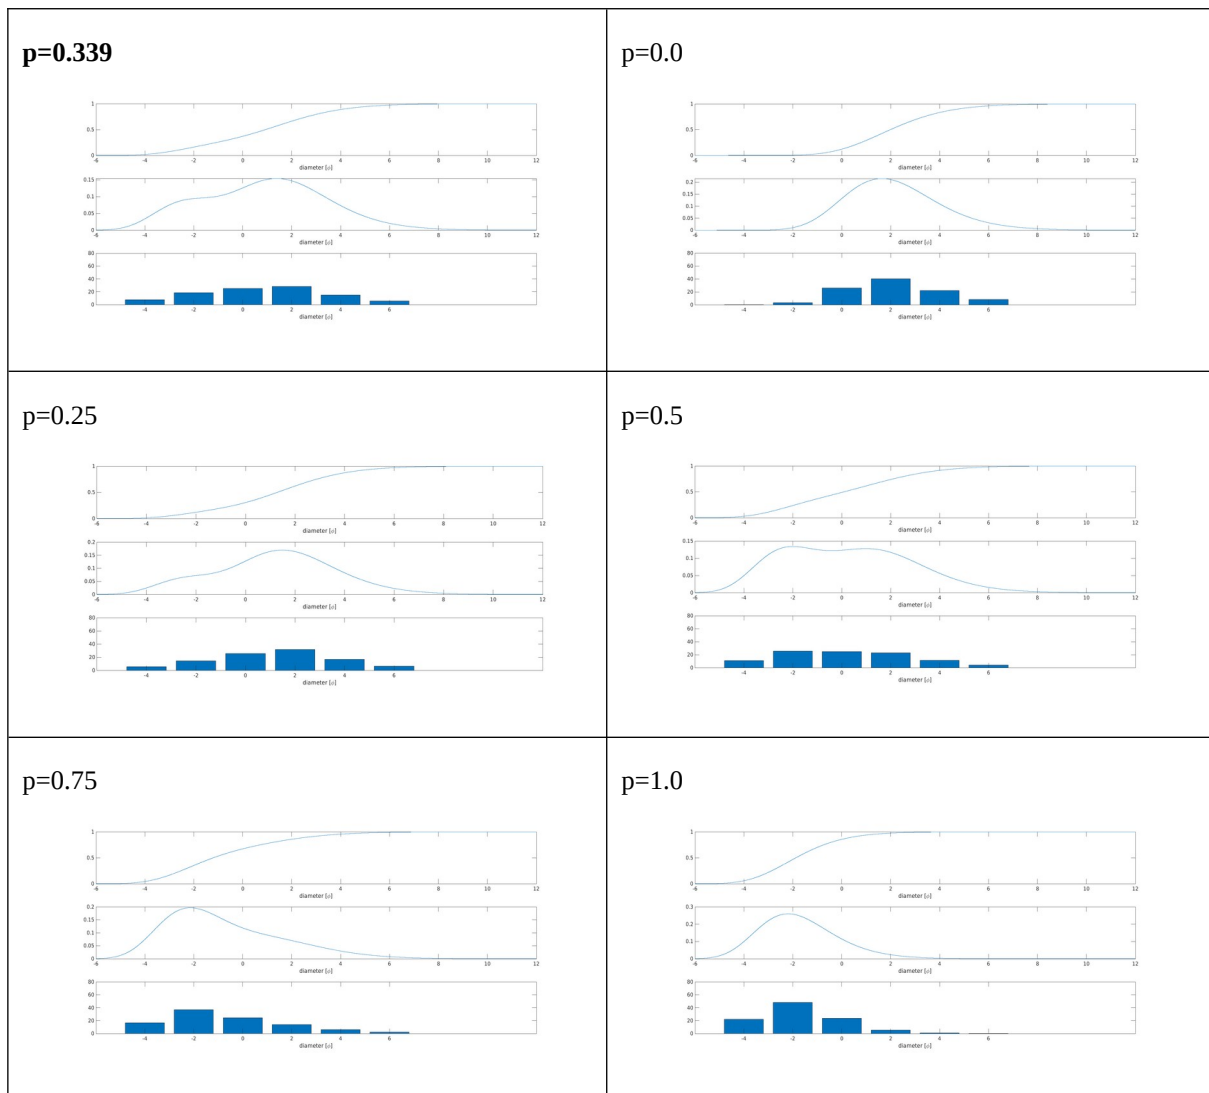

Figure SM1. TGSDs investigated: (top-left)  $p=0.339$  – reference simulation; (top-right)  $p=0.0$ ; (middle-left)  $p=0.25$ ; (middle-right)  $p=0.5$ ; (bottom-left)  $p=0.75$ ; (bottom-right)  $p=1.0$ .

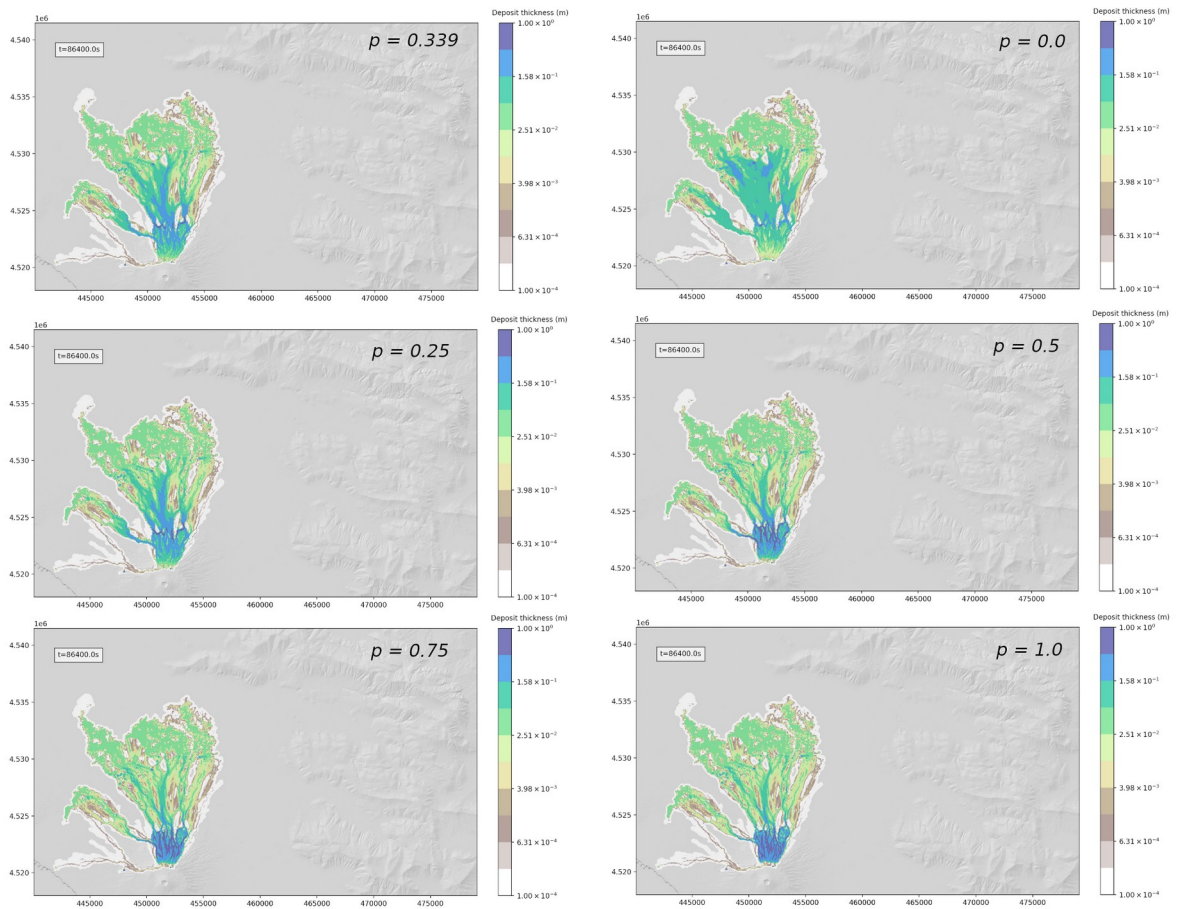

Figure SM2. Flow thickness 24h from the mobilization of the lahar for: (top-left)  $p=0.339$  – reference simulation; (top-right)  $p=0.0$ ; (middle-left)  $p=0.25$ ; (middle-right)  $p=0.5$ ; (bottom-left)  $p=0.75$ ; (bottom-right)  $p=1.0$ .

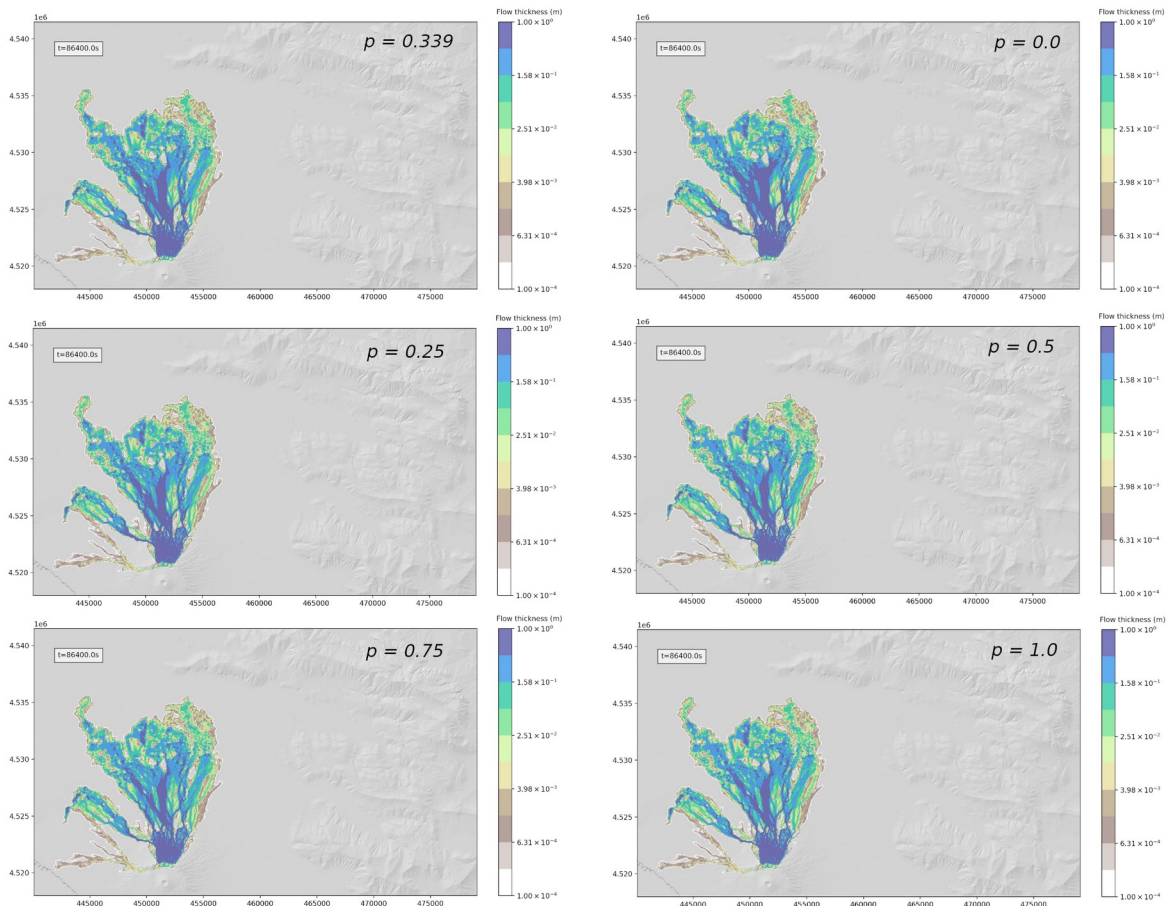

Figure SM3. Maximum flow thickness during 24h from the mobilization of the lahar for: (top-left)  $p=0.339$  – reference simulation; (top-right)  $p=0.0$ ; (middle-left)  $p=0.25$ ; (middle-right)  $p=0.5$ ; (bottom-left)  $p=0.75$ ; (bottom-right)  $p=1.0$ .

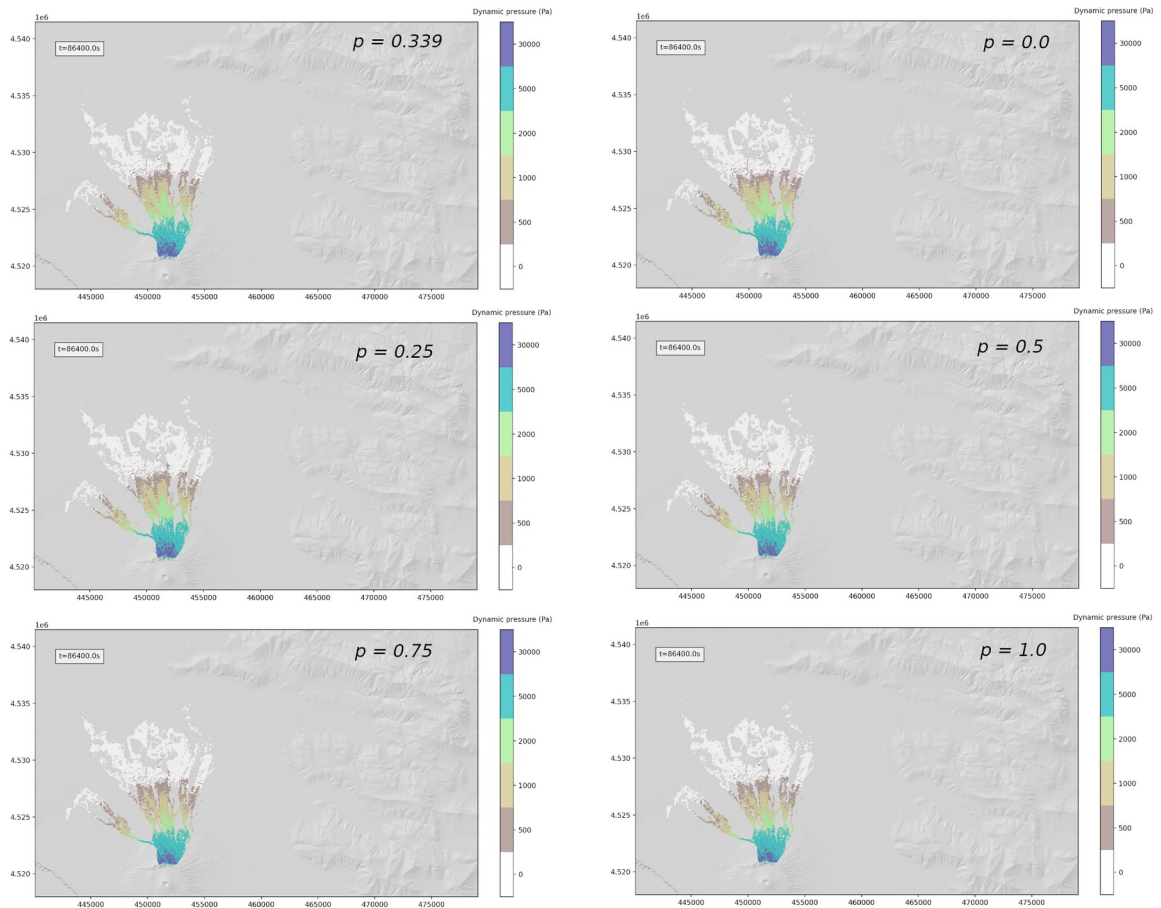

Figure SM4. Maximum dynamic pressure reached, in each pixel, with a flow thickness of at least 0.1m, for: (top-left)  $p=0.339$  – reference simulation; (top-right)  $p=0.0$ ; (middle-left)  $p=0.25$ ; (middle-right)  $p=0.5$ ; (bottom-left)  $p=0.75$ ; (bottom-right)  $p=1.0$ .

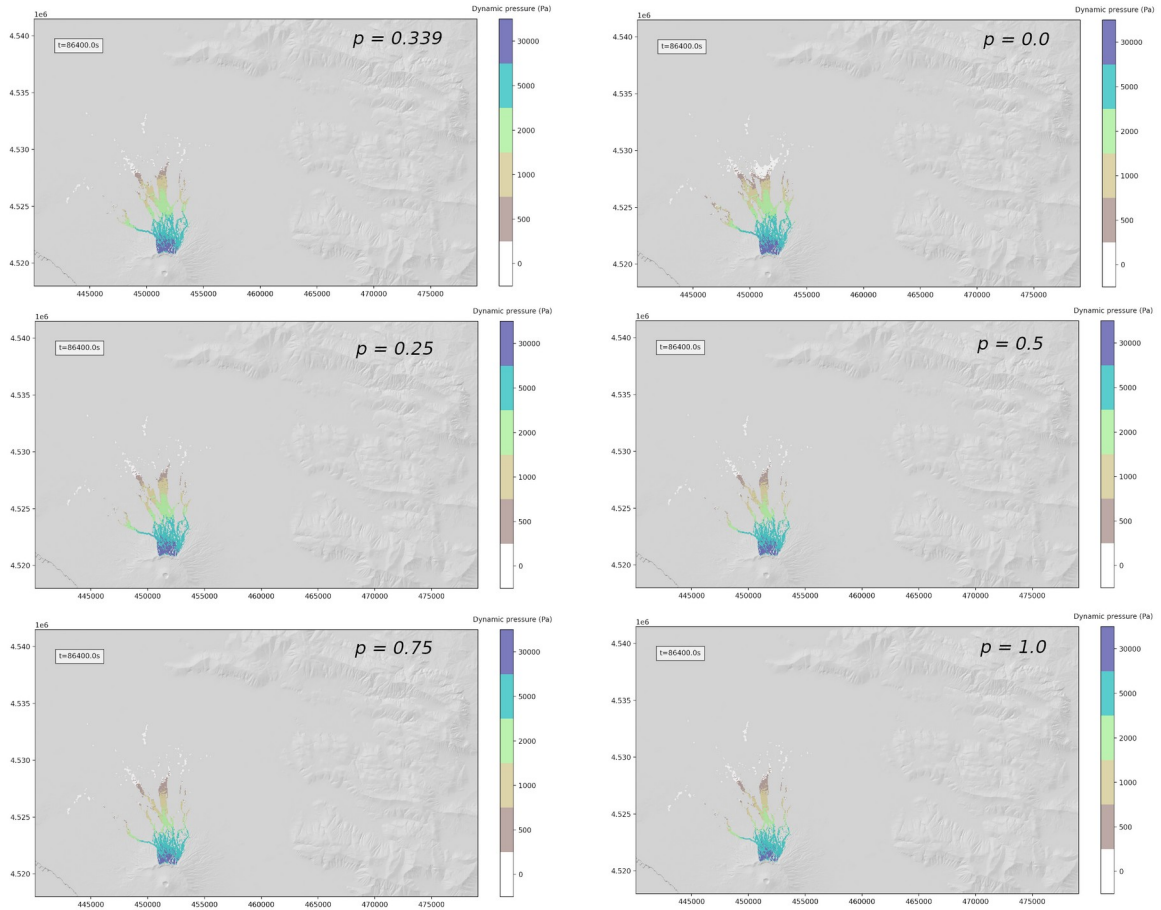

Figure SM5. Maximum dynamic pressure reached, in each pixel, with a flow thickness of at least 0.5m, for: (top-left)  $p=0.339$  – reference simulation; (top-right)  $p=0.0$ ; (middle-left)  $p=0.25$ ; (middle-right)  $p=0.5$ ; (bottom-left)  $p=0.75$ ; (bottom-right)  $p=1.0$ .

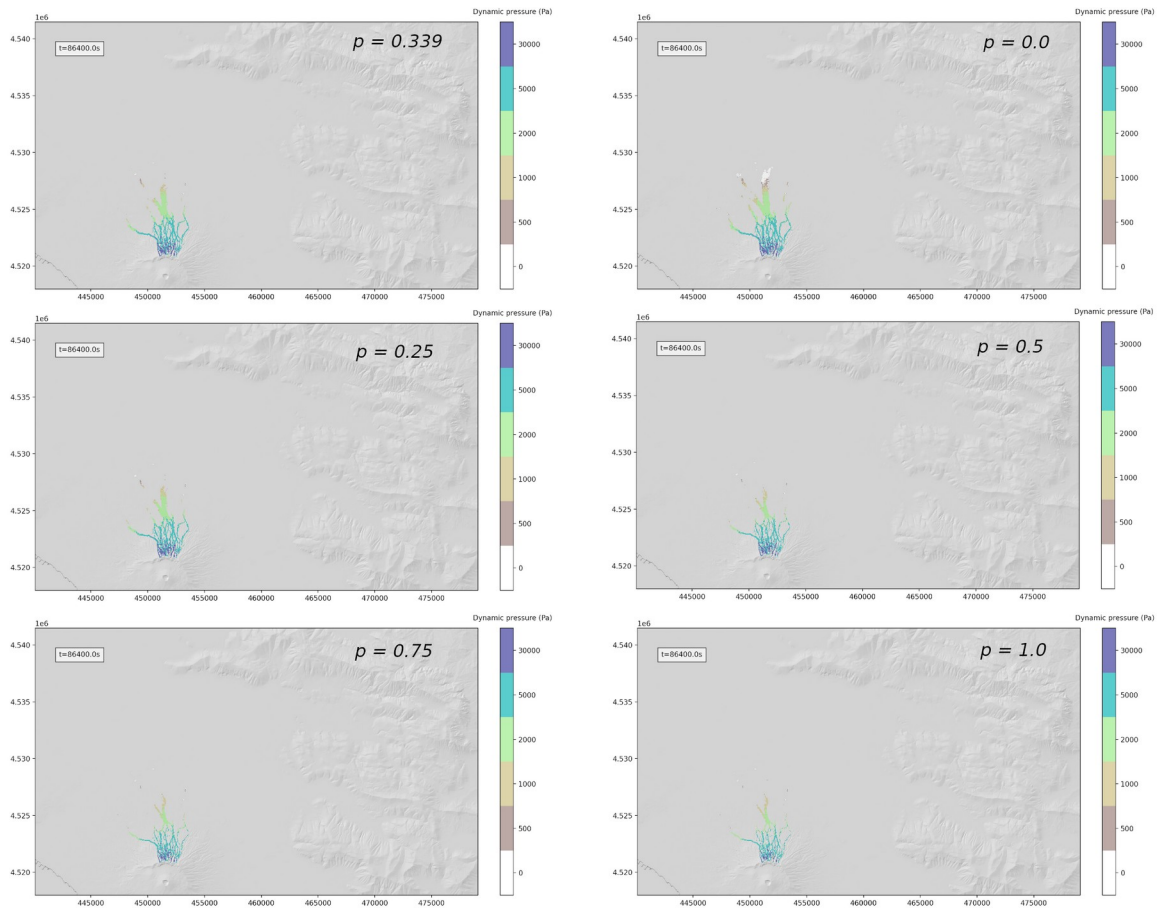

Figure SM6. Maximum dynamic pressure reached, in each pixel, with a flow thickness of at least 1m, for: (top-left)  $p=0.339$  – reference simulation; (top-right)  $p=0.0$ ; (middle-left)  $p=0.25$ ; (middle-right)  $p=0.5$ ; (bottom-left)  $p=0.75$ ; (bottom-right)  $p=1.0$ .

**2. Probability maps for different thresholds in maximum flow thickness, maximum flow thickness hazard maps for different thresholds in probability, and probability maps for joint threshold pairs in flow thickness and dynamic pressure**

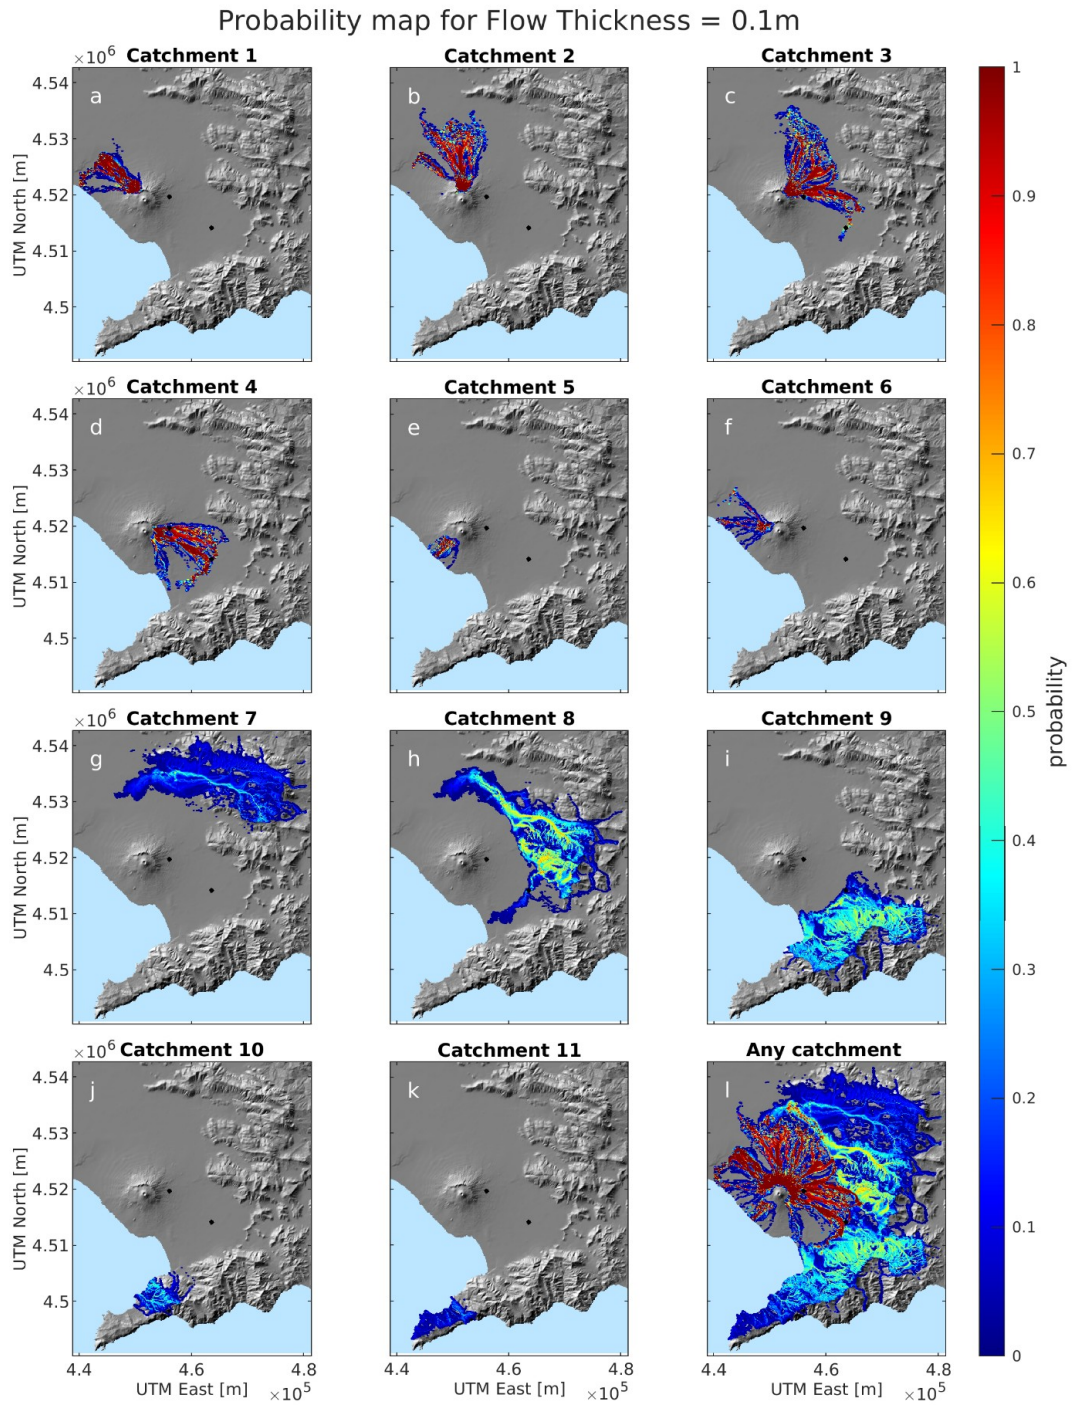

Figure SM7: Probability maps for maximum flow thickness larger than 0.1 m



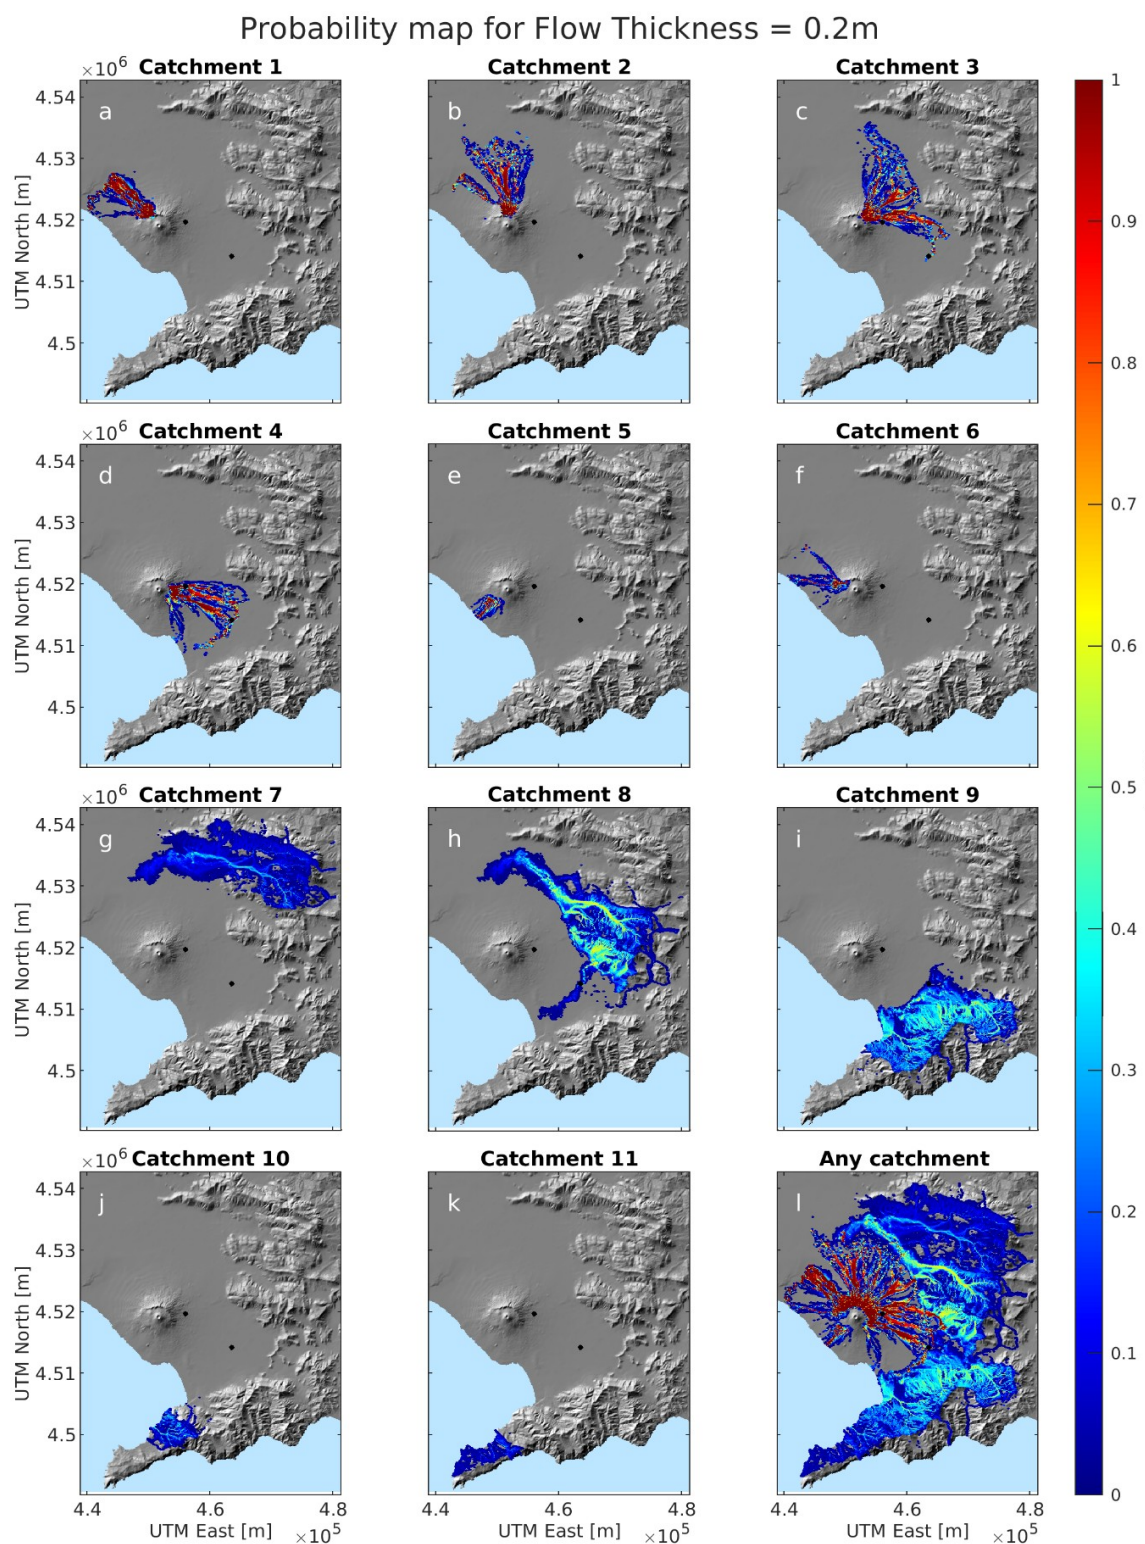

Figure SM8: Probability maps for maximum flow thickness larger than 0.2m

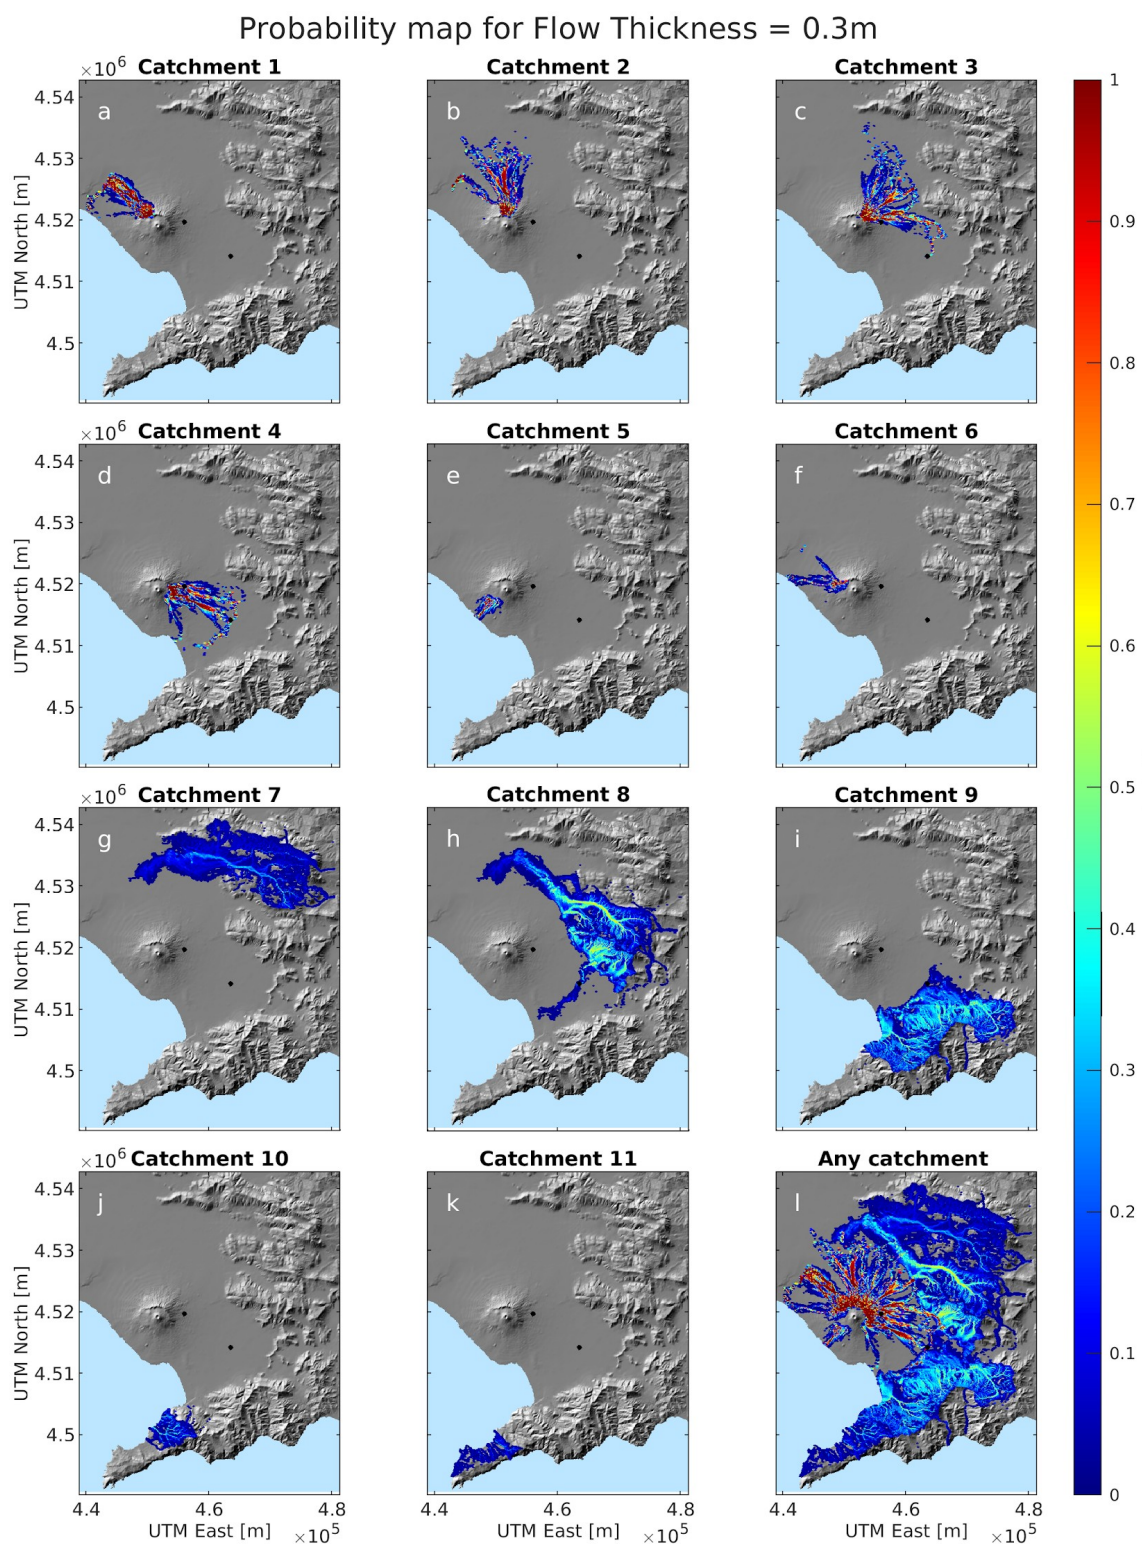

Figure SM9: Probability maps for maximum flow thickness larger than 0.3 m

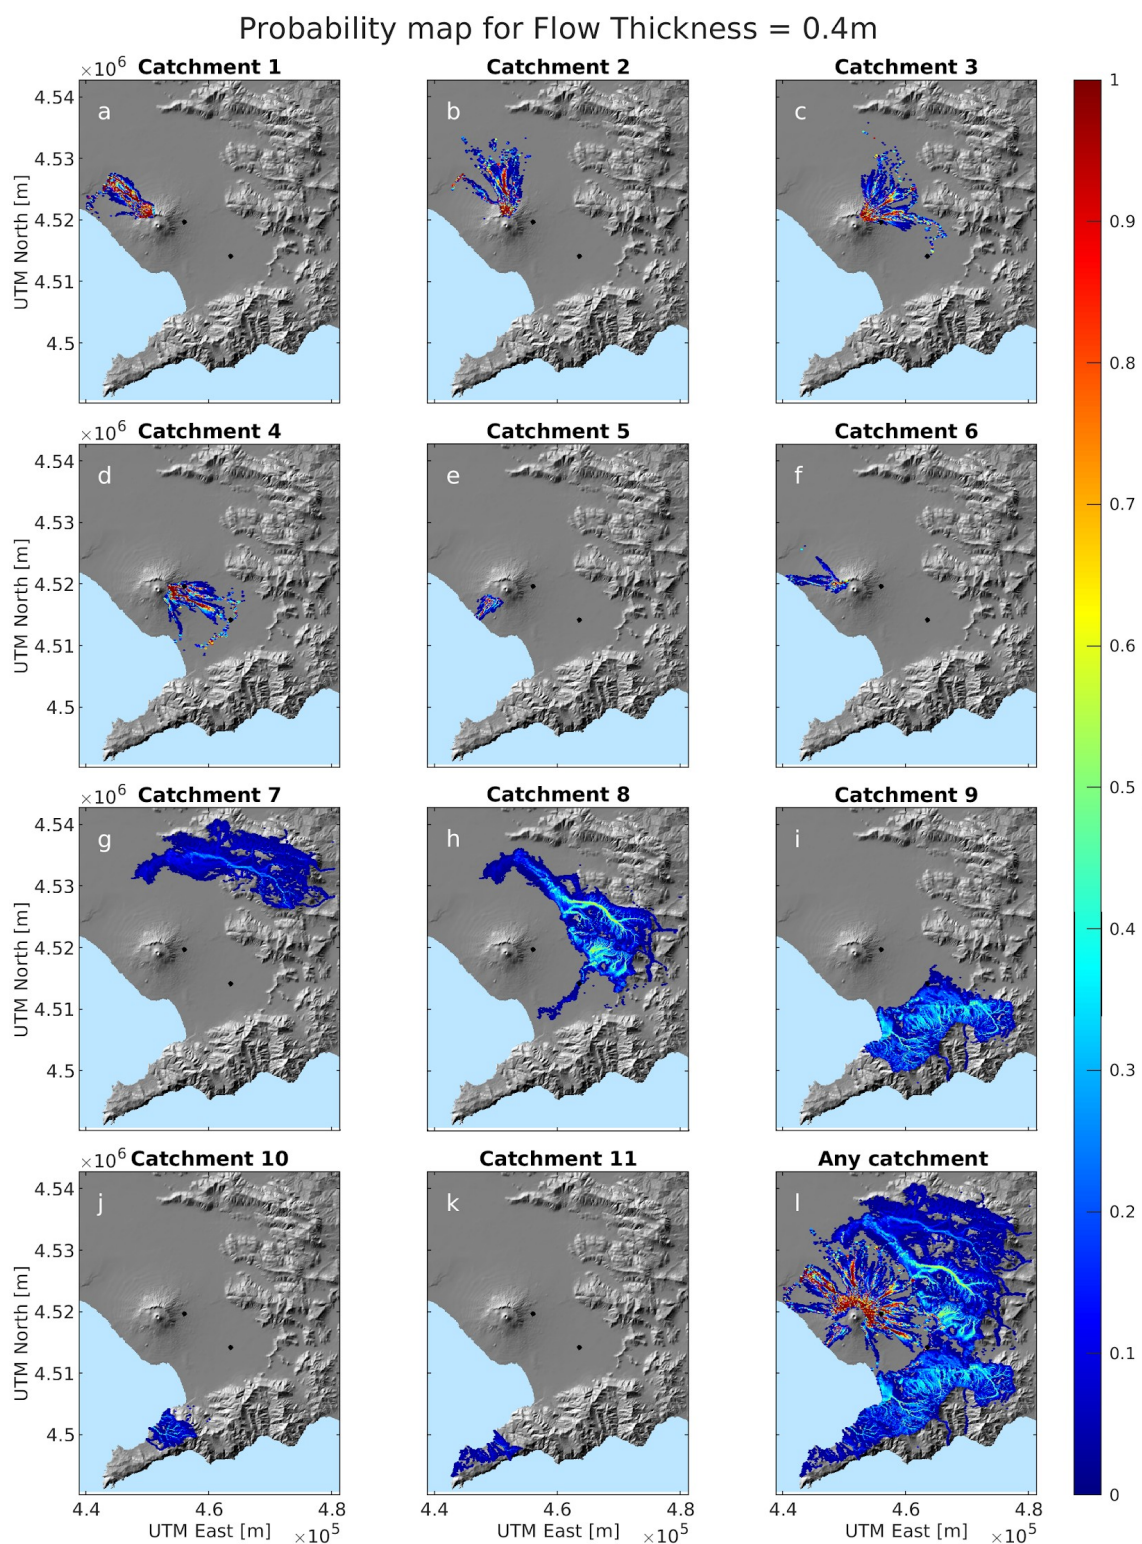

Figure SM10: Probability maps for maximum flow thickness larger than 0.4 m

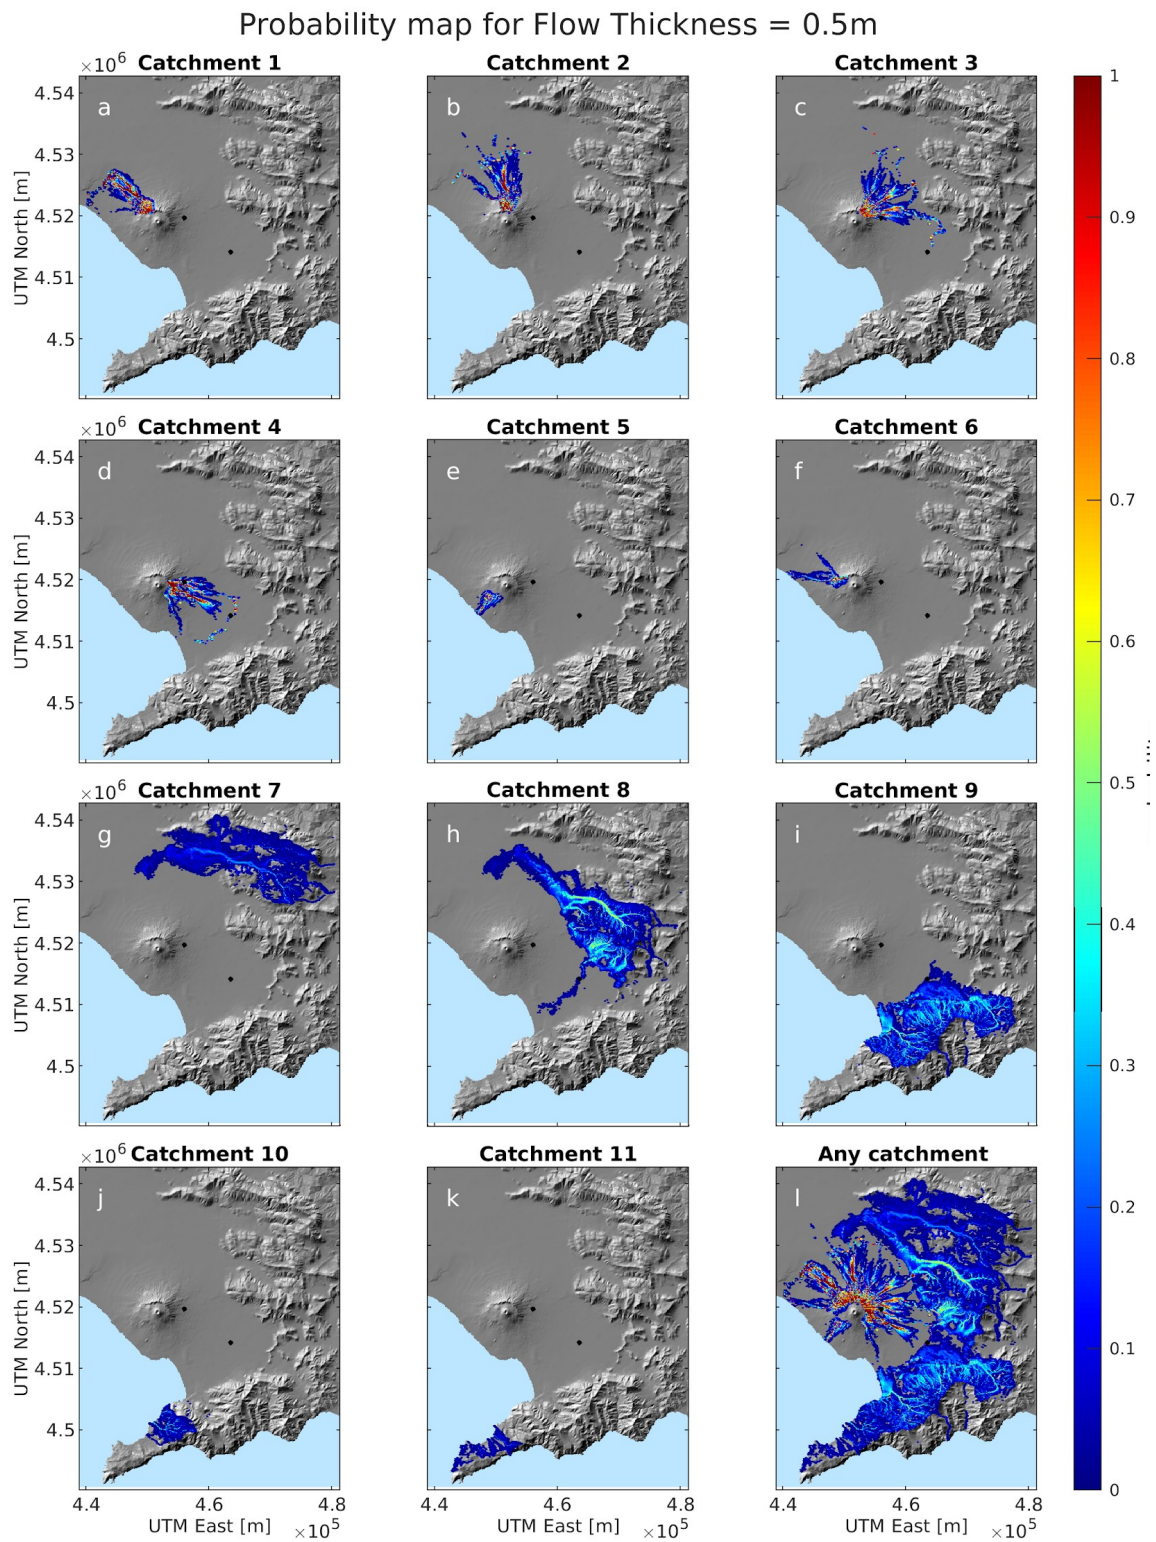

Figure SM11: Probability maps for maximum flow thickness larger than 0.5 m

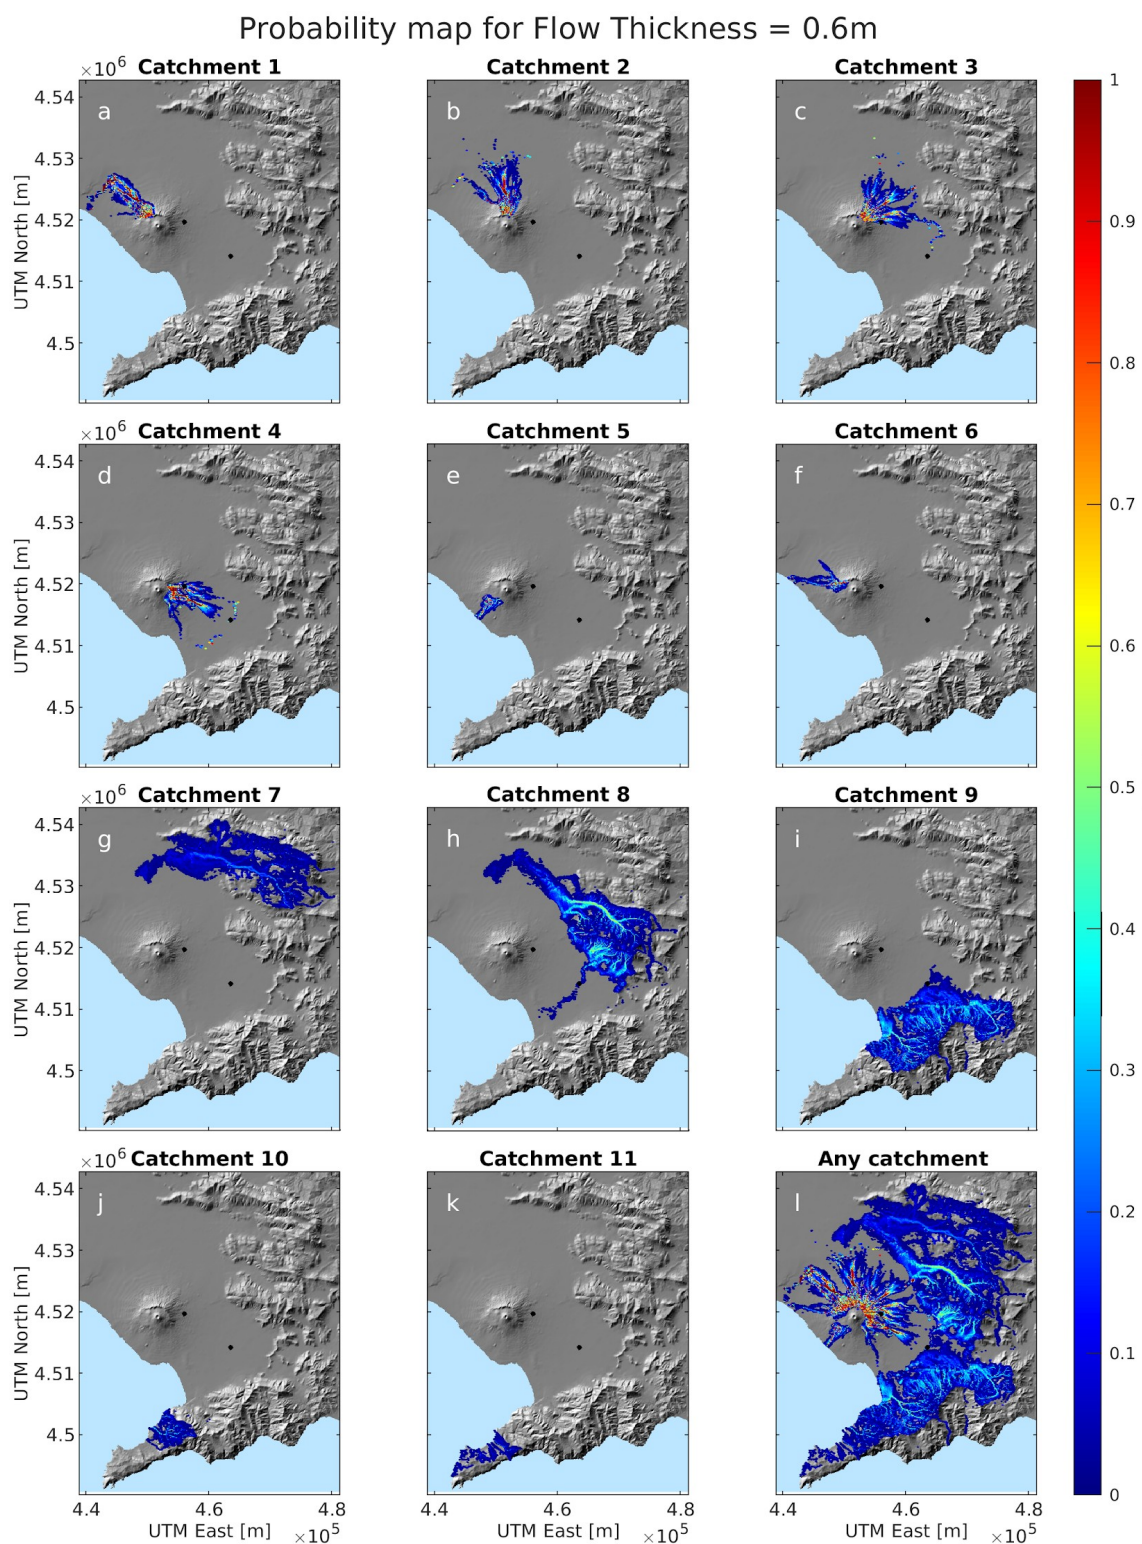

Figure SM12: Probability maps for maximum flow thickness larger than 0.6 m

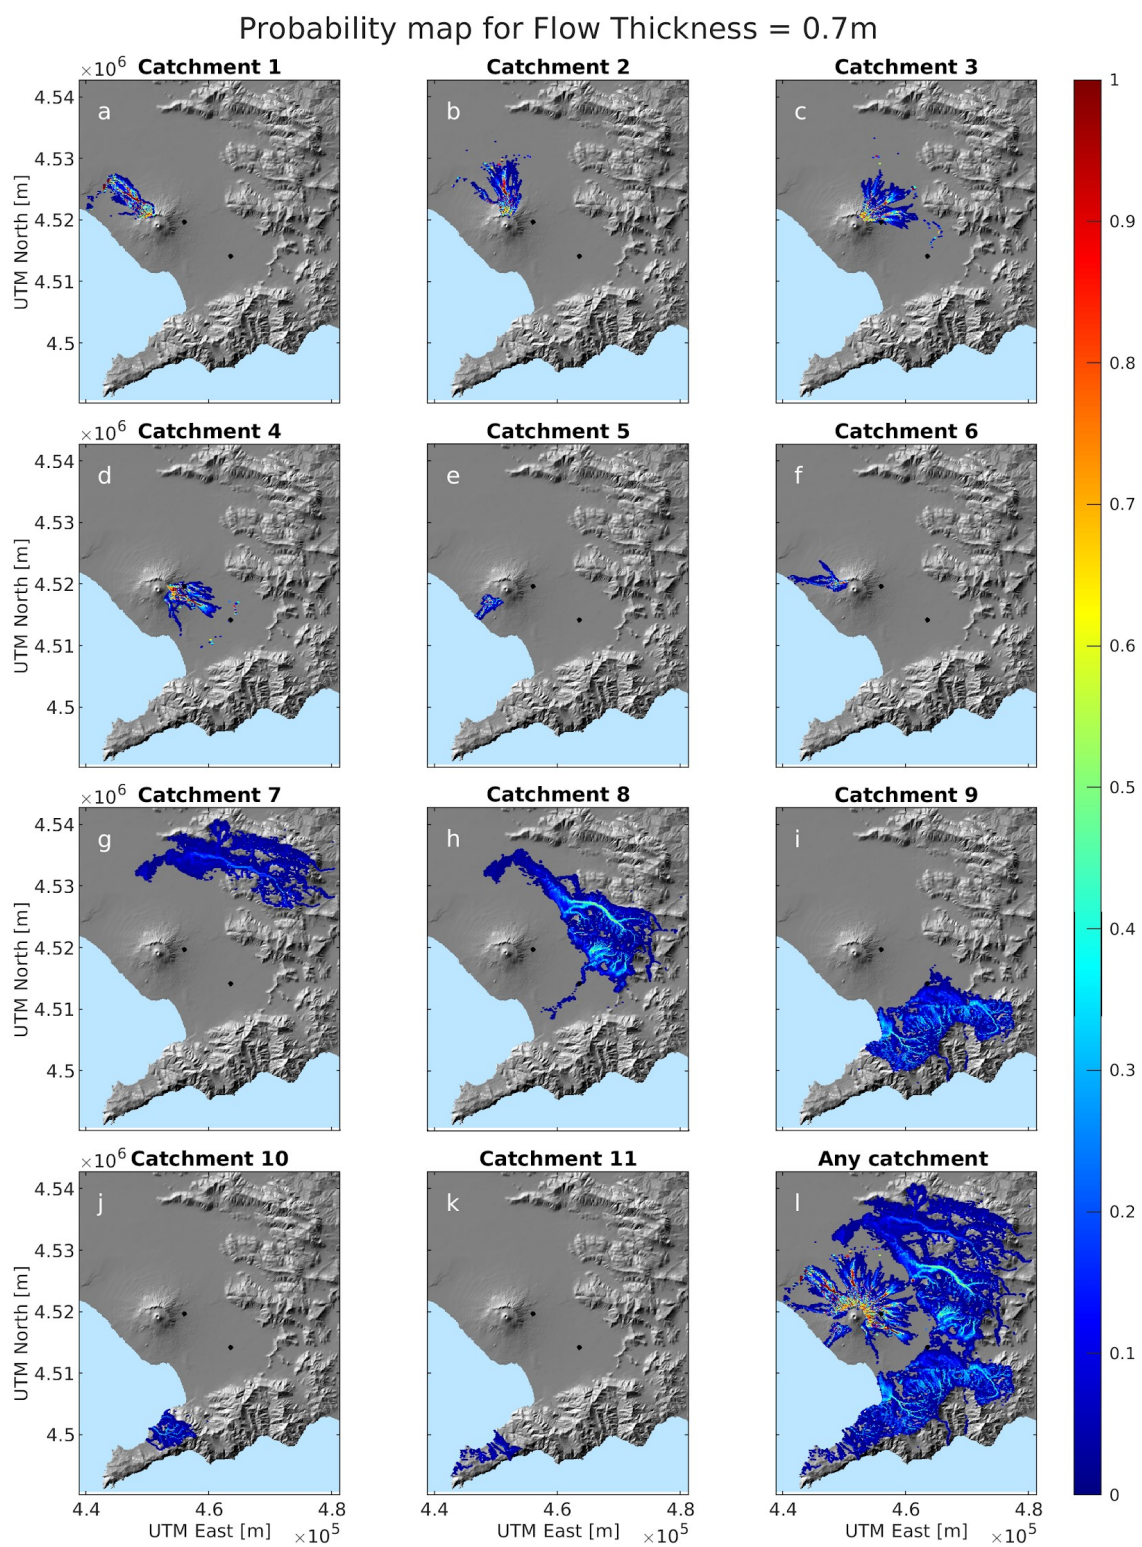

Figure SM13: Probability maps for maximum flow thickness larger than 0.7 m

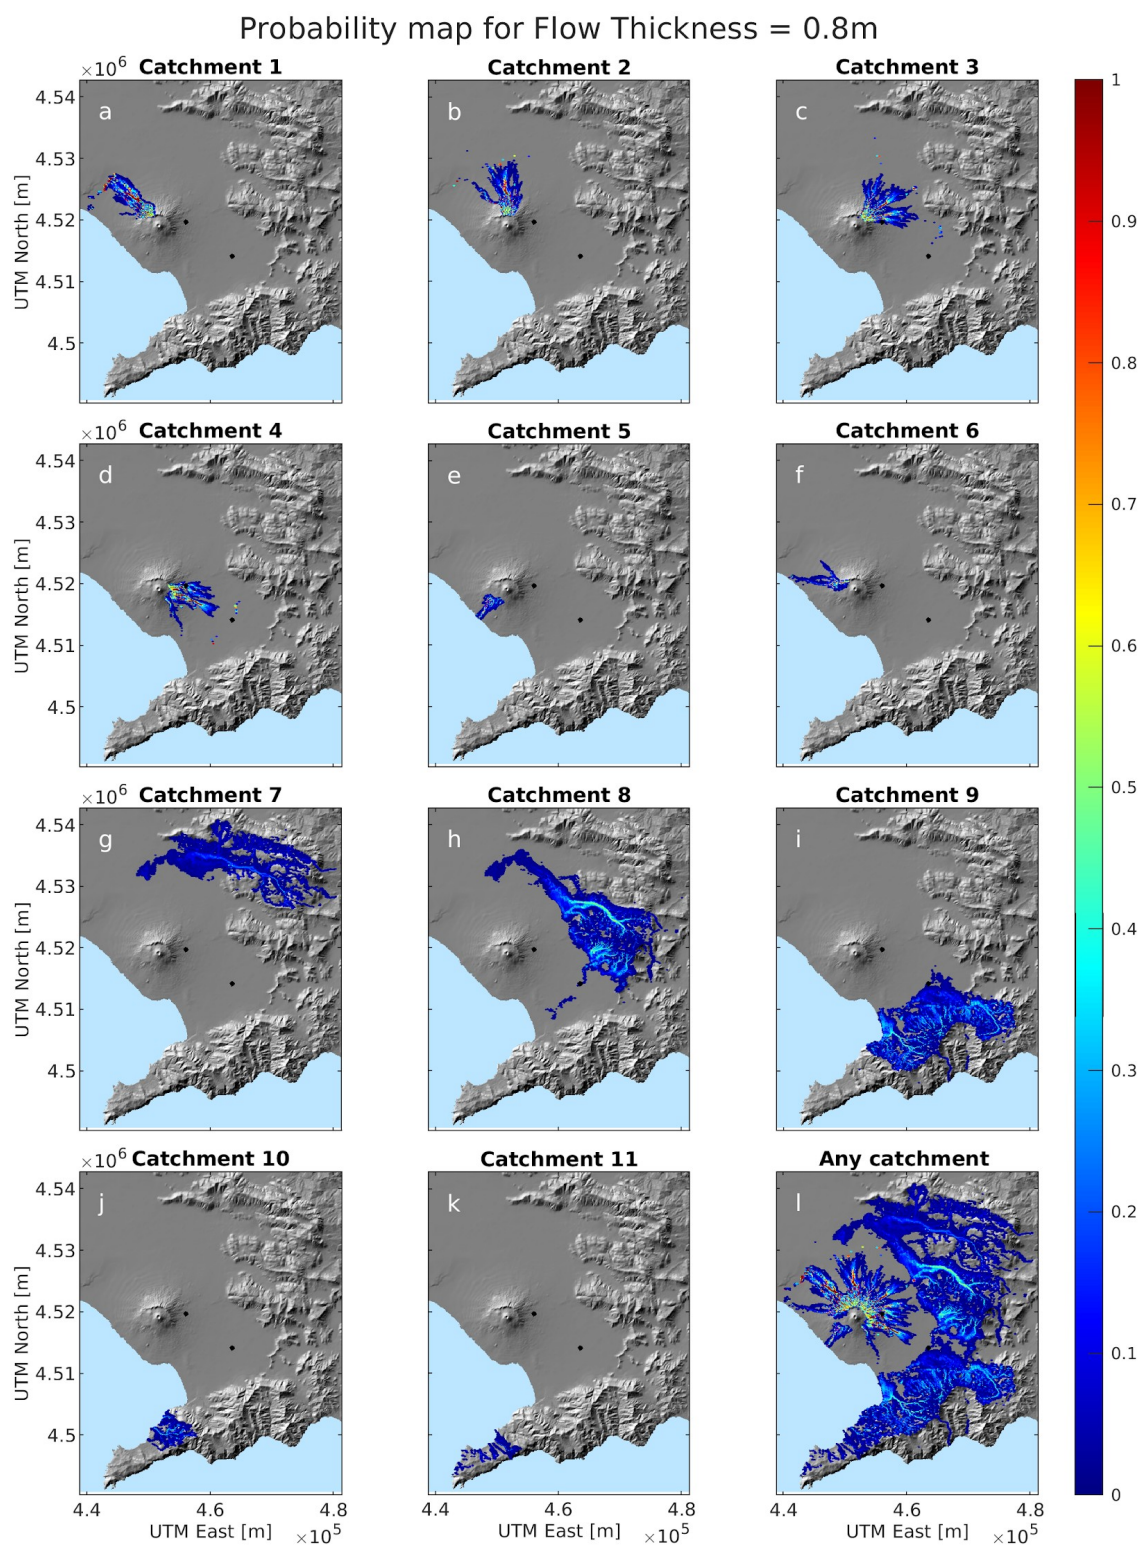

Figure SM14: Probability maps for maximum flow thickness larger than 0.8 m

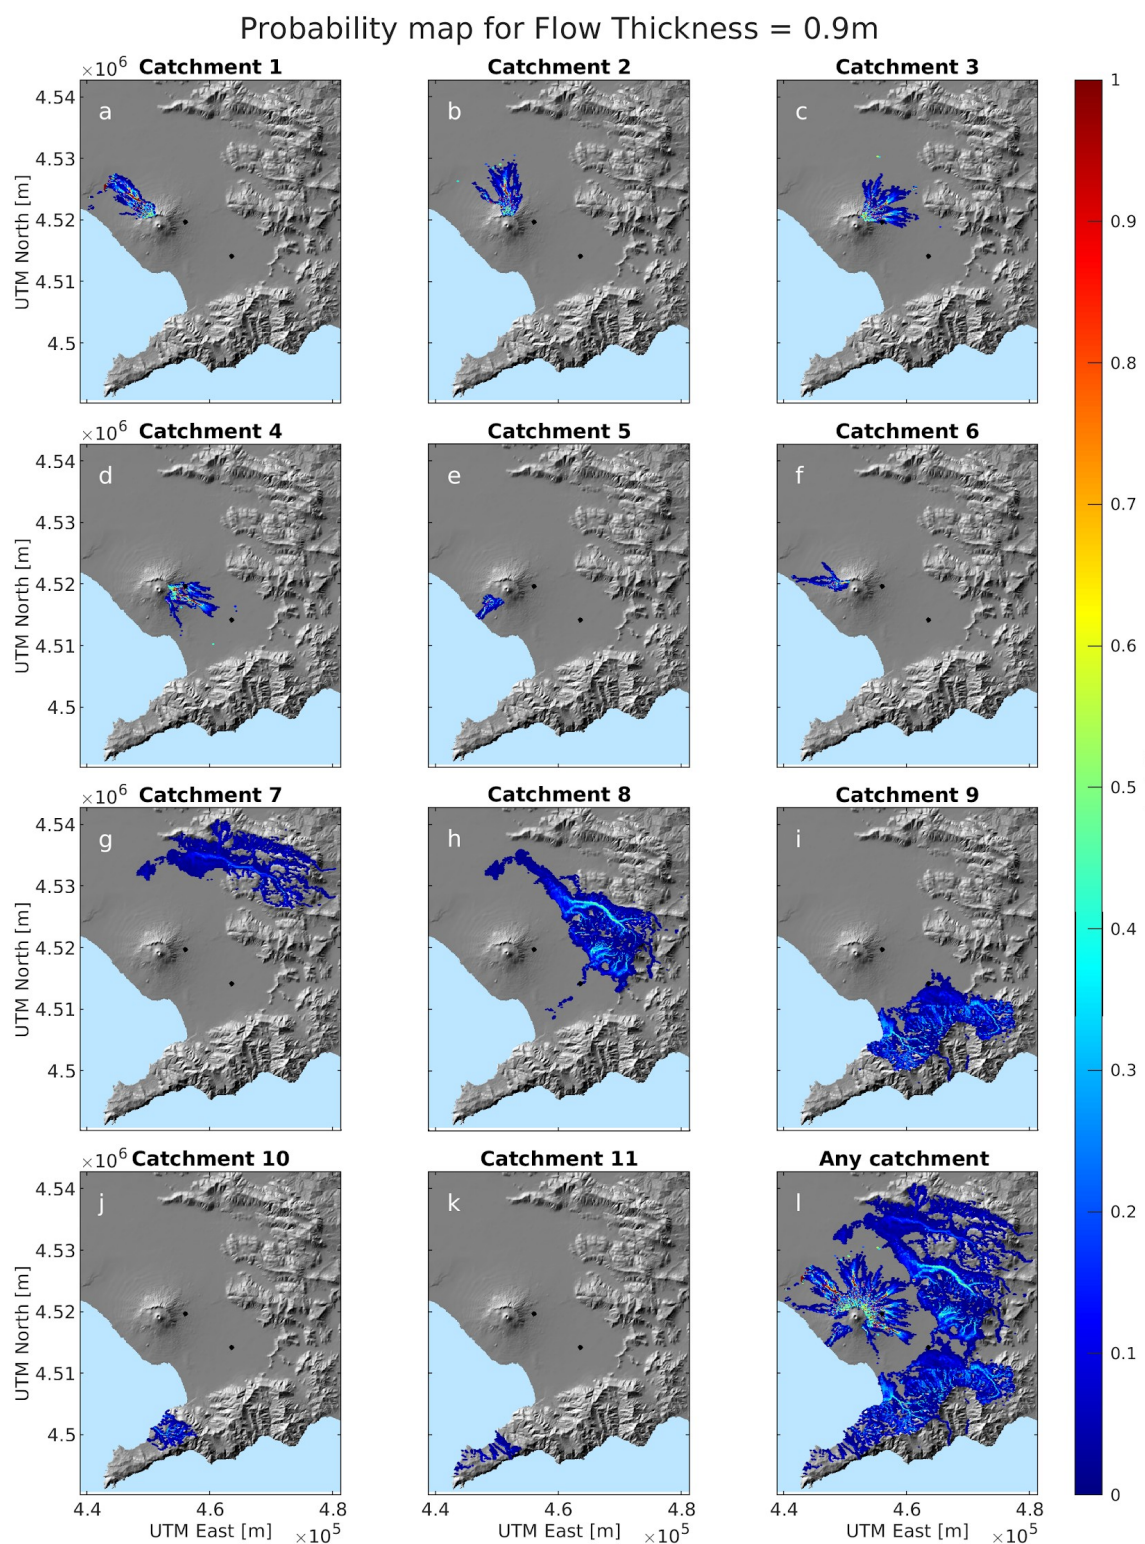

Figure SM15: Probability maps for maximum flow thickness larger than 0.9 m



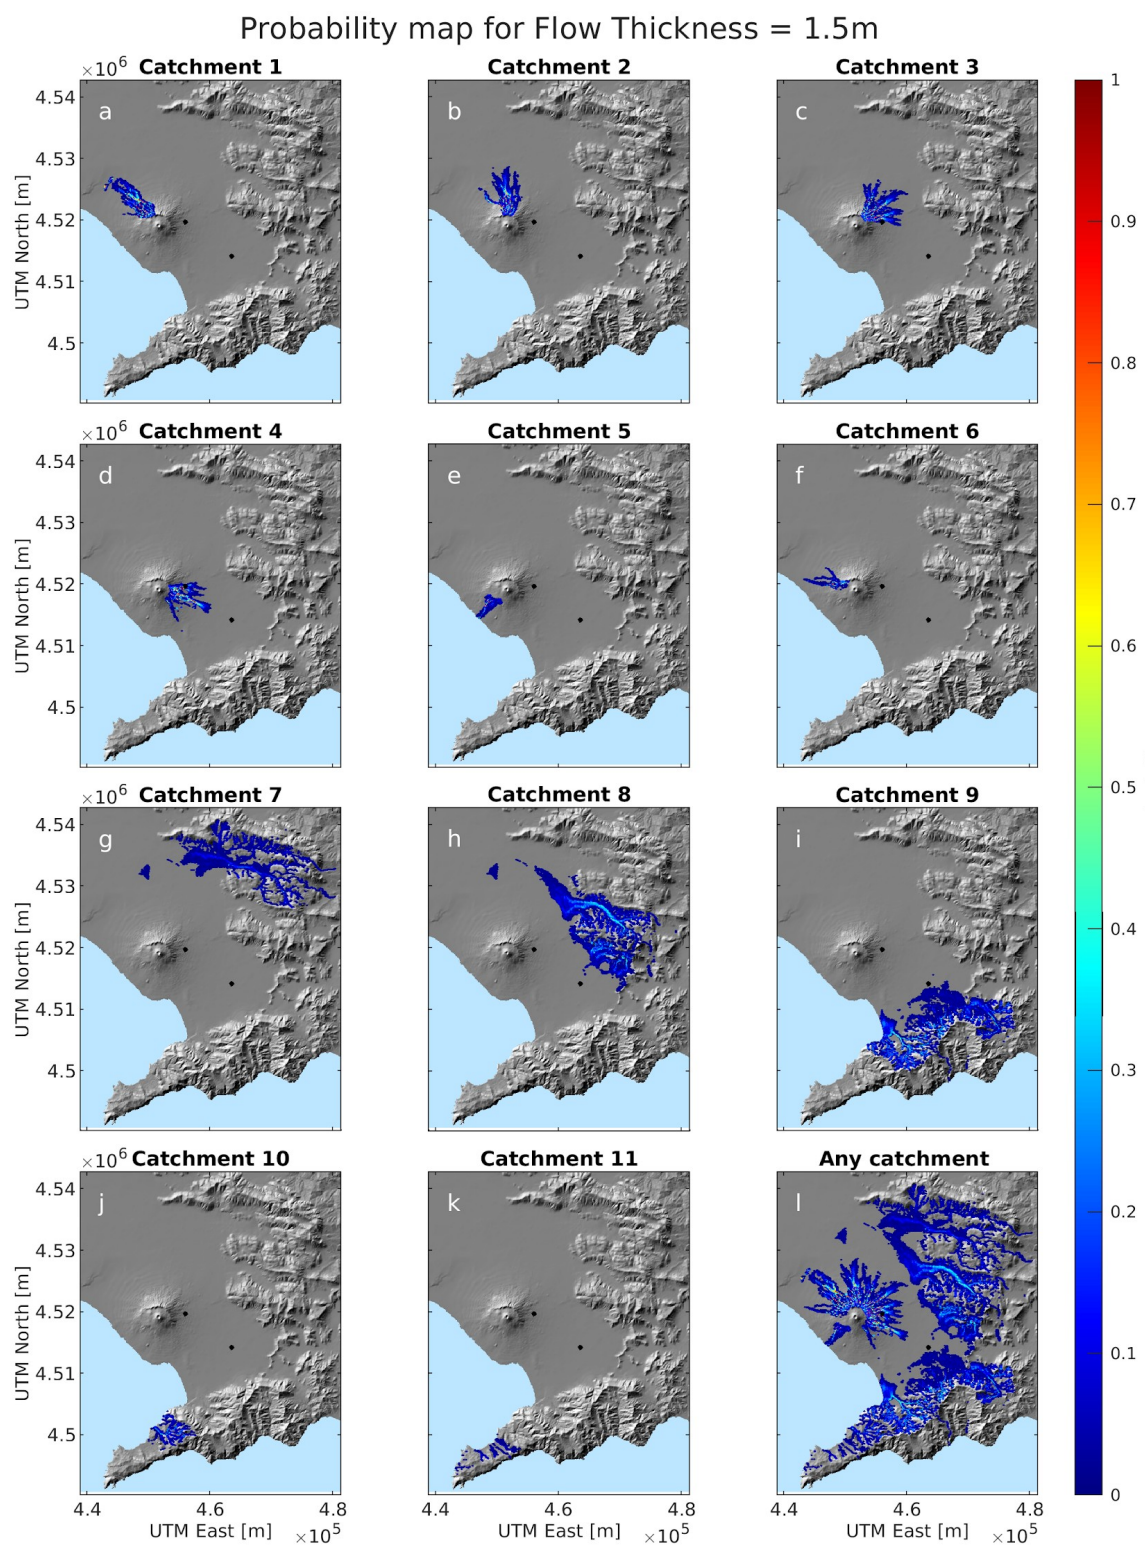

Figure SM16: Probability maps for maximum flow thickness larger than 1.5 m

Probability map for Flow Thickness = 2m

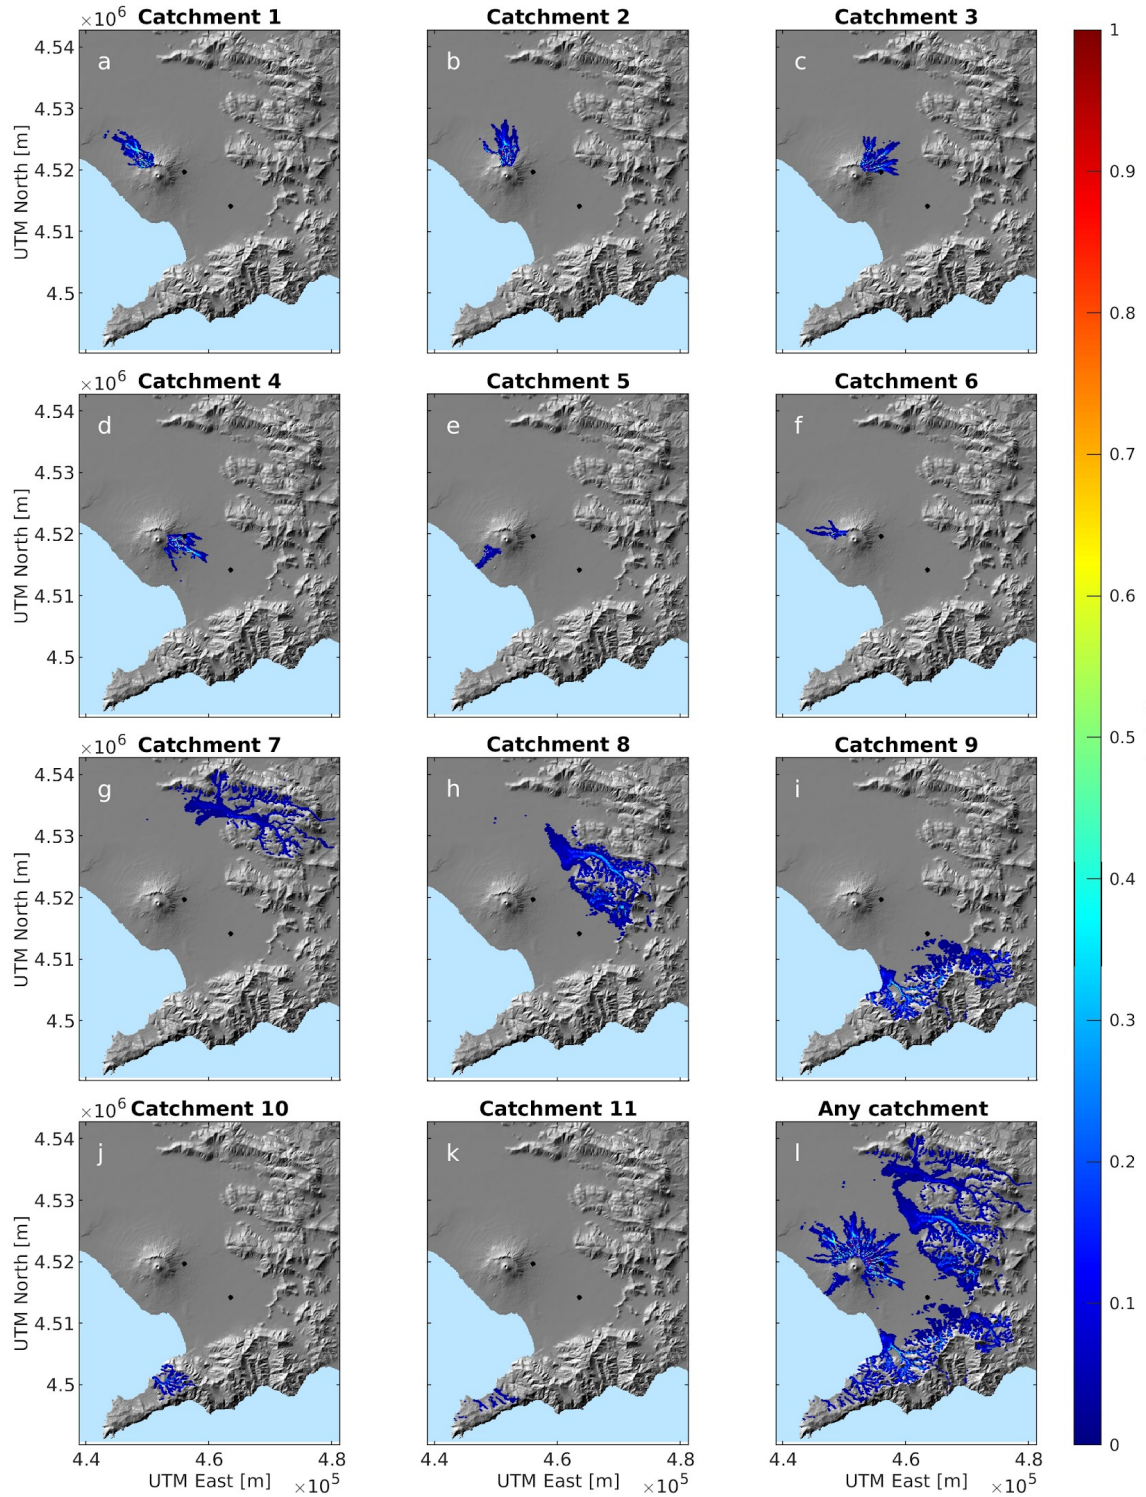

Figure SM17: Probability maps for maximum flow thickness larger than 2 m

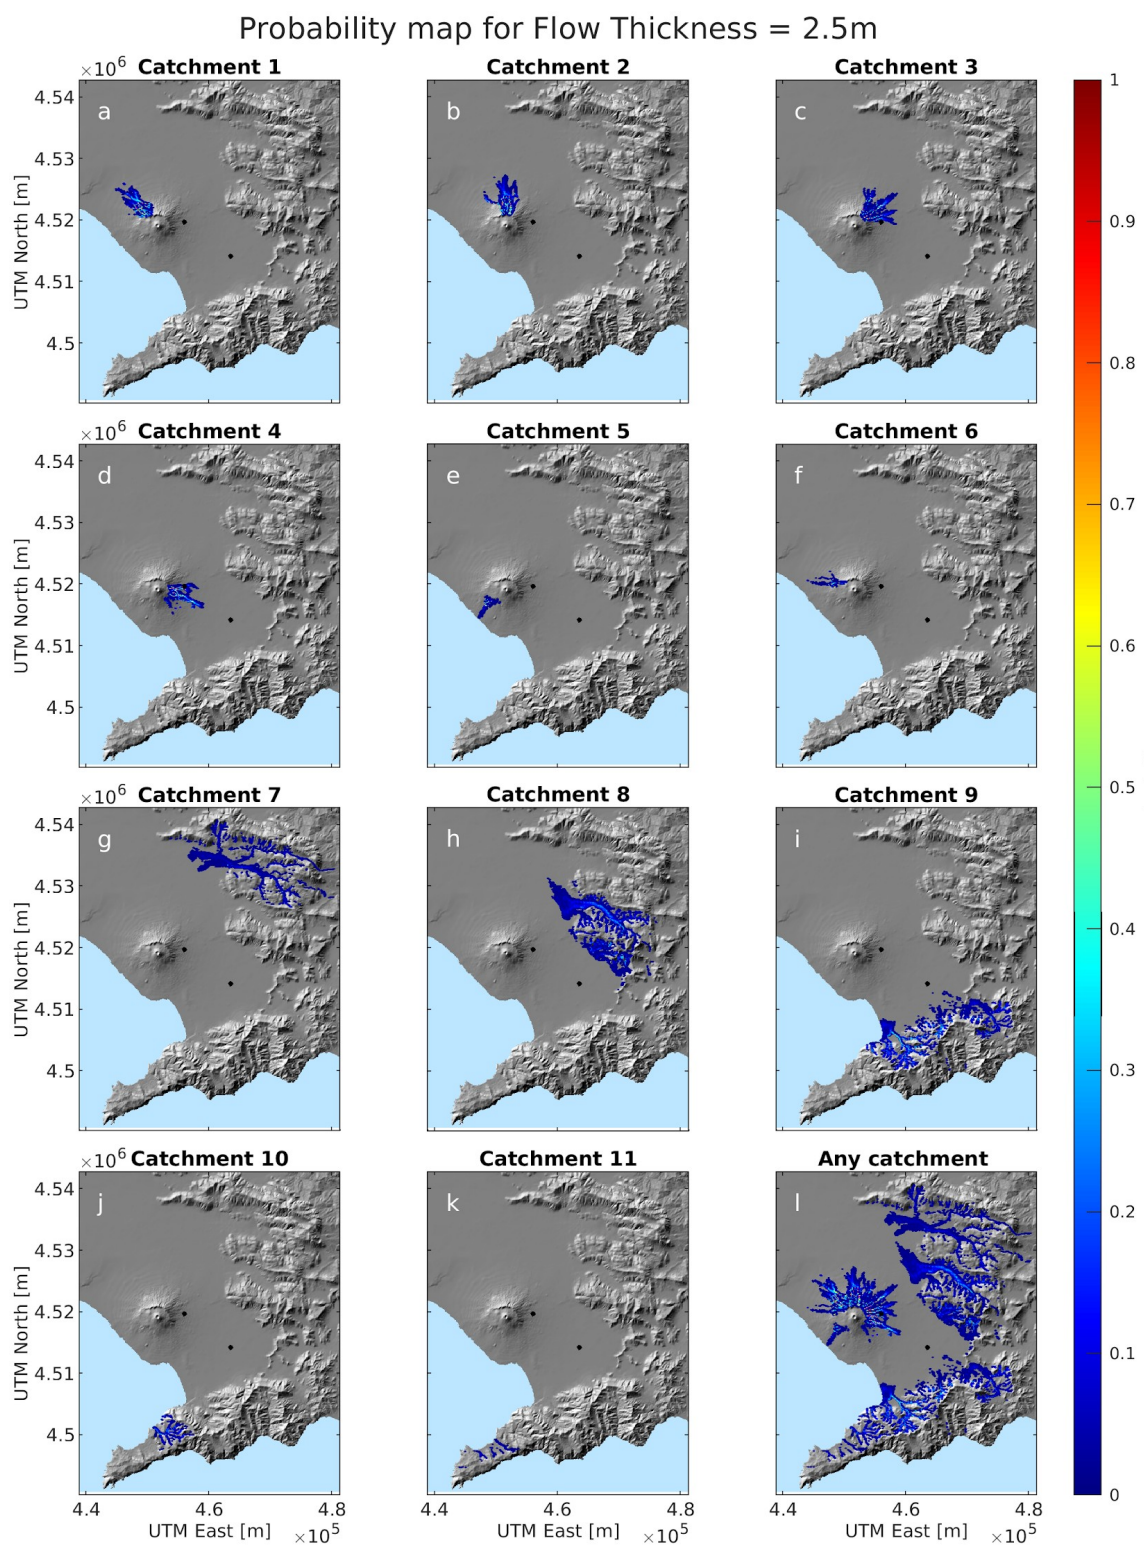

Figure SM18: Probability maps for maximum flow thickness larger than 2.5 m

Probability map for Flow Thickness = 3m

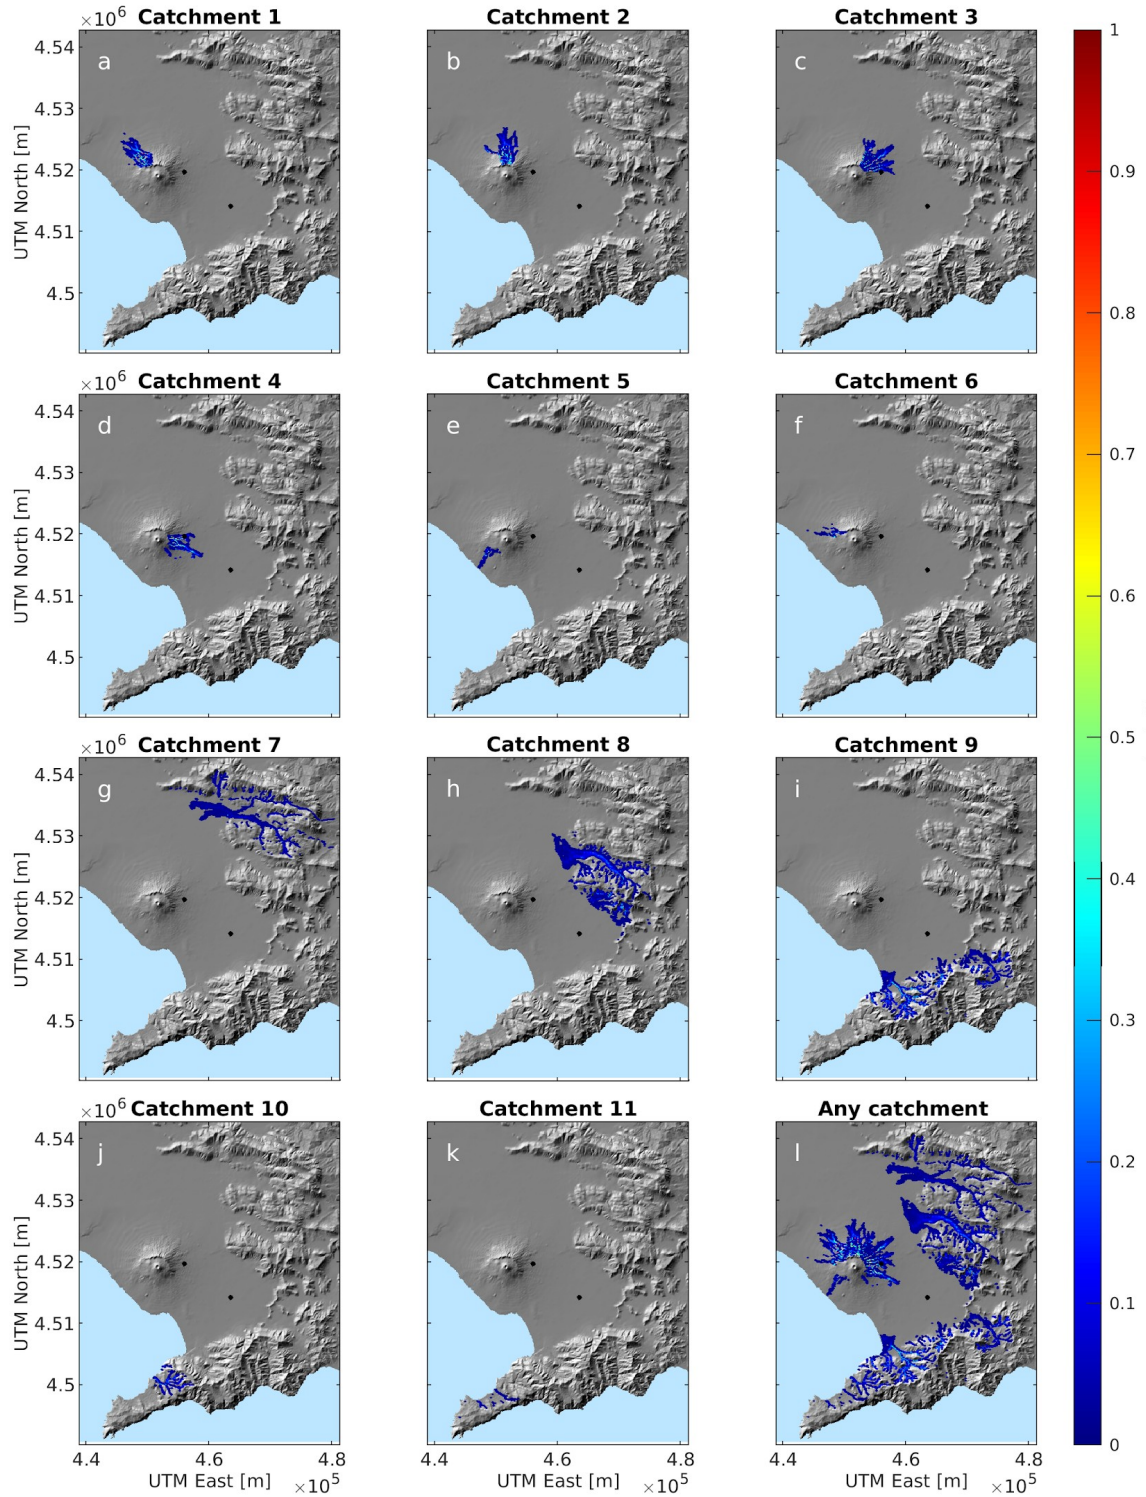

Figure SM19: Probability maps for maximum flow thickness larger than 3 m

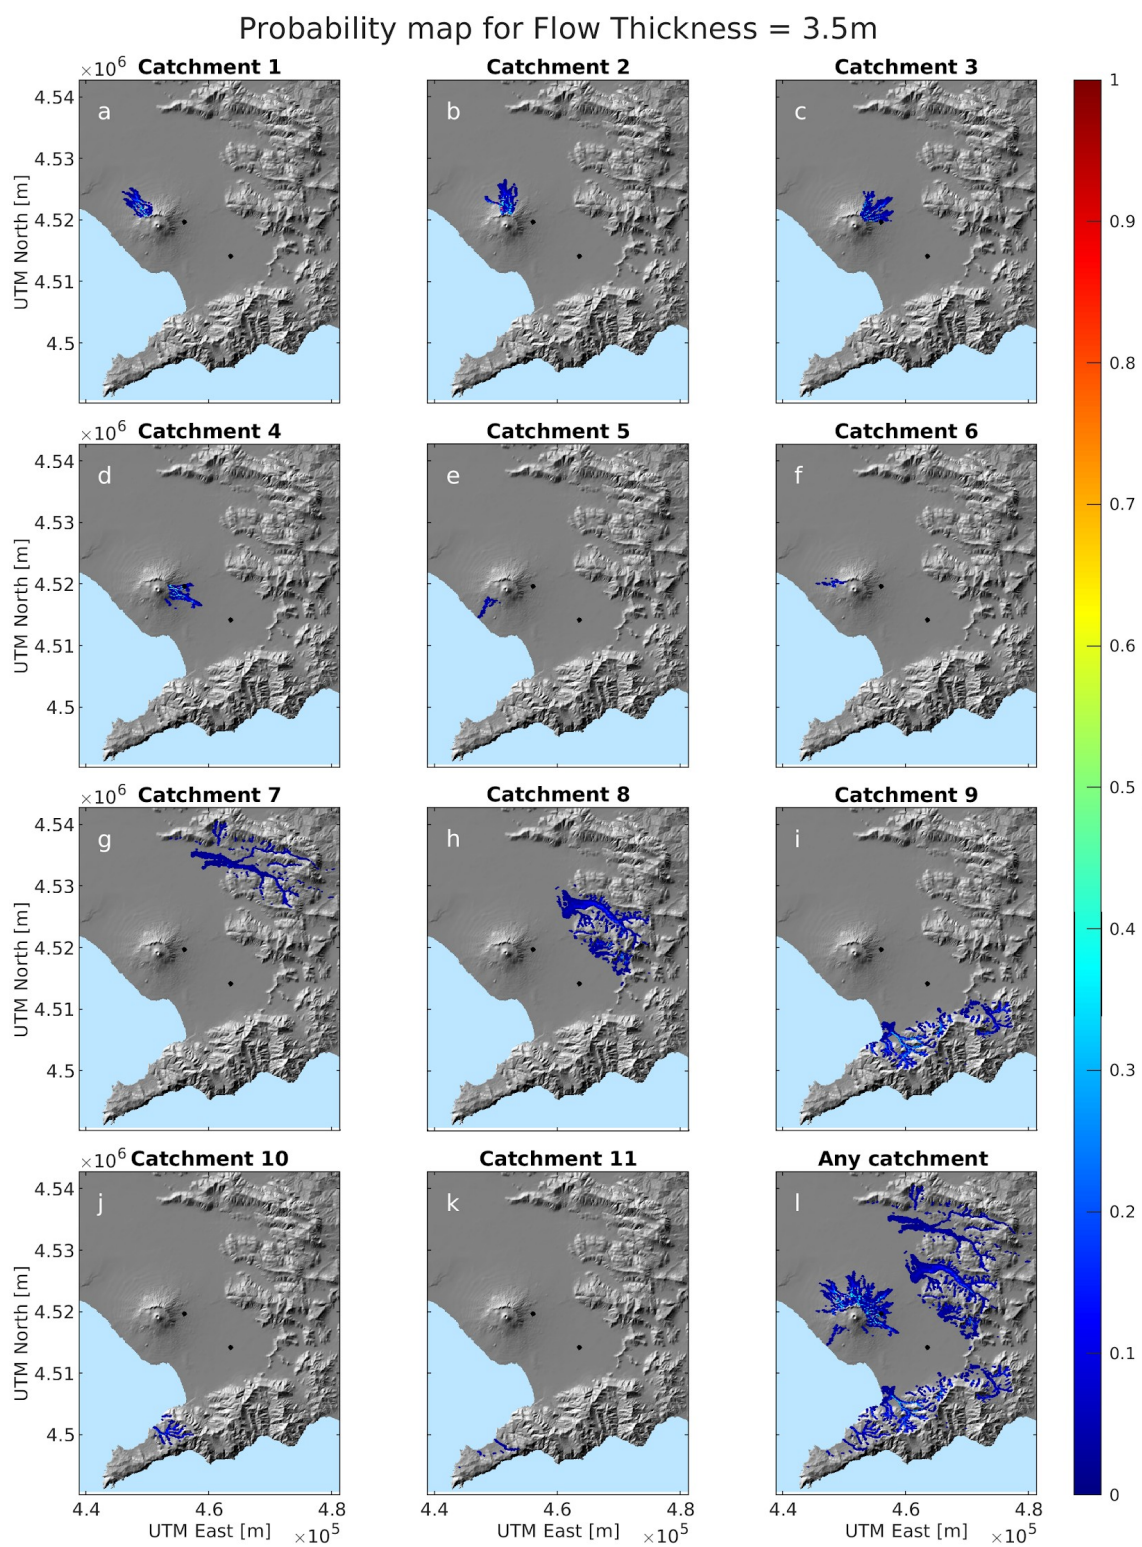

Figure SM20: Probability maps for maximum flow thickness larger than 3.5 m

Probability map for Flow Thickness = 4m

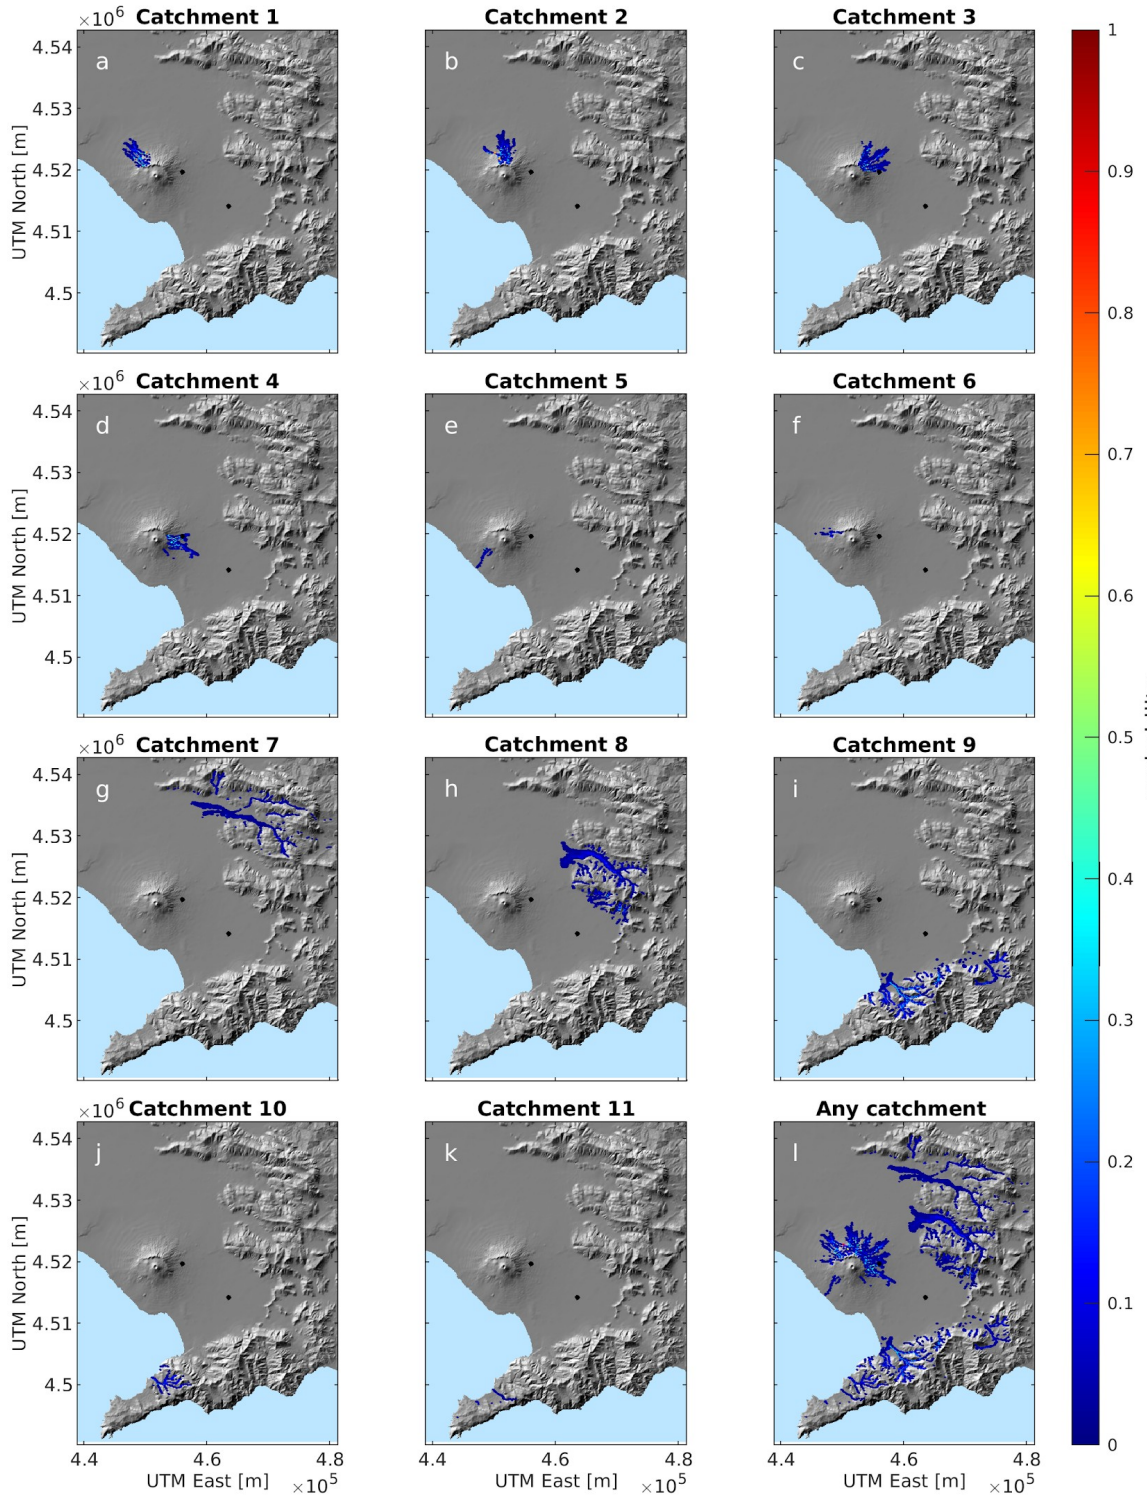

Figure SM21: Probability maps for maximum flow thickness larger than 4 m

Probability map for Flow Thickness = 6m

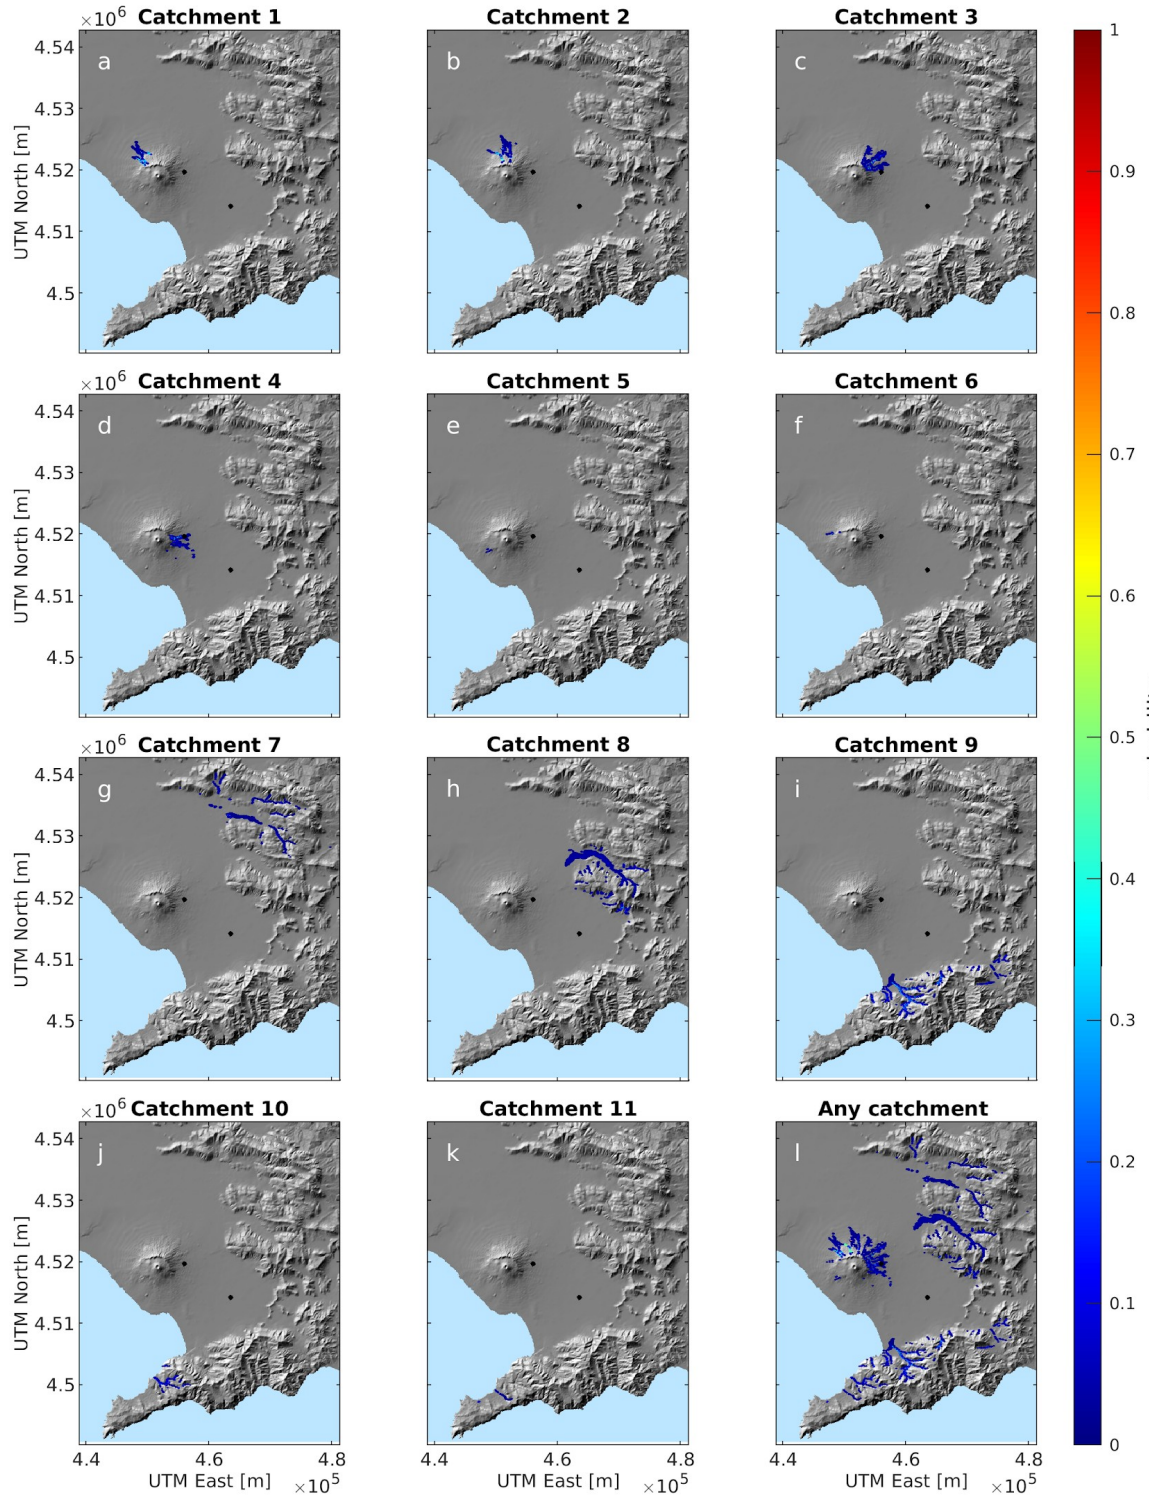

Figure SM22: Probability maps for maximum flow thickness larger than 6 m

Probability map for Flow Thickness = 8m

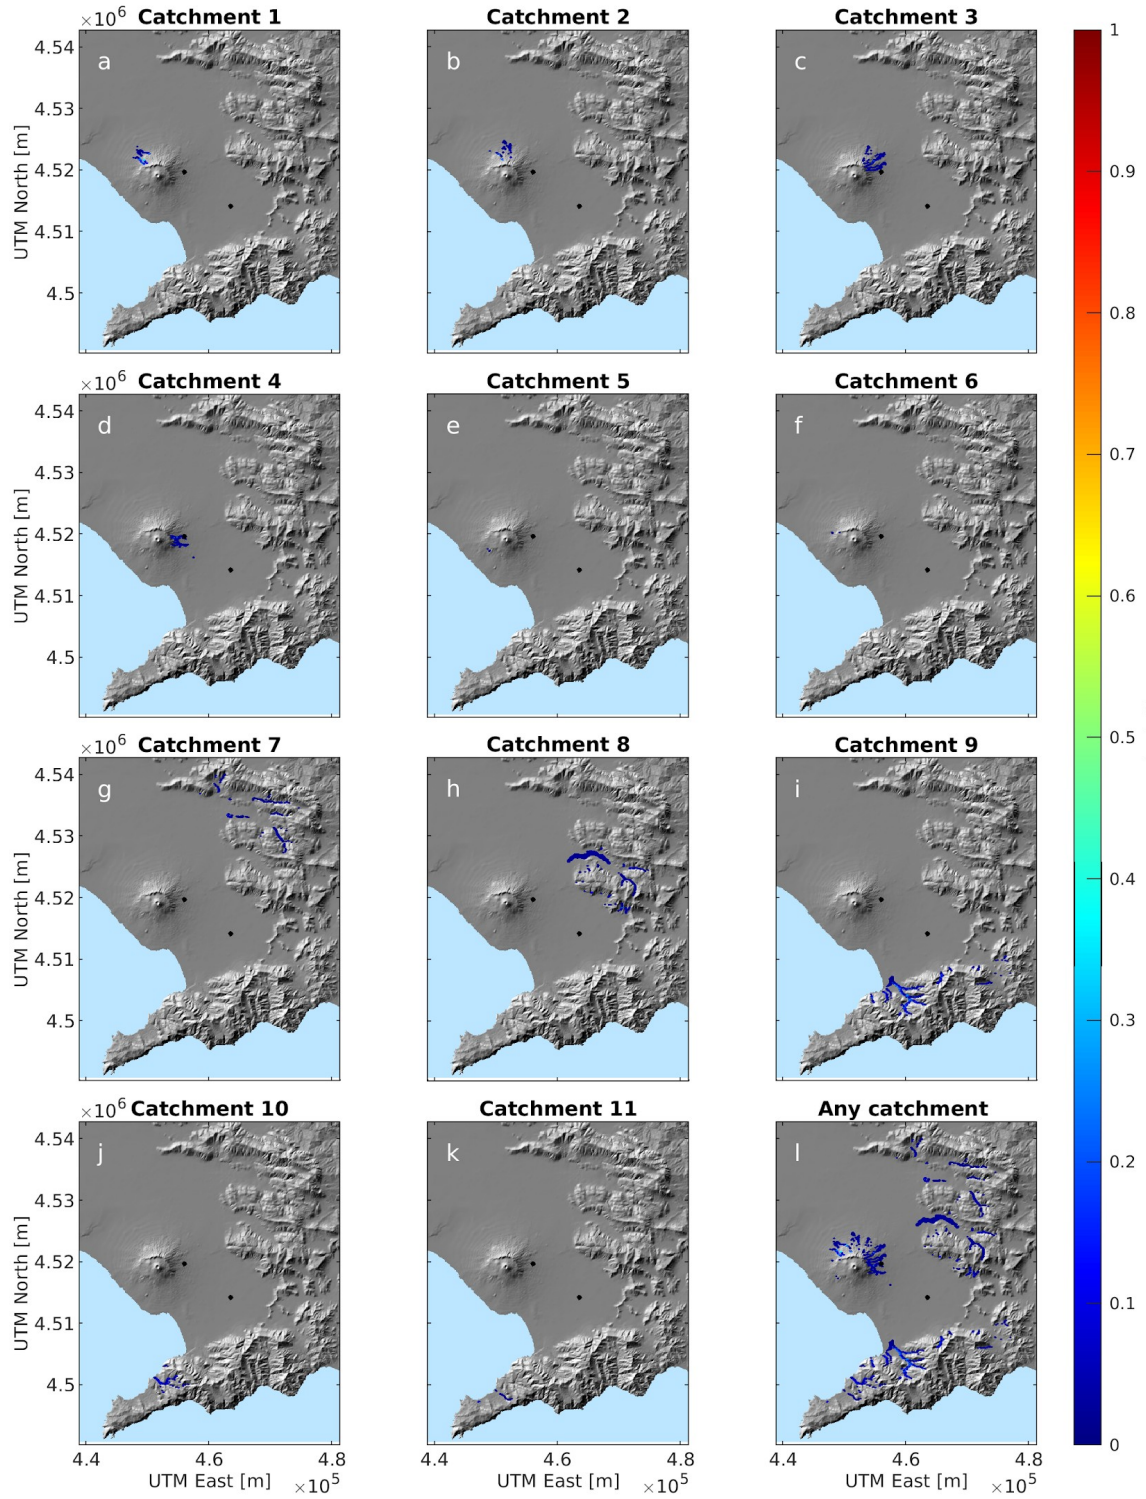

Figure SM23: Probability maps for maximum flow thickness larger than 8 m



Probability map for Flow Thickness = 10m

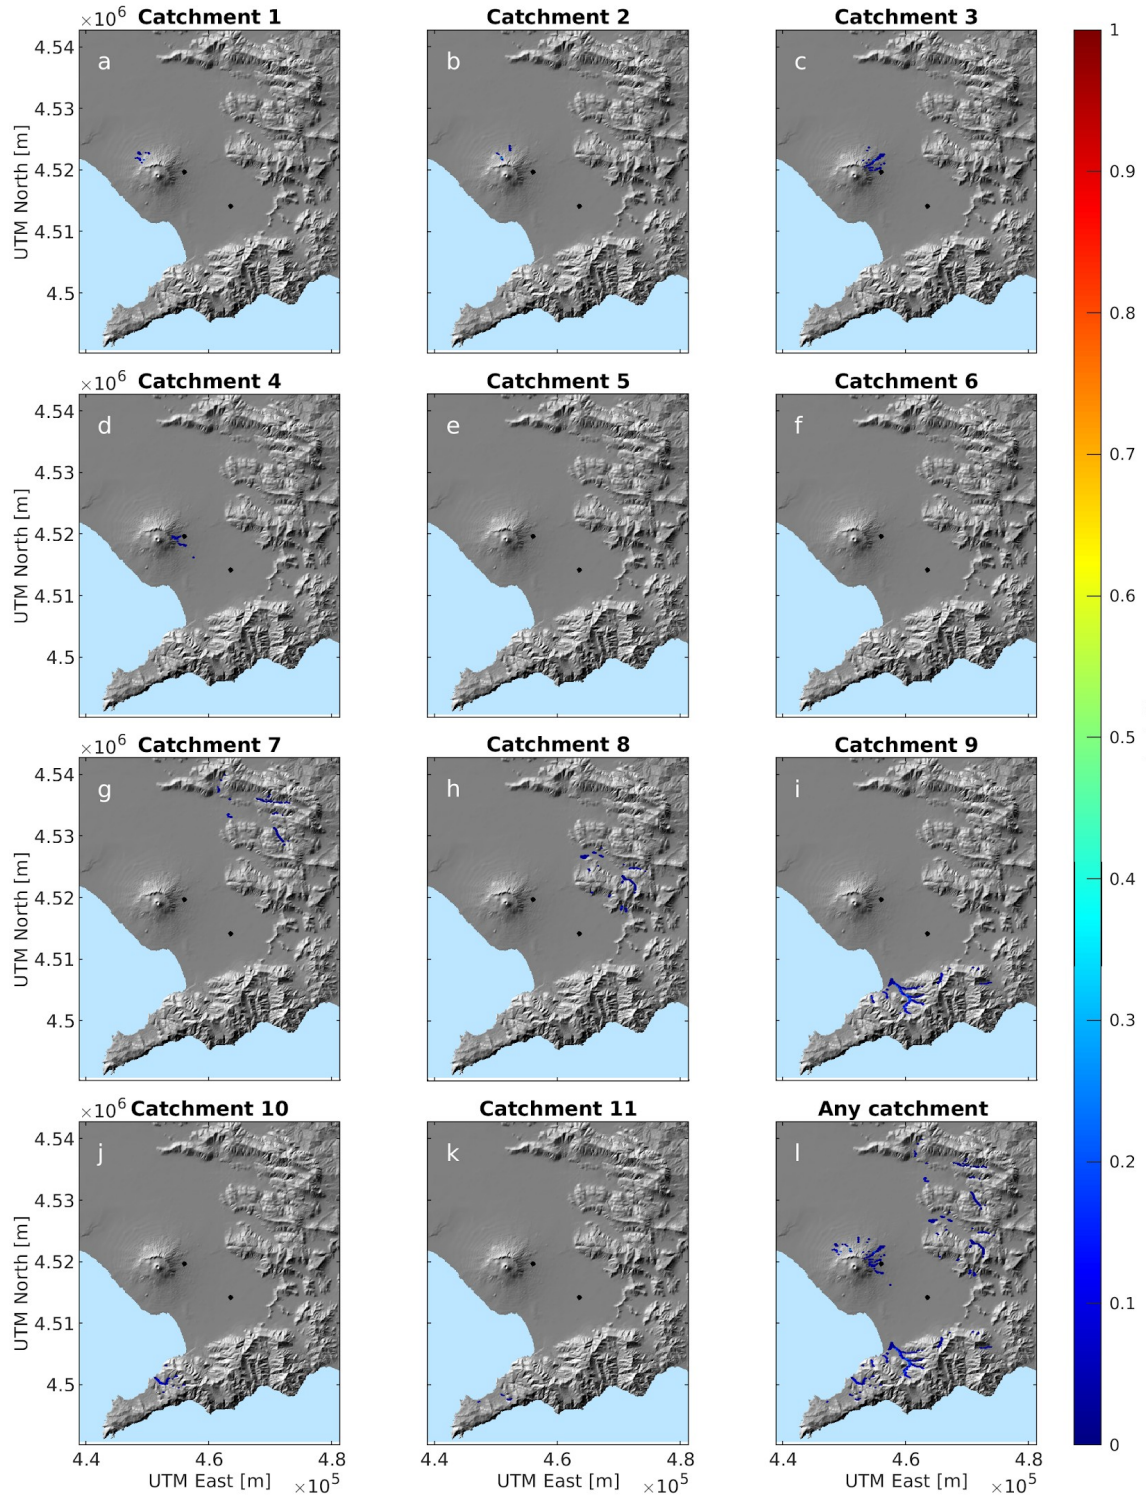

Figure SM24: Probability maps for maximum flow thickness larger than 10 m

Probability map for Flow Thickness = 15m

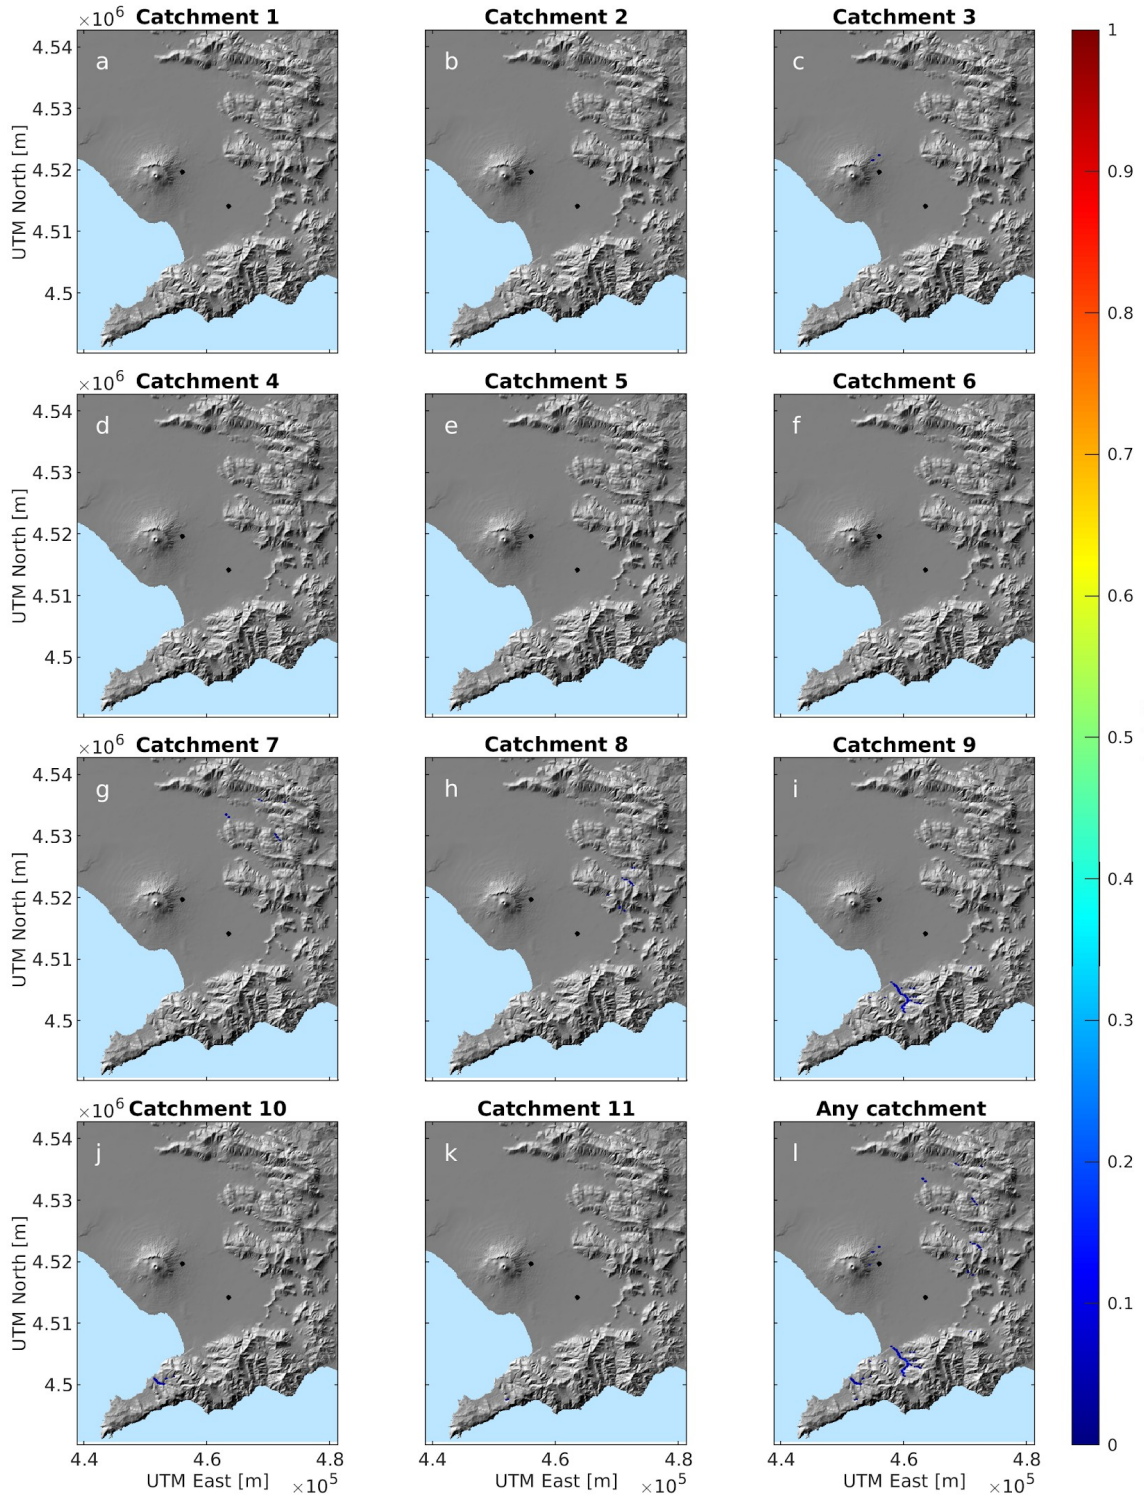

Figure SM25: Probability maps for maximum flow thickness larger than 15 m

Probability map for Flow Thickness = 20m

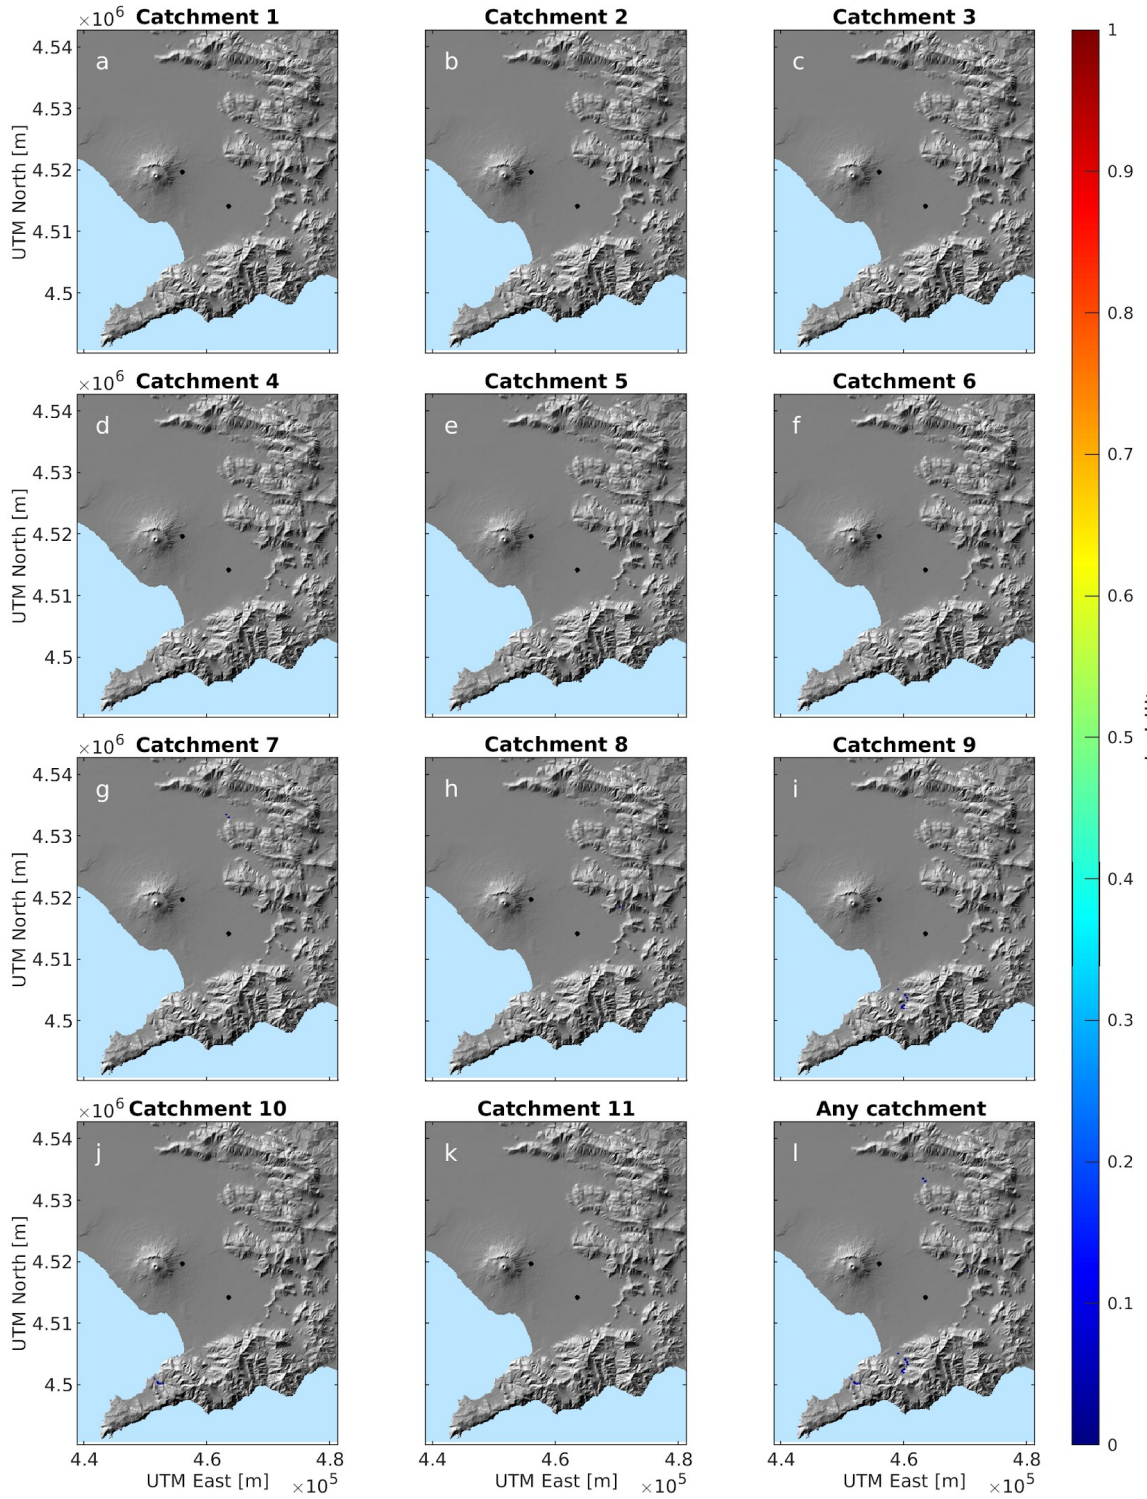

Figure SM26: Probability maps for maximum flow thickness larger than 20 m

Hazard map for exceedance probability = 1%

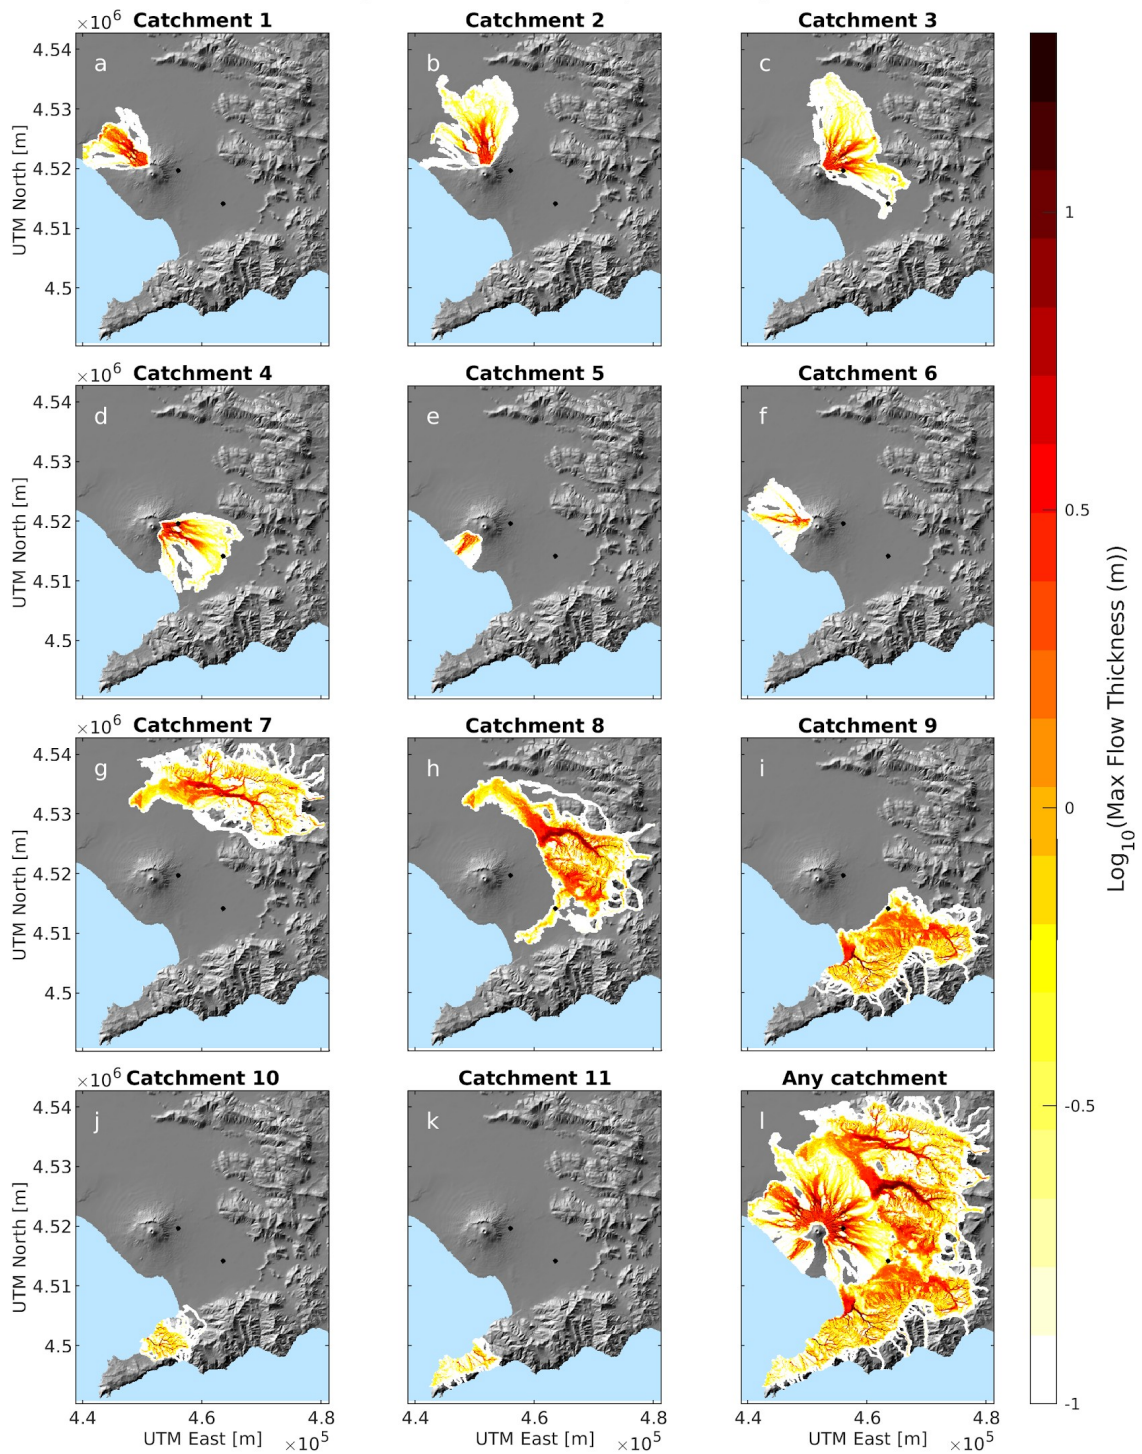

Figure SM27: 1% hazard maps in maximum flow thickness

Hazard map for exceedance probability = 2%

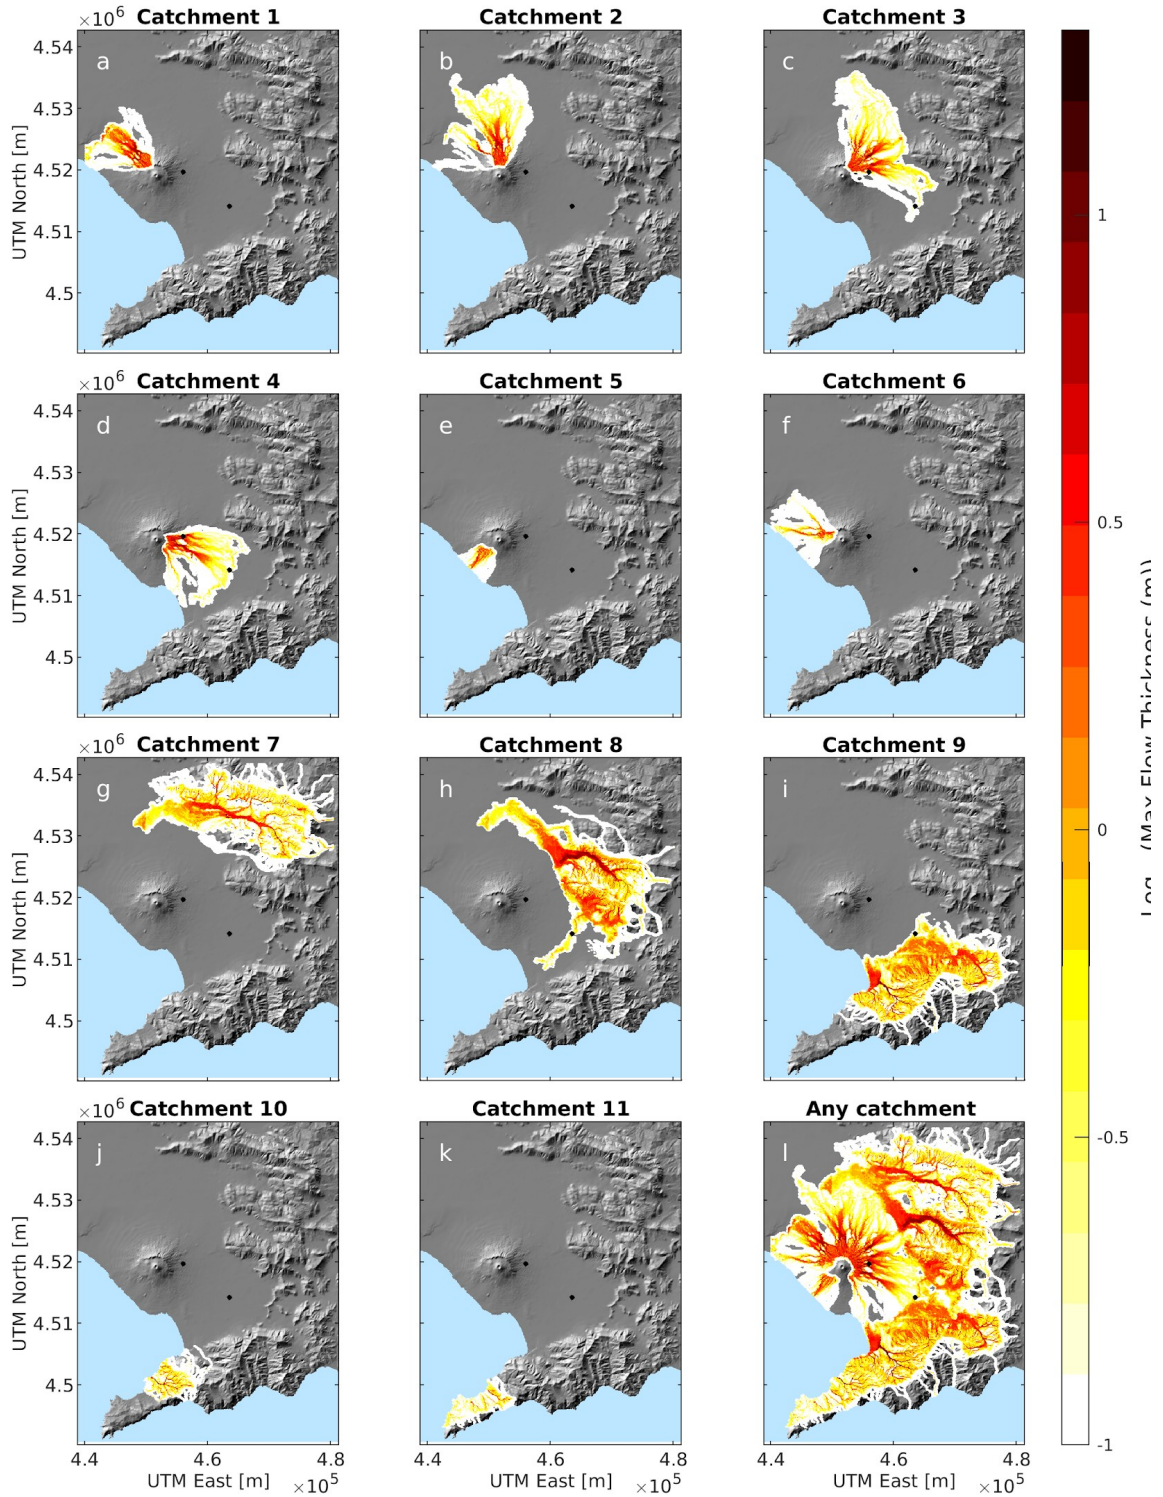

Figure SM28: 2% hazard maps in maximum flow thickness

### Hazard map for exceedance probability = 10%

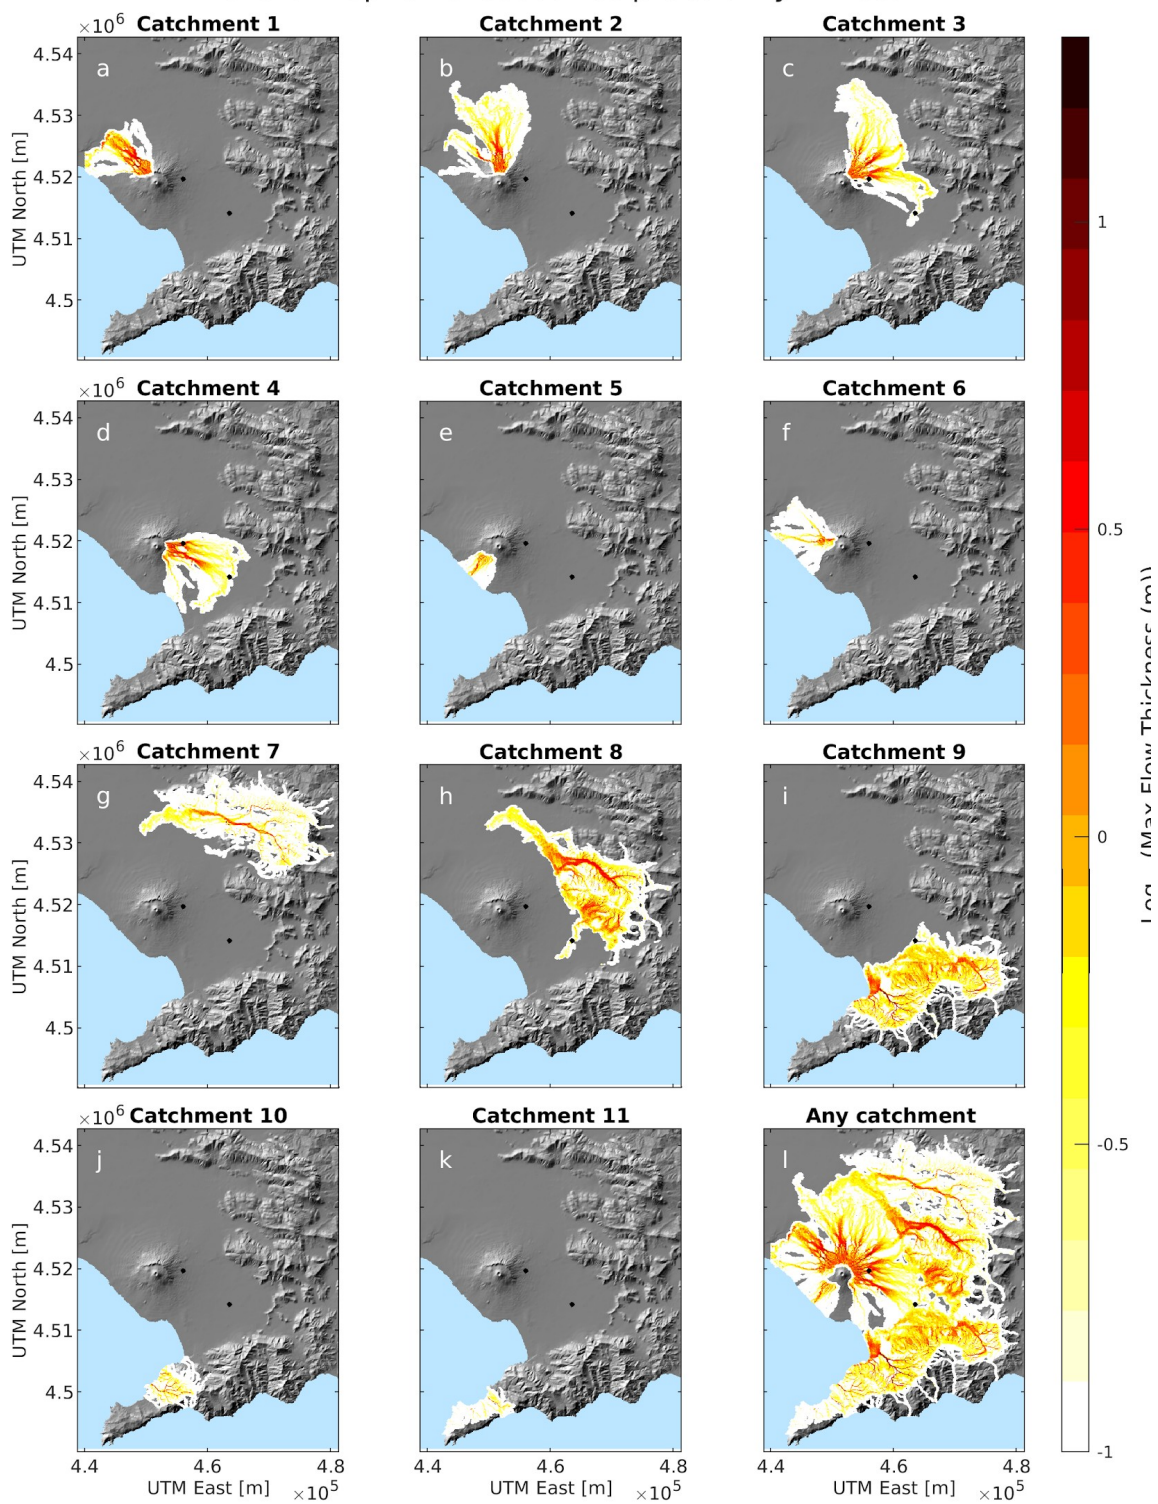

Figure SM29: 10% hazard maps in maximum flow thickness

Hazard map for exceedance probability = 50%

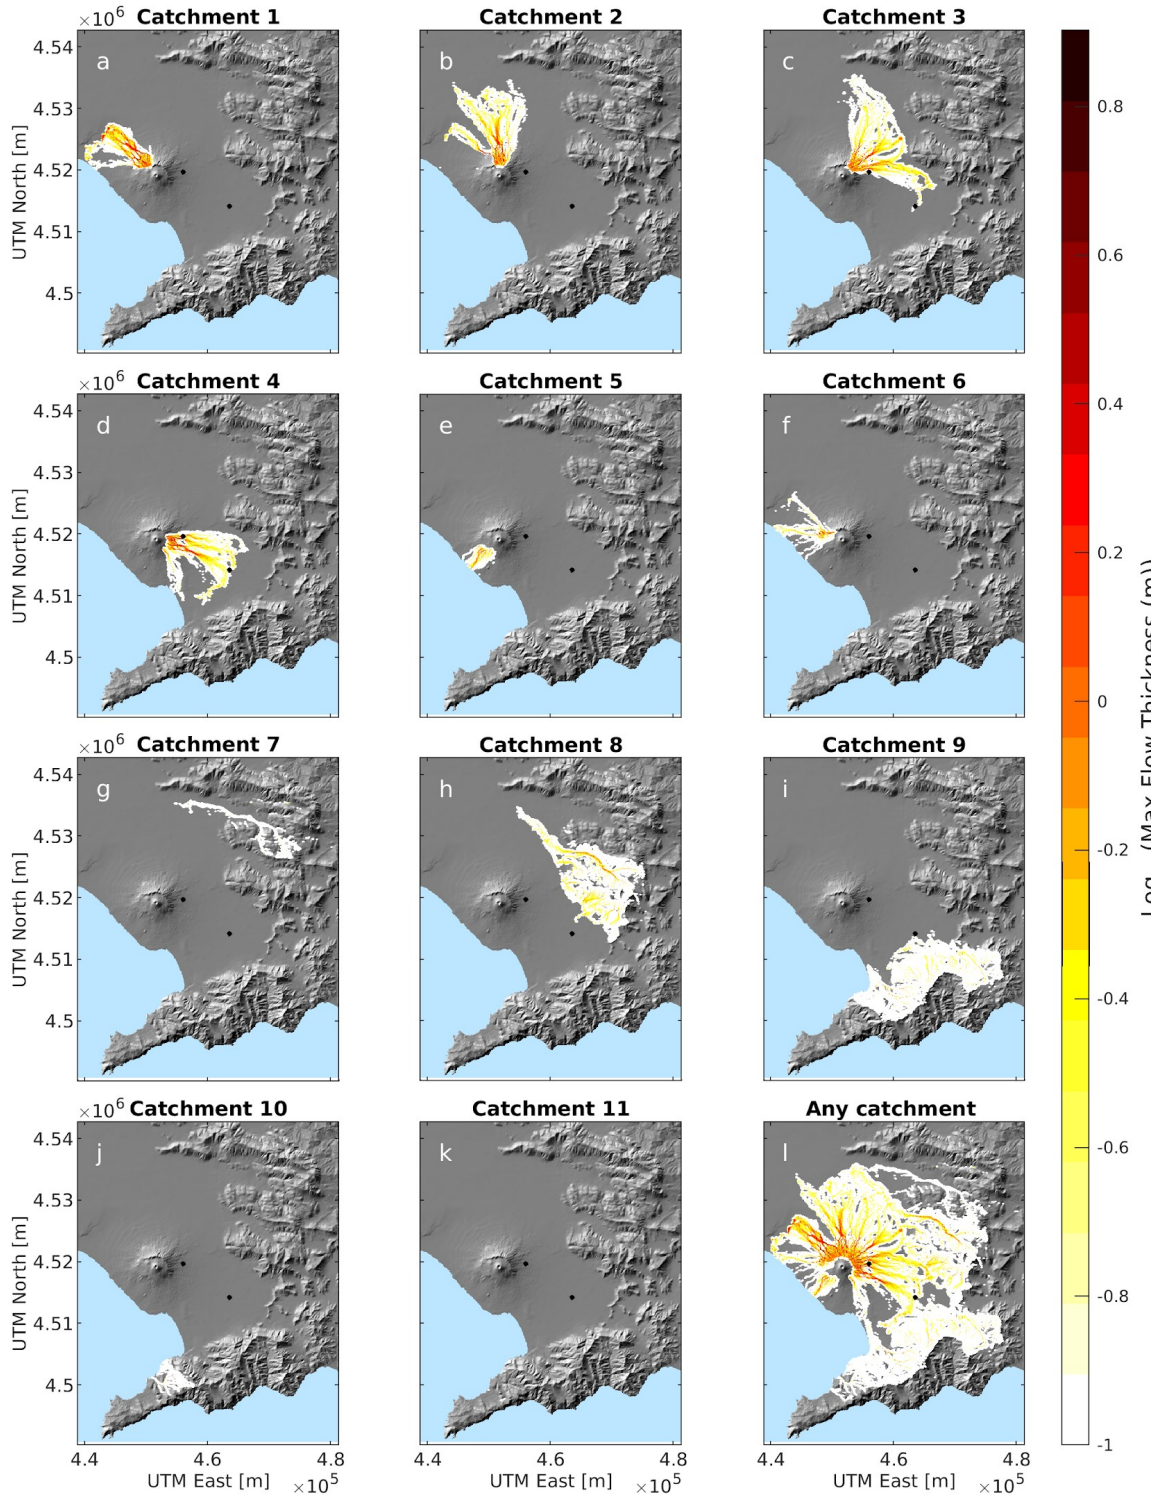

Figure SM30: 50% hazard maps in maximum flow thickness

Hazard map for exceedance probability = 90%

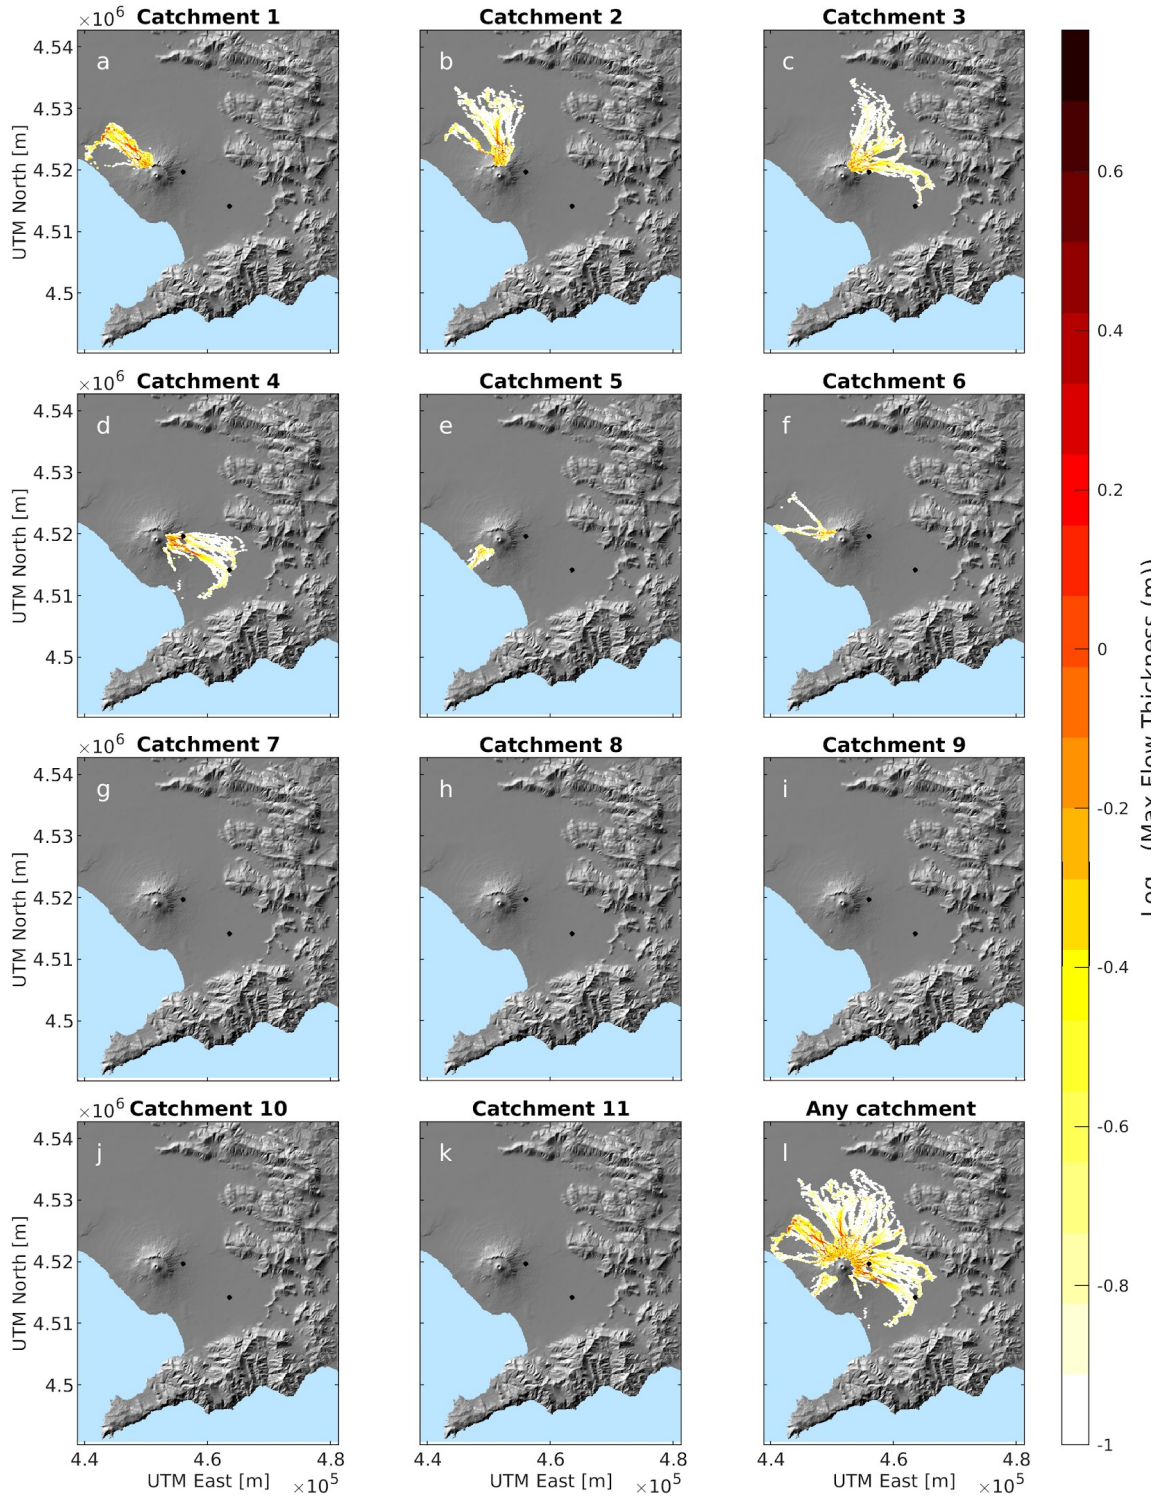

Figure SM31: 90% hazard maps in maximum flow thickness



Probability map for FlowThick = 0m and DynPress = 0.5kPa

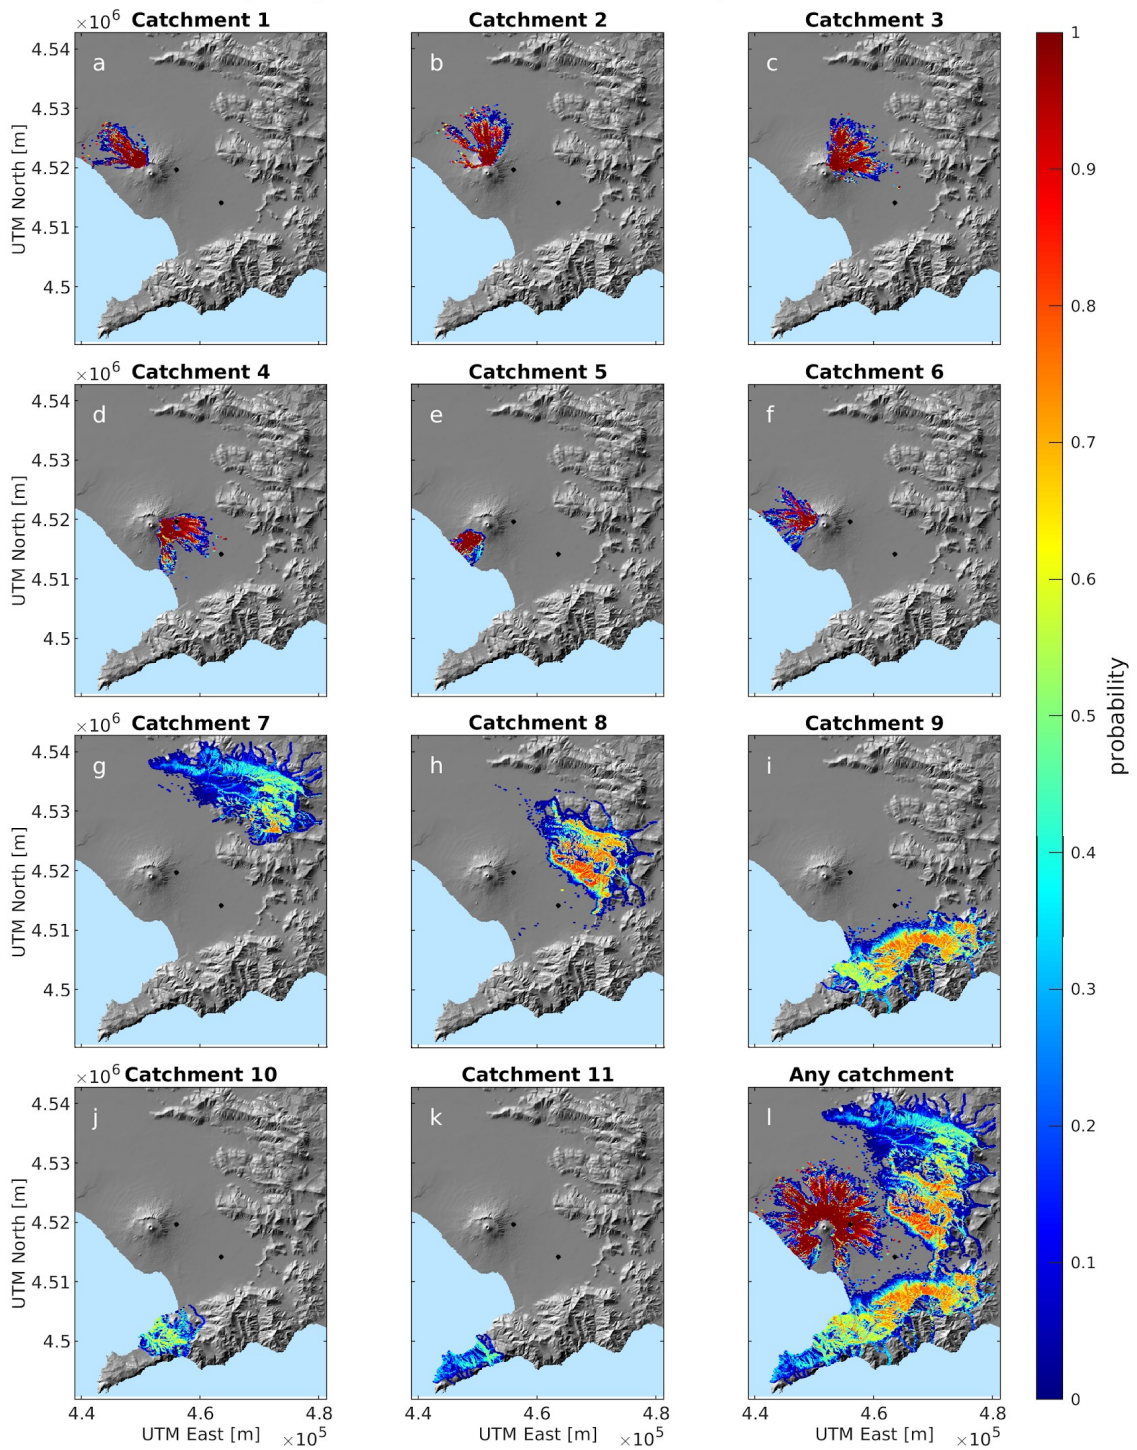

Figure SM32: Probability maps for dynamic pressure larger than 0.5 kPa

Probability map for FlowThick = 0m and DynPress = 1kPa

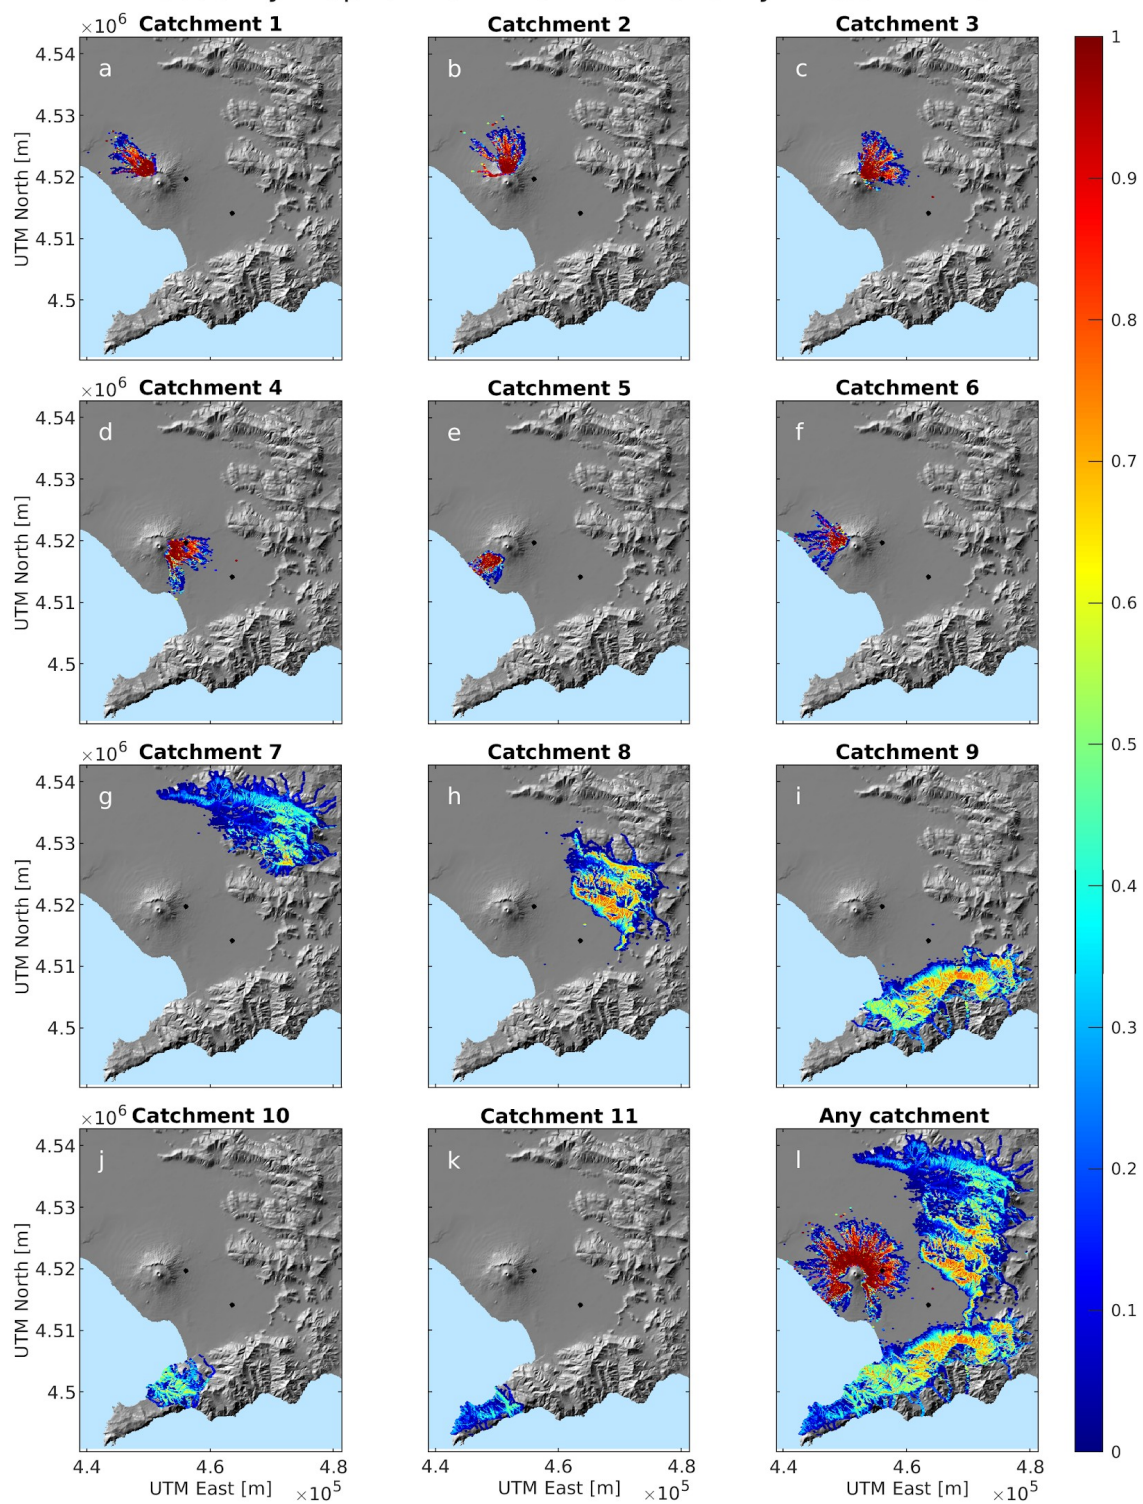

Figure SM33: Probability maps for dynamic pressure larger than 1 kPa

Probability map for FlowThick = 0m and DynPress = 2kPa

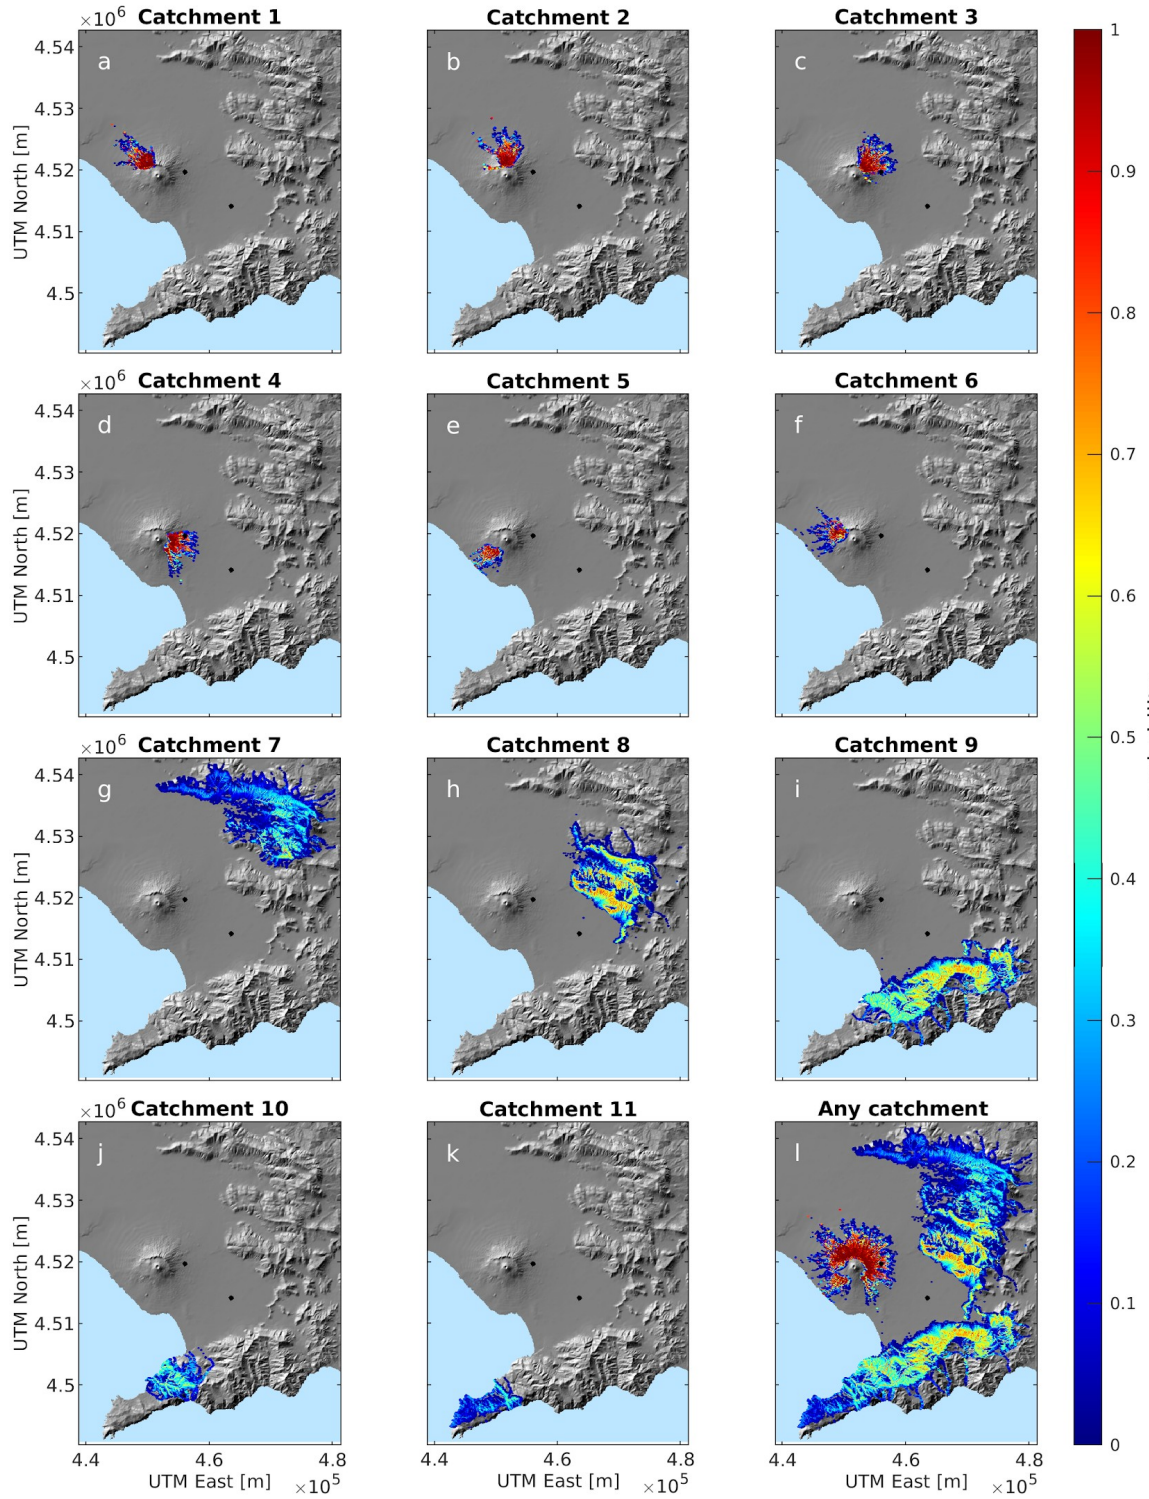

Figure SM34: Probability maps for dynamic pressure larger than 2 kPa

Probability map for FlowThick = 0m and DynPress = 5kPa

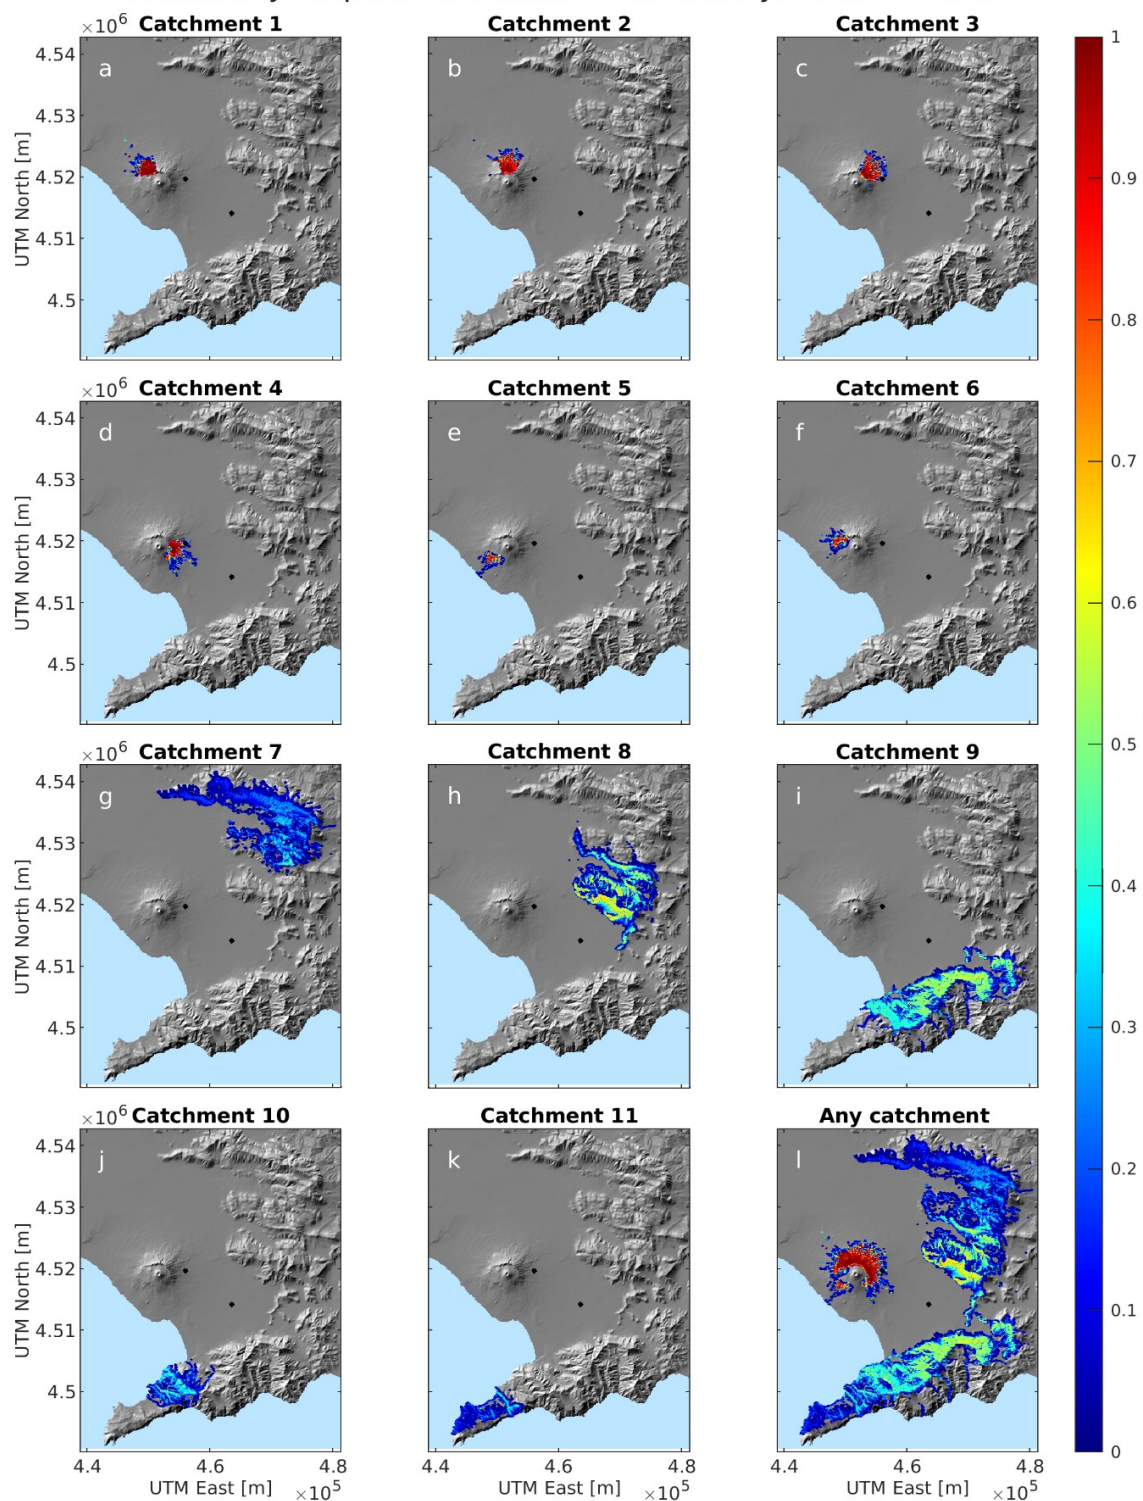

Figure SM35: Probability maps for dynamic pressure larger than 5 kPa

Probability map for FlowThick = 0m and DynPress = 30kPa

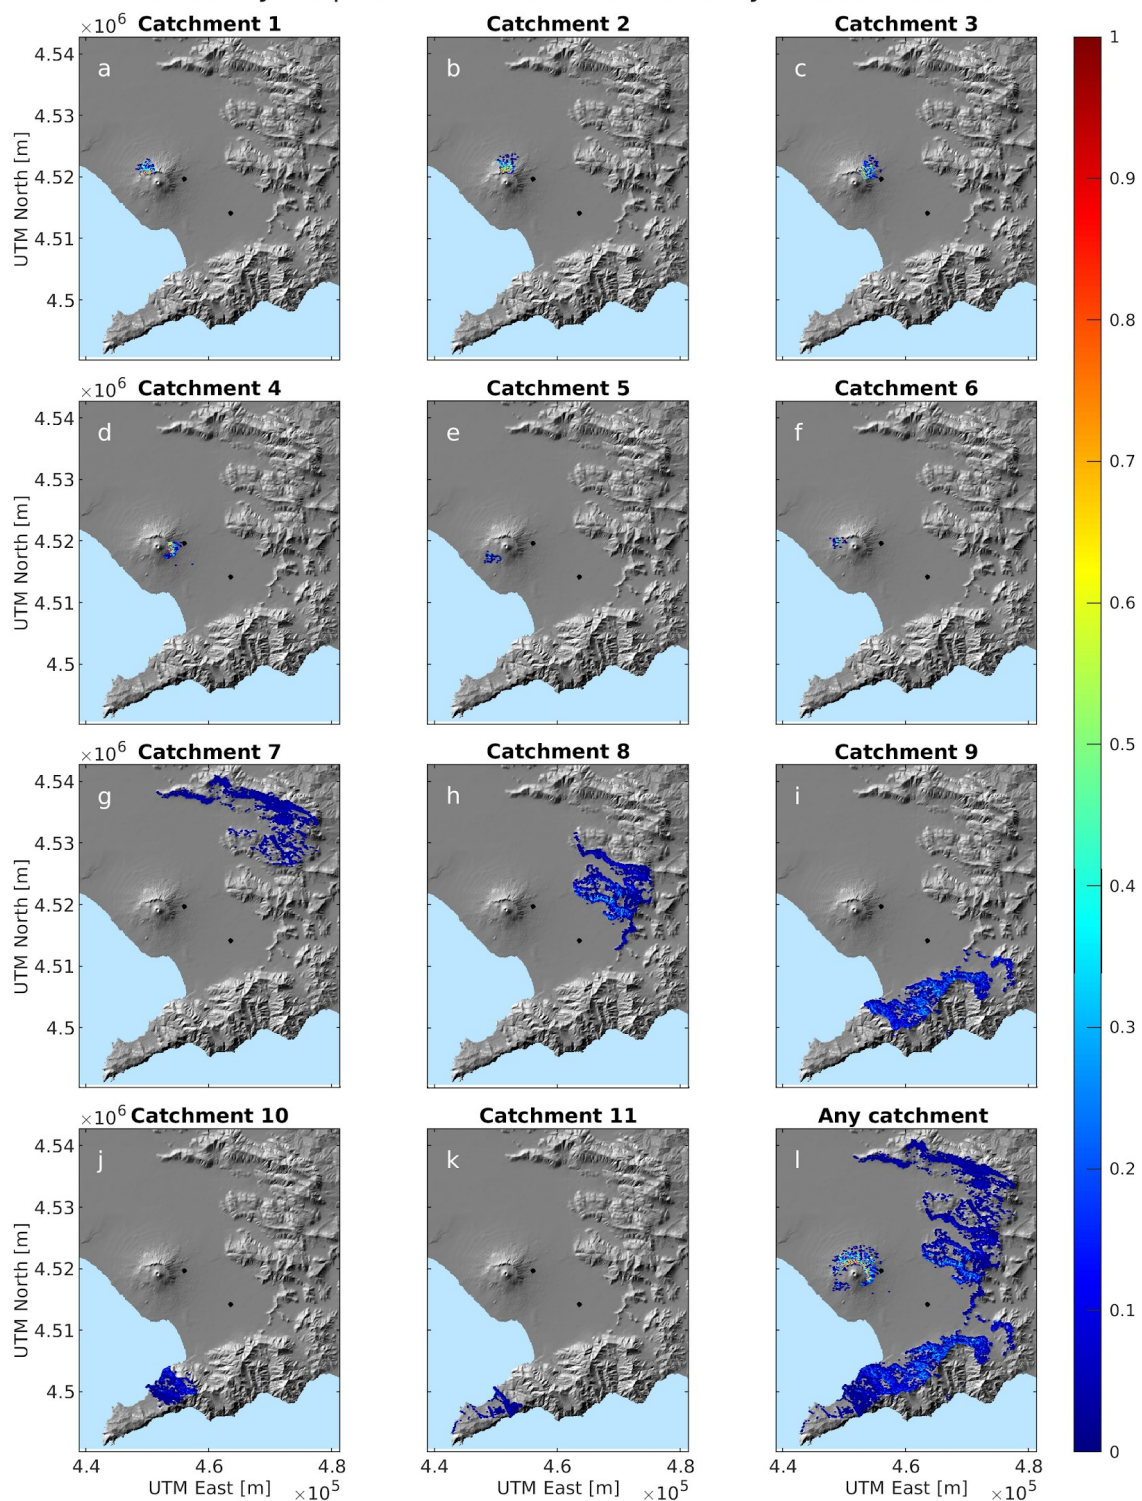

Figure SM36: Probability maps for dynamic pressure larger than 30 kPa

Probability map for FlowThick = 0.1m and DynPress = 0kPa

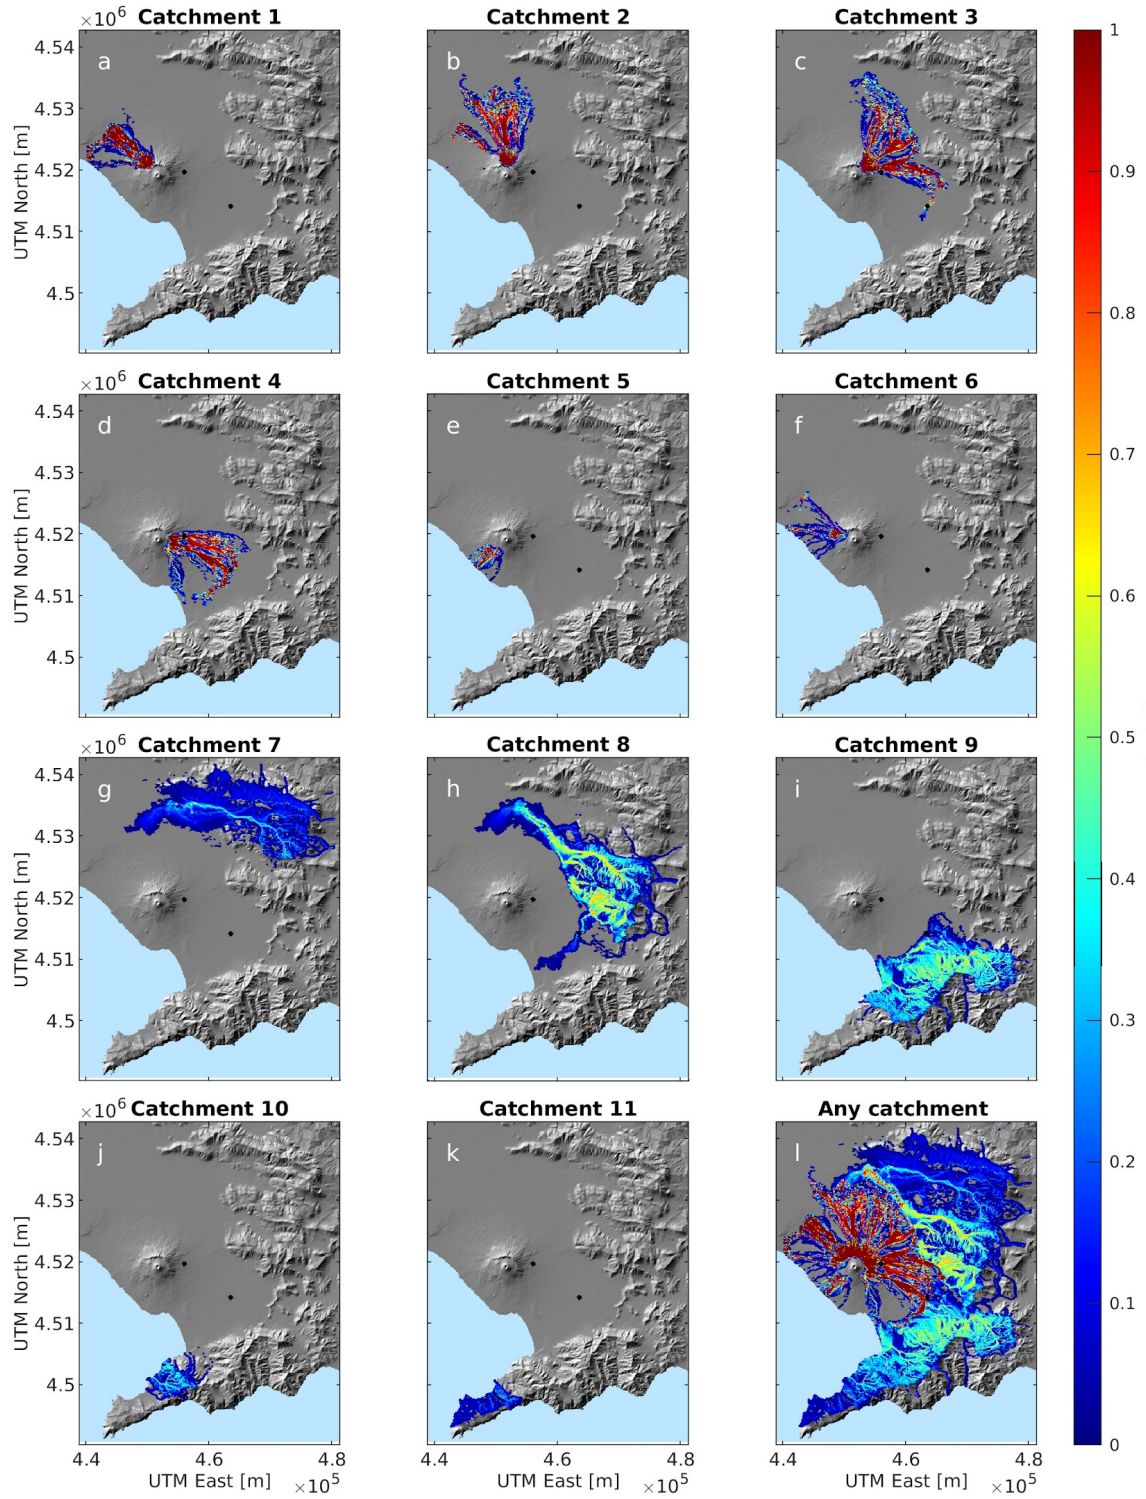

Figure SM37: Probability maps for overcoming a maximum flow thickness of 0.1 m

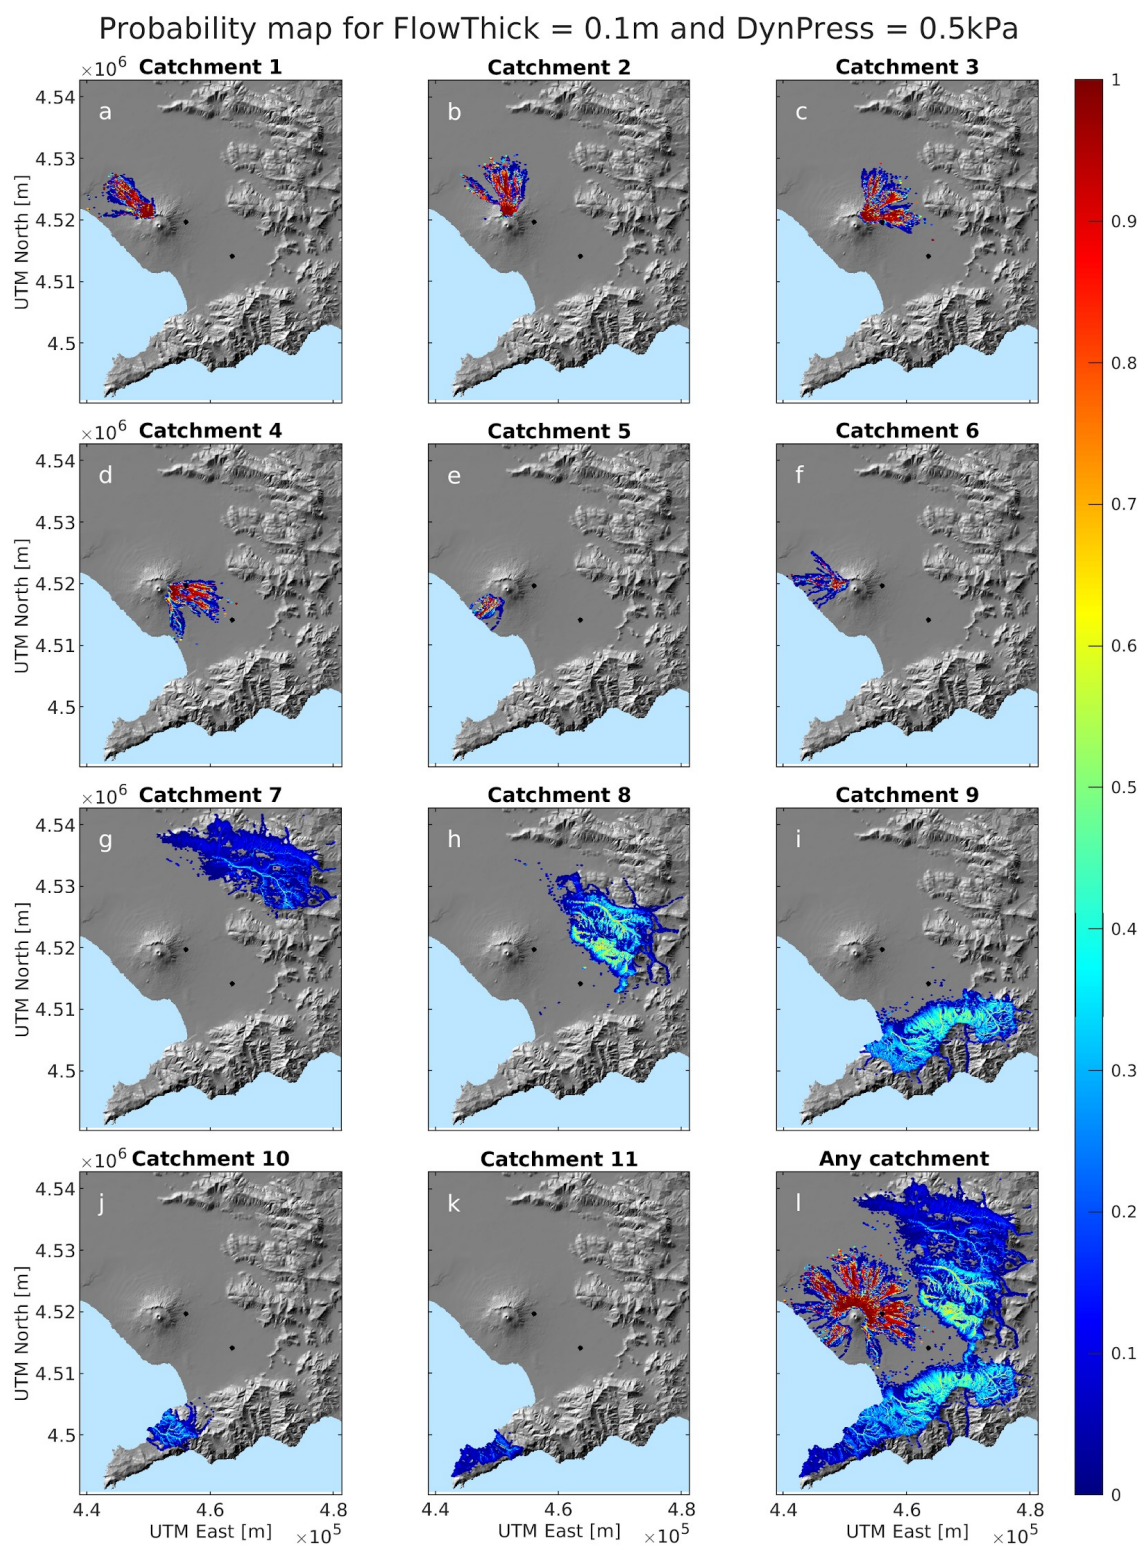

Figure SM38: Probability maps for simultaneously overcoming a maximum flow thickness of 0.1 m and a dynamic pressure of 0.5kPa

Probability map for FlowThick = 0.1m and DynPress = 1kPa

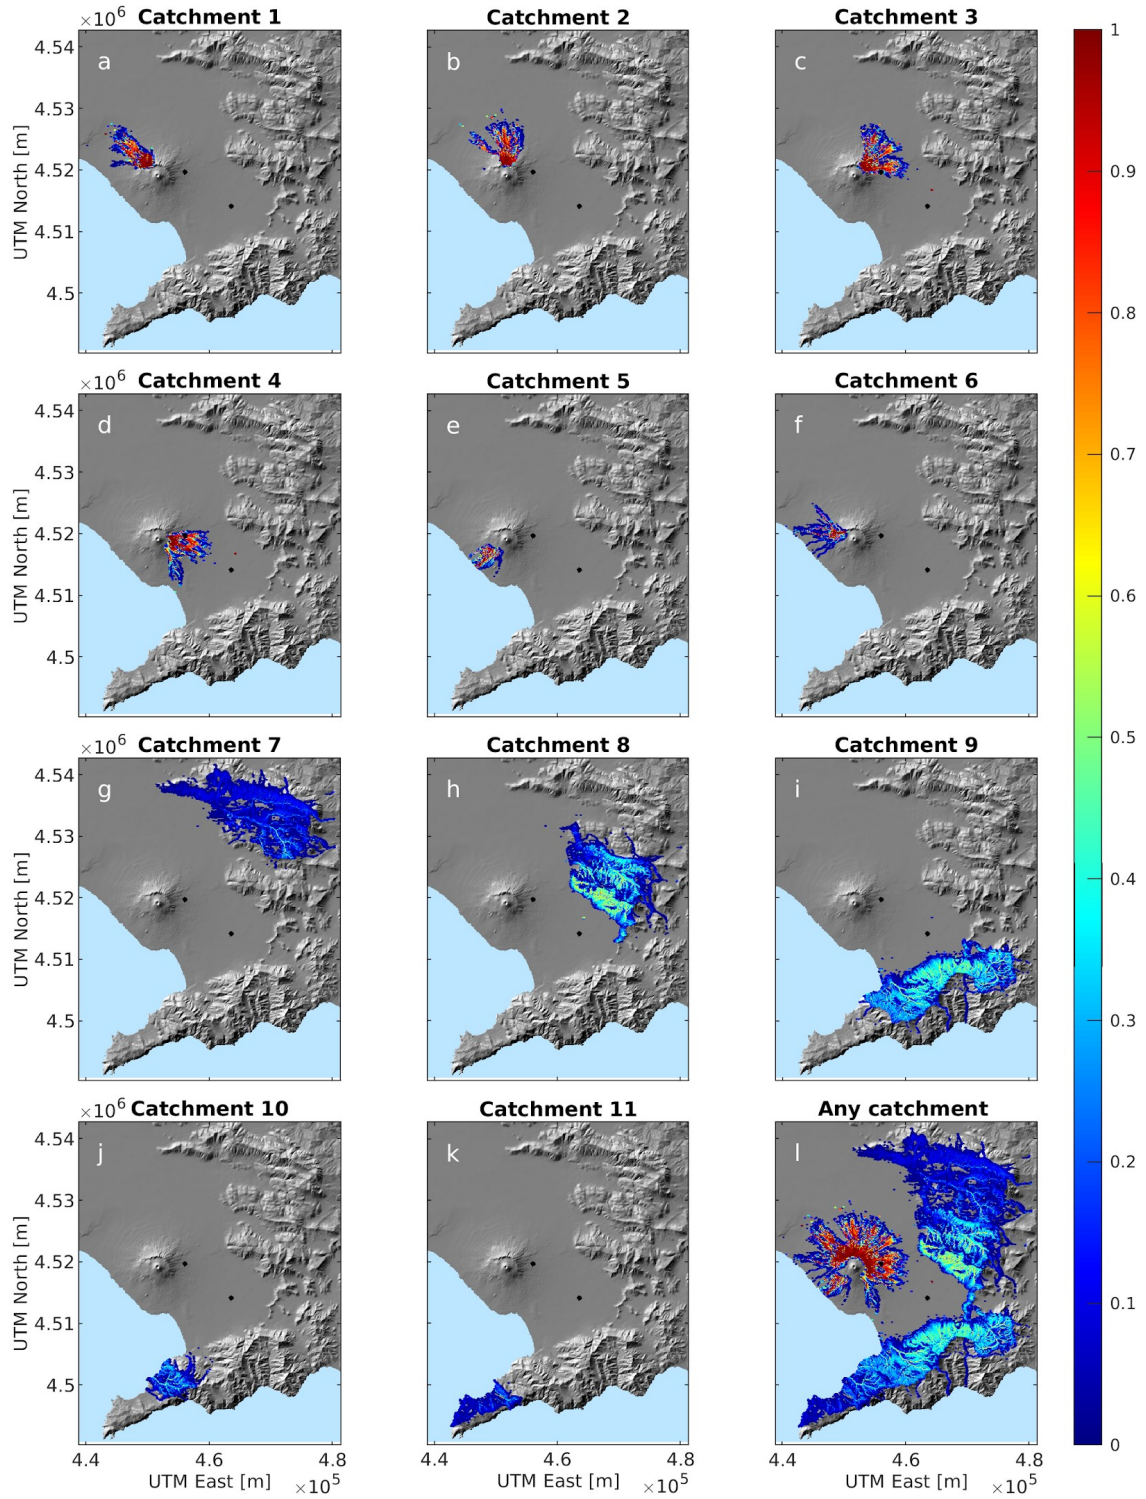

Figure SM39: Probability maps for simultaneously overcoming a maximum flow thickness of 0.1 m and a dynamic pressure of 1kPa



Probability map for FlowThick = 0.1m and DynPress = 2kPa

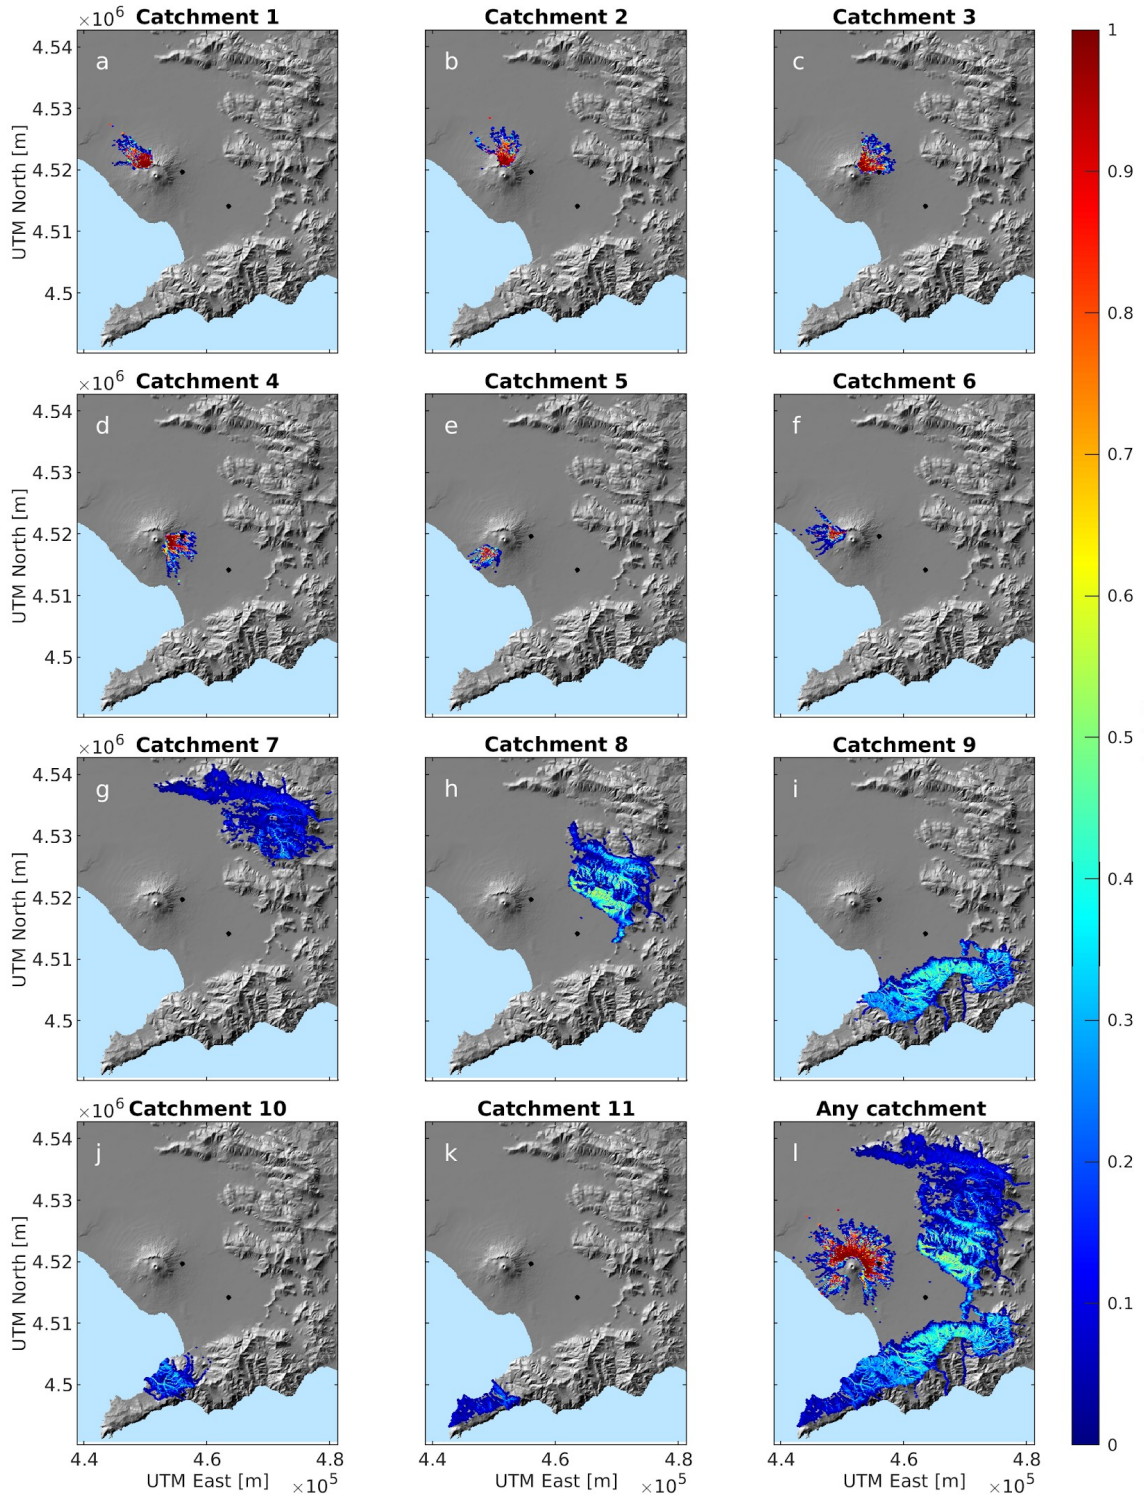

Figure SM40: Probability maps for simultaneously overcoming a maximum flow thickness of 0.1 m and a dynamic pressure of 2kPa

Probability map for FlowThick = 0.1m and DynPress = 5kPa

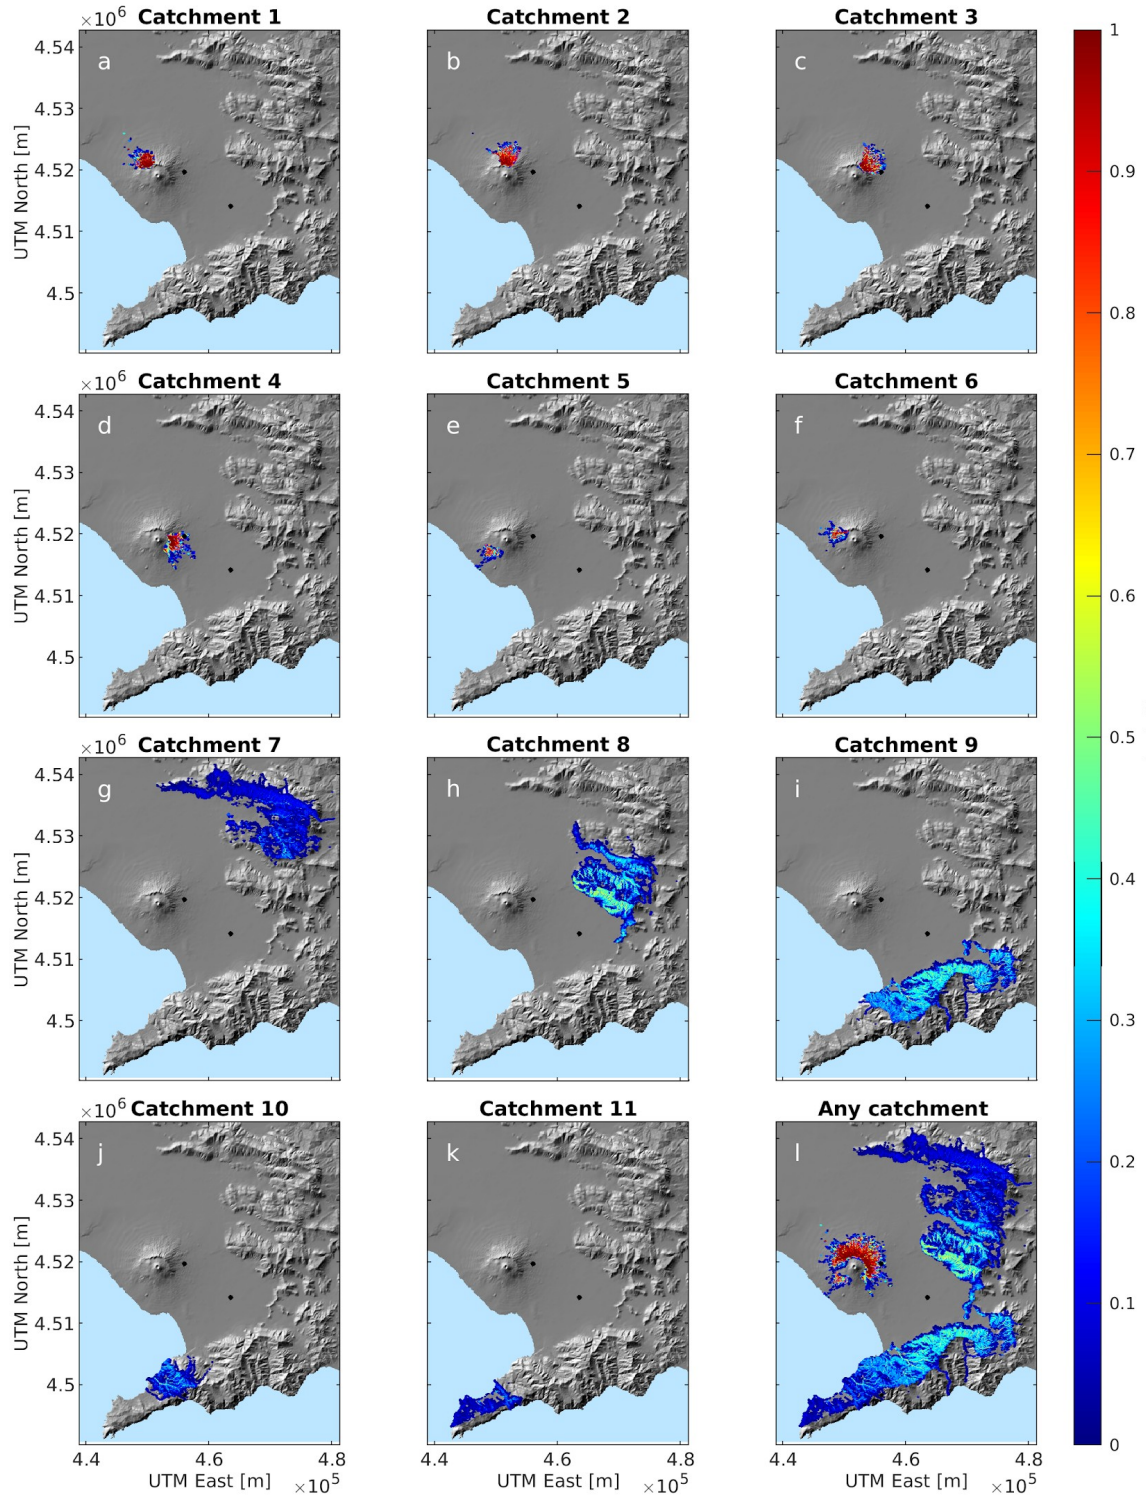

Figure SM41: Probability maps for simultaneously overcoming a maximum flow thickness of 0.1 m and a dynamic pressure of 5kPa

Probability map for FlowThick = 0.1m and DynPress = 30kPa

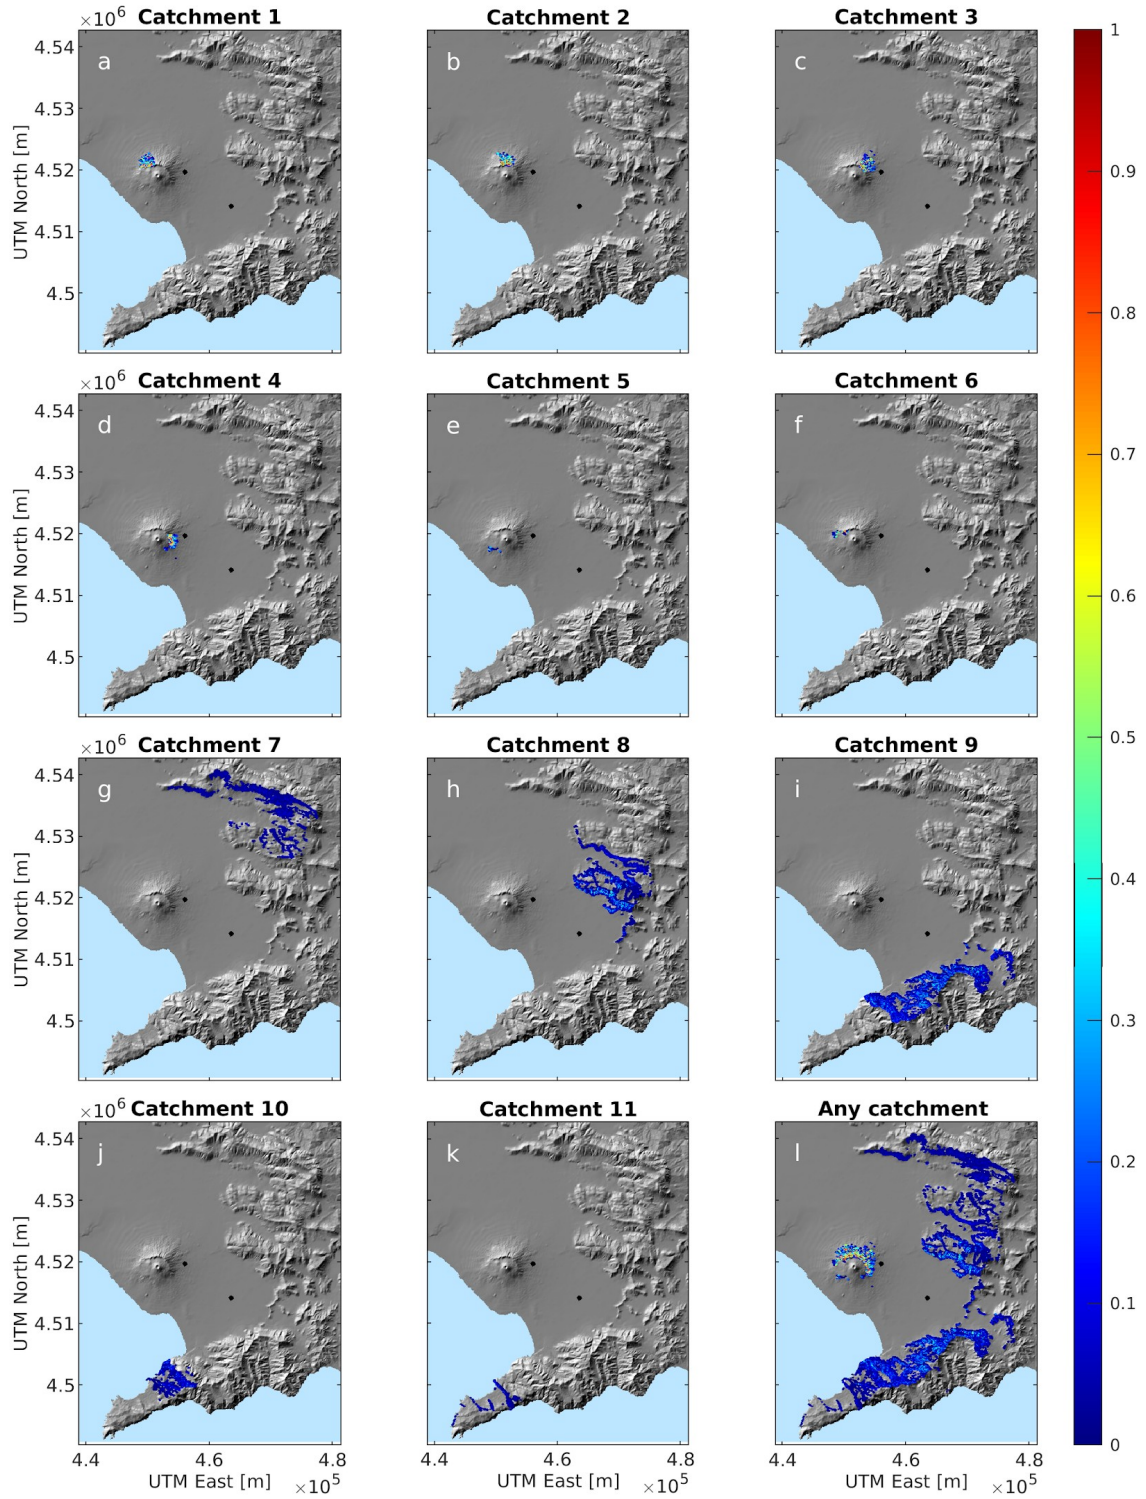

Figure SM42: Probability maps for simultaneously overcoming a maximum flow thickness of 0.1 m and a dynamic pressure of 30kPa

Probability map for FlowThick = 0.5m and DynPress = 0kPa

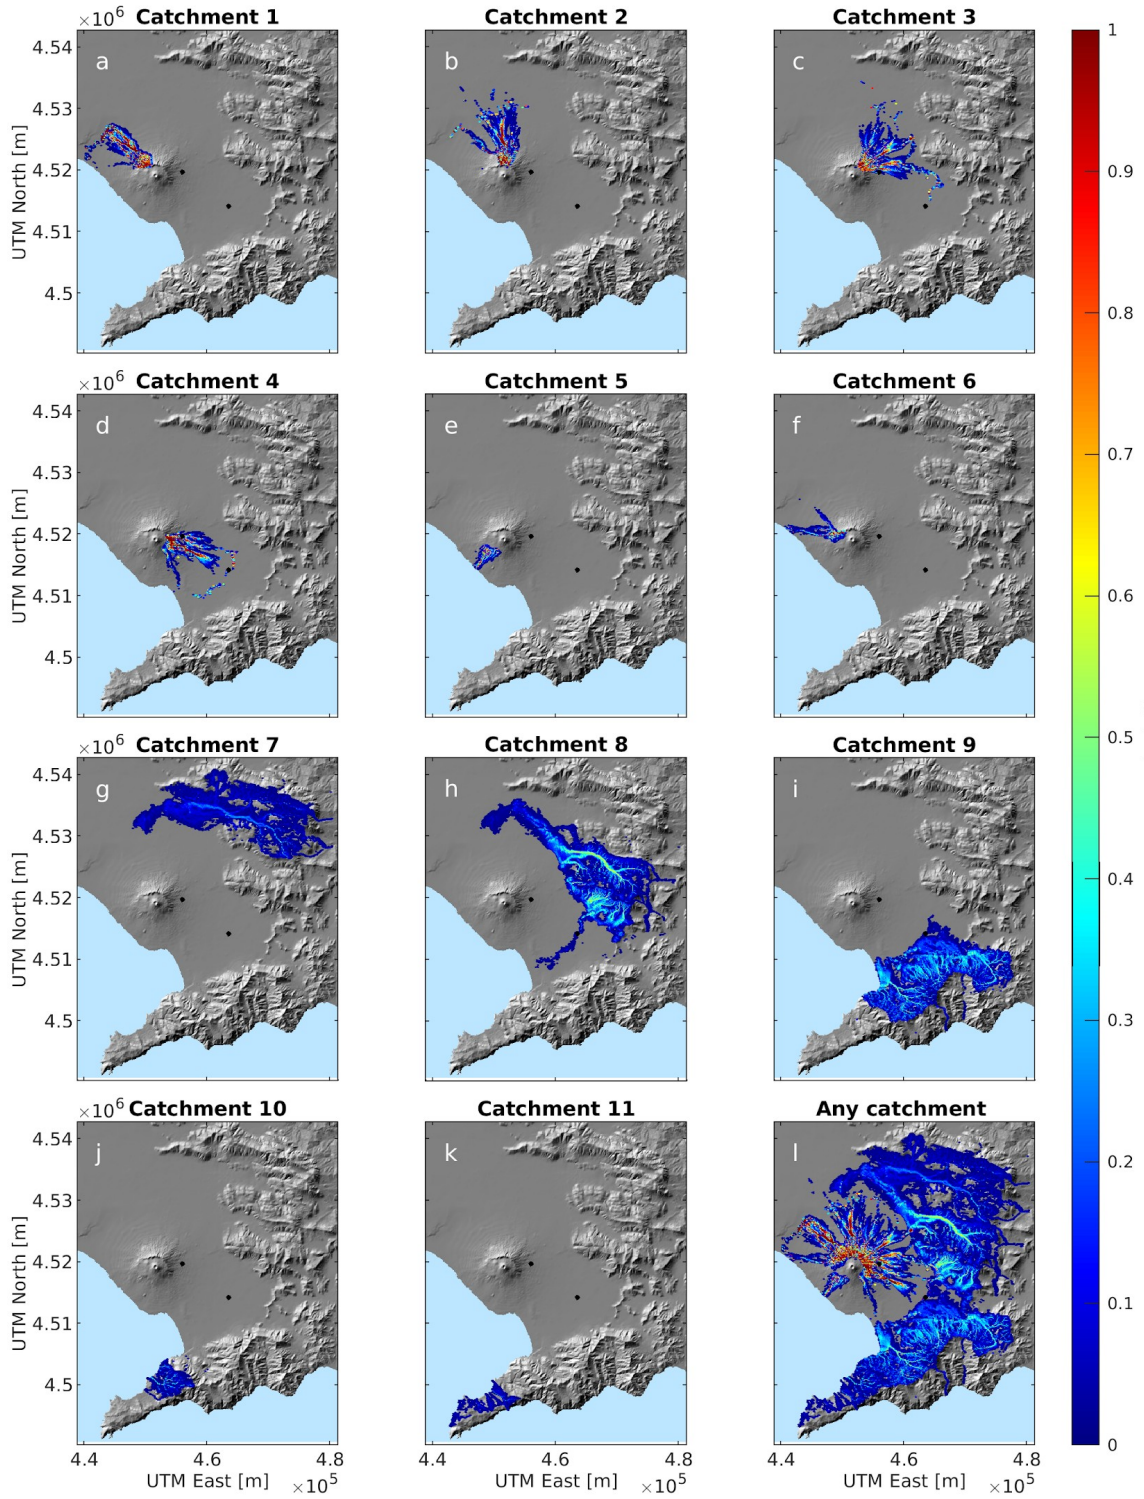

Figure SM43: Probability maps for overcoming a maximum flow thickness of 0.5 m

Probability map for FlowThick = 0.5m and DynPress = 0.5kPa

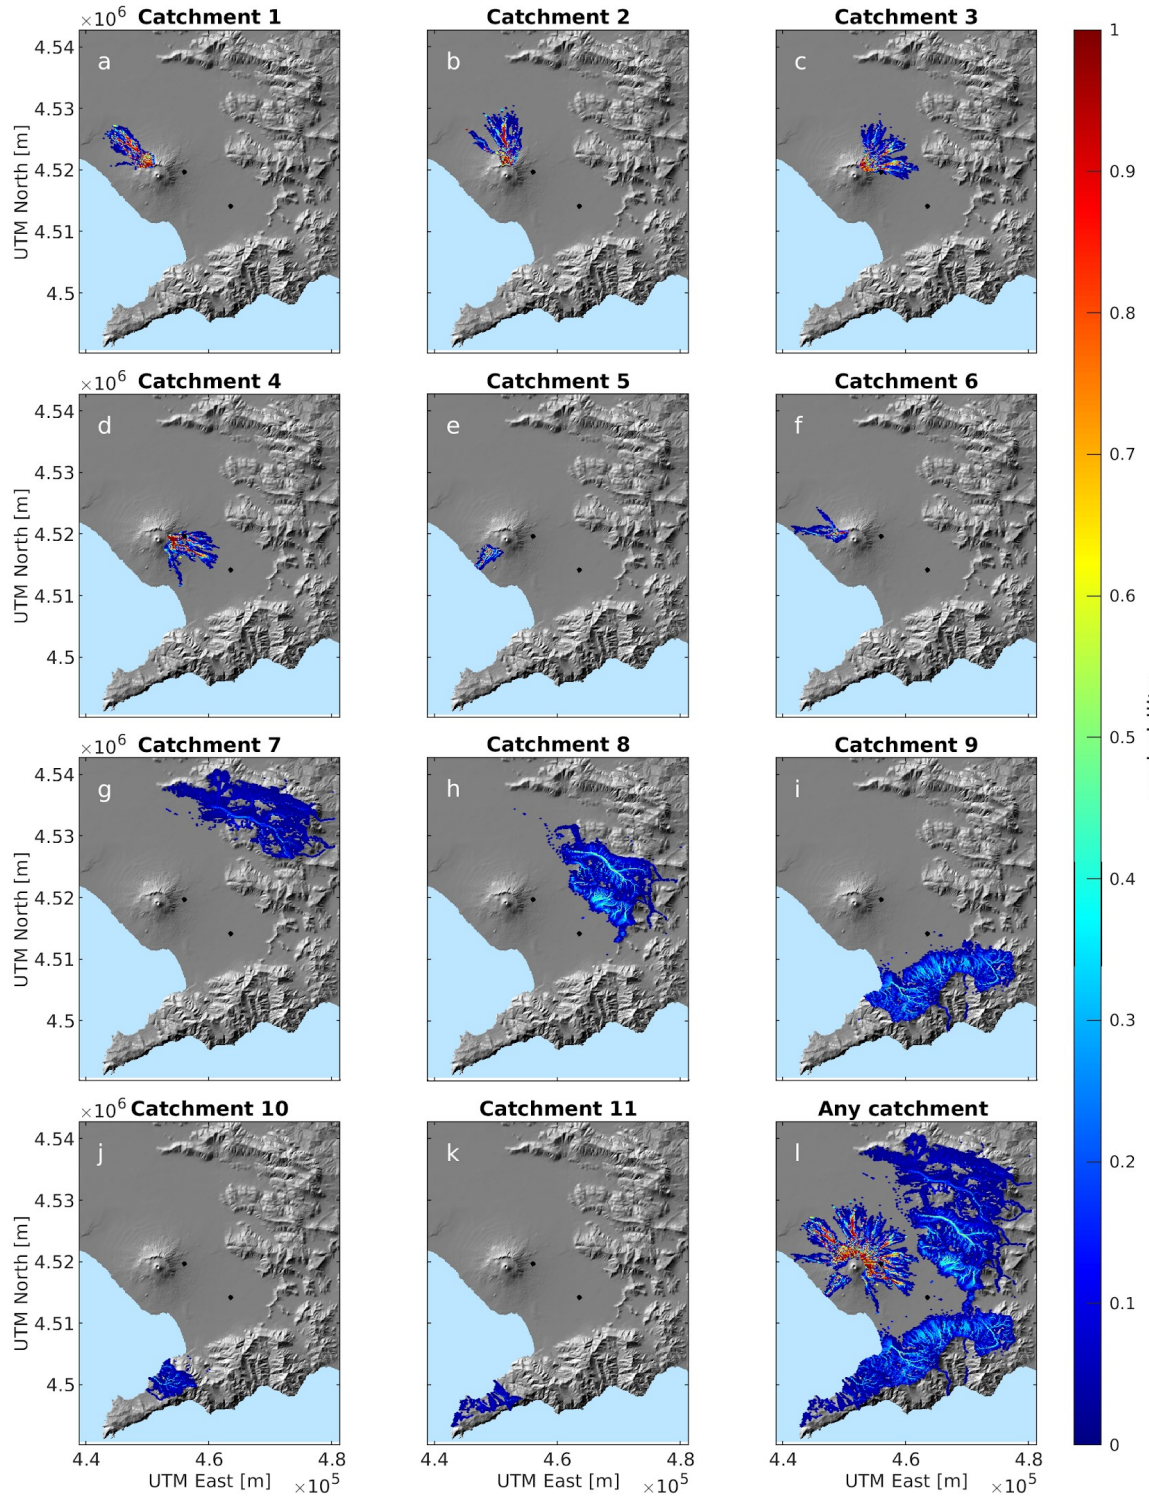

Figure SM44: Probability maps for simultaneously overcoming a maximum flow thickness of 0.5 m and a dynamic pressure of 0.5kPa

Probability map for FlowThick = 0.5m and DynPress = 2kPa

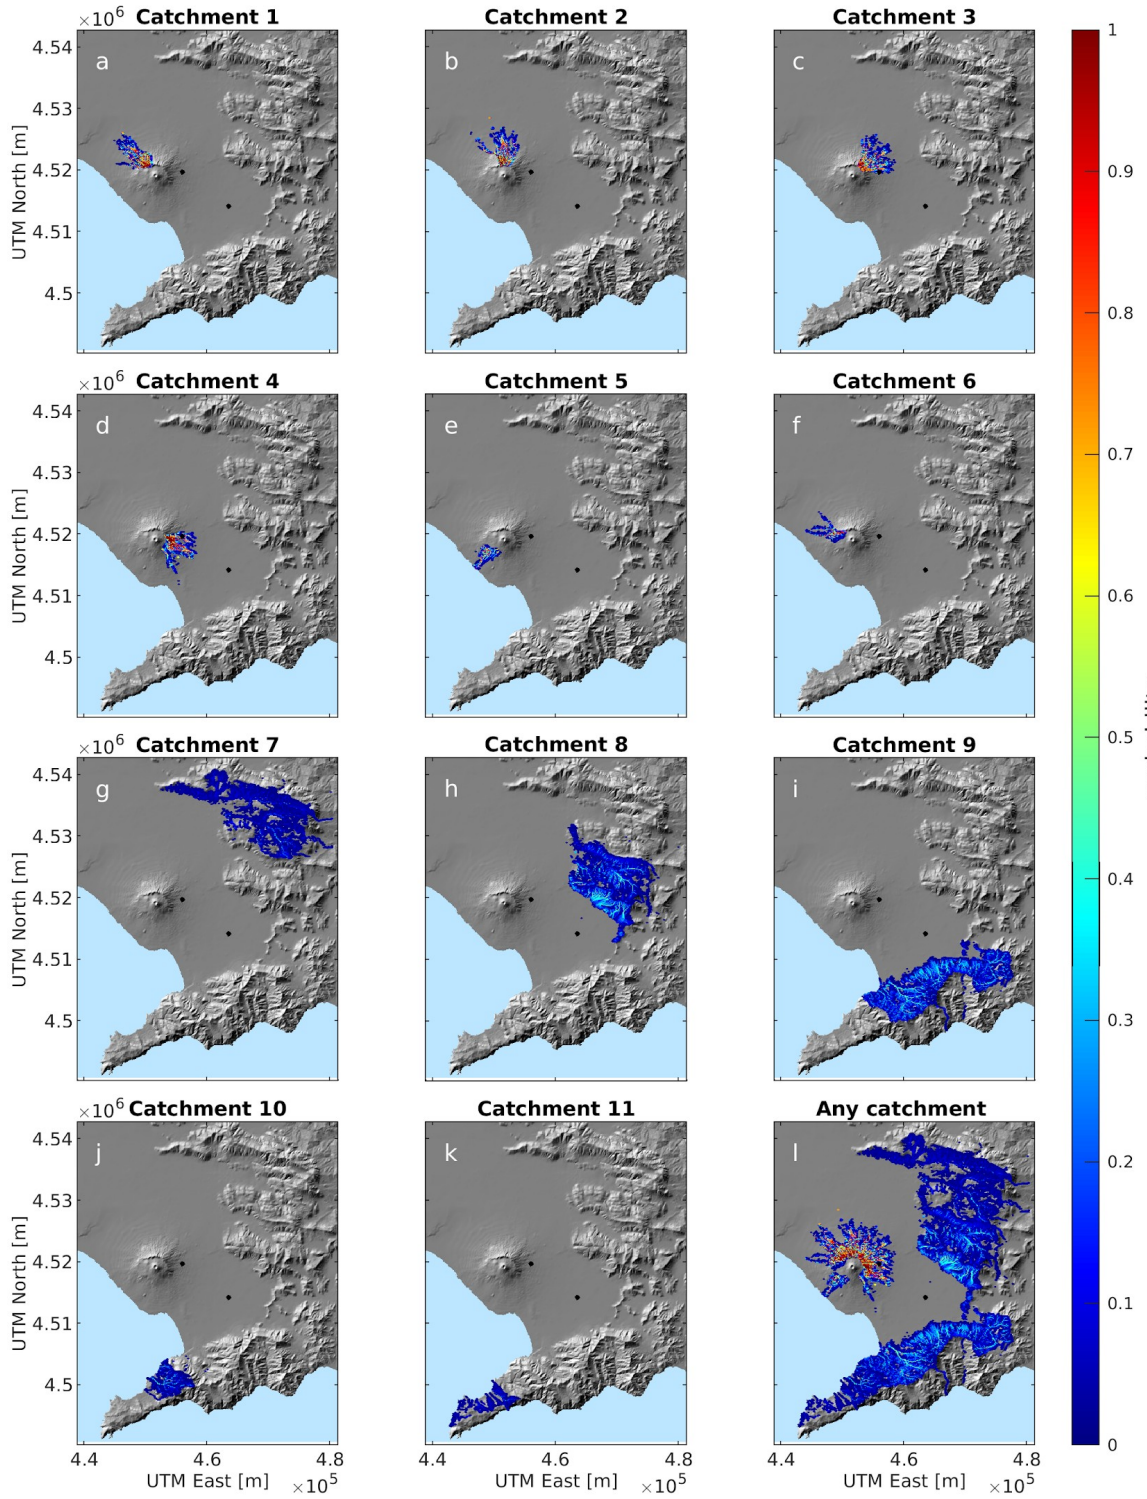

Figure SM45: Probability maps for simultaneously overcoming a maximum flow thickness of 0.5 m and a dynamic pressure of 2 kPa

Probability map for FlowThick = 0.5m and DynPress = 5kPa

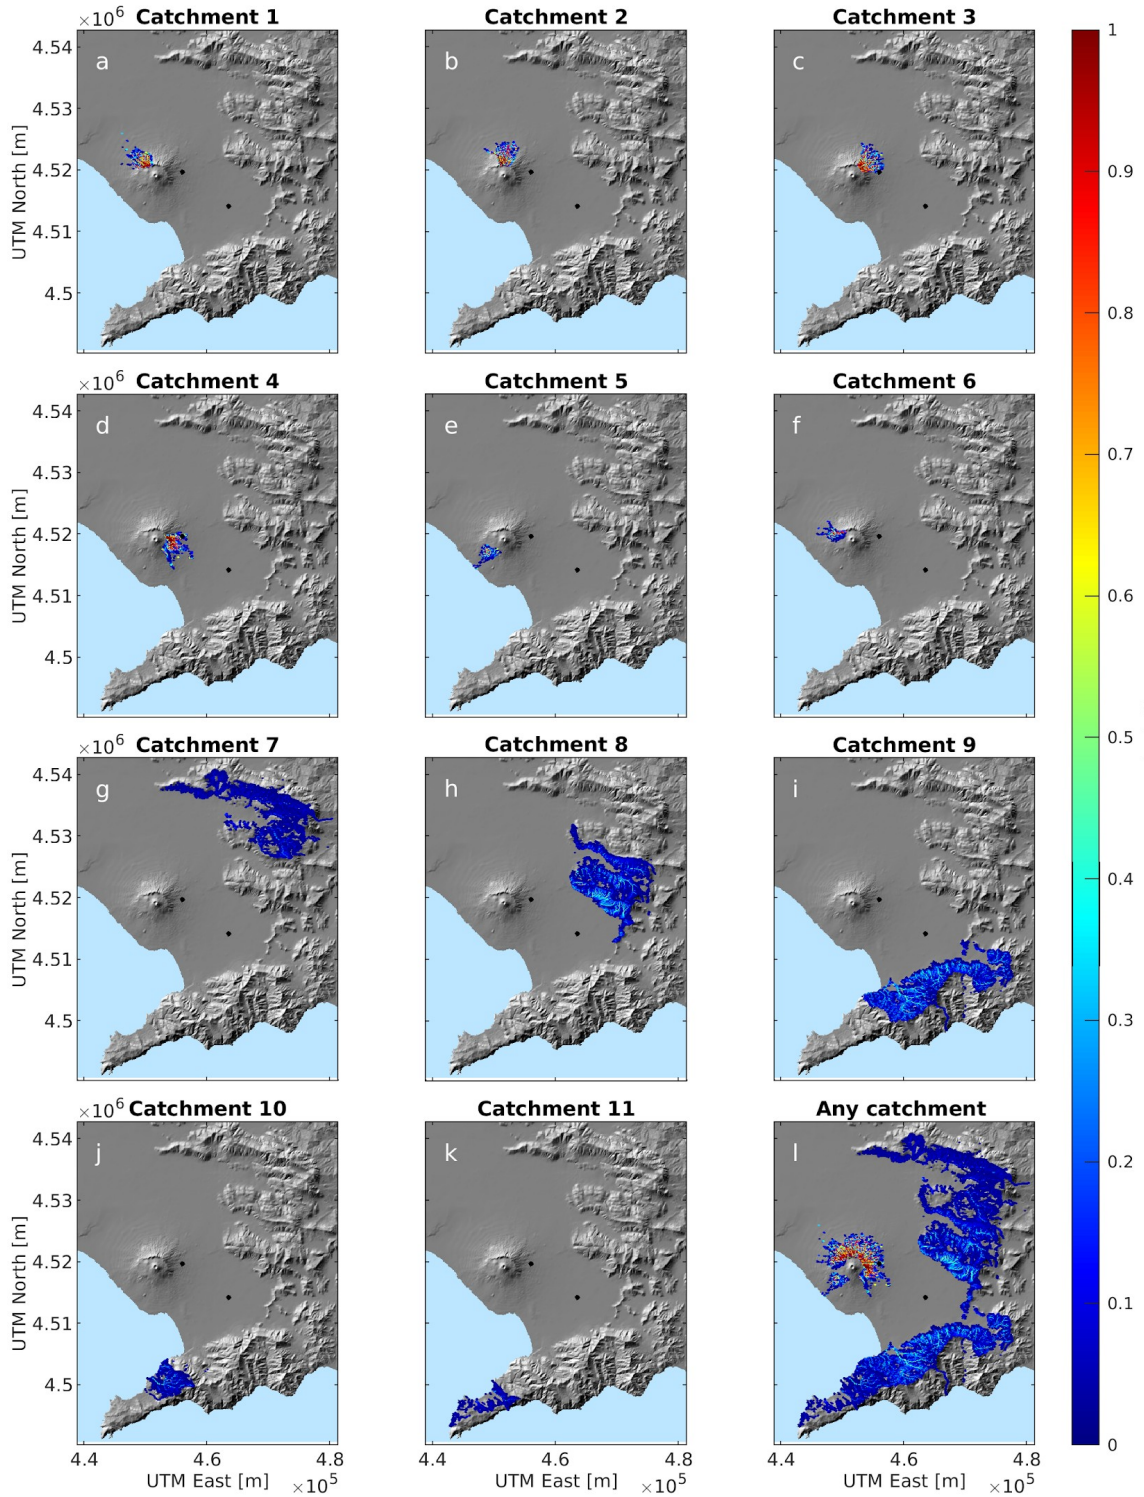

Figure SM46: Probability maps for simultaneously overcoming a maximum flow thickness of 0.5 m and a dynamic pressure of 5 kPa

Probability map for FlowThick = 0.5m and DynPress = 30kPa

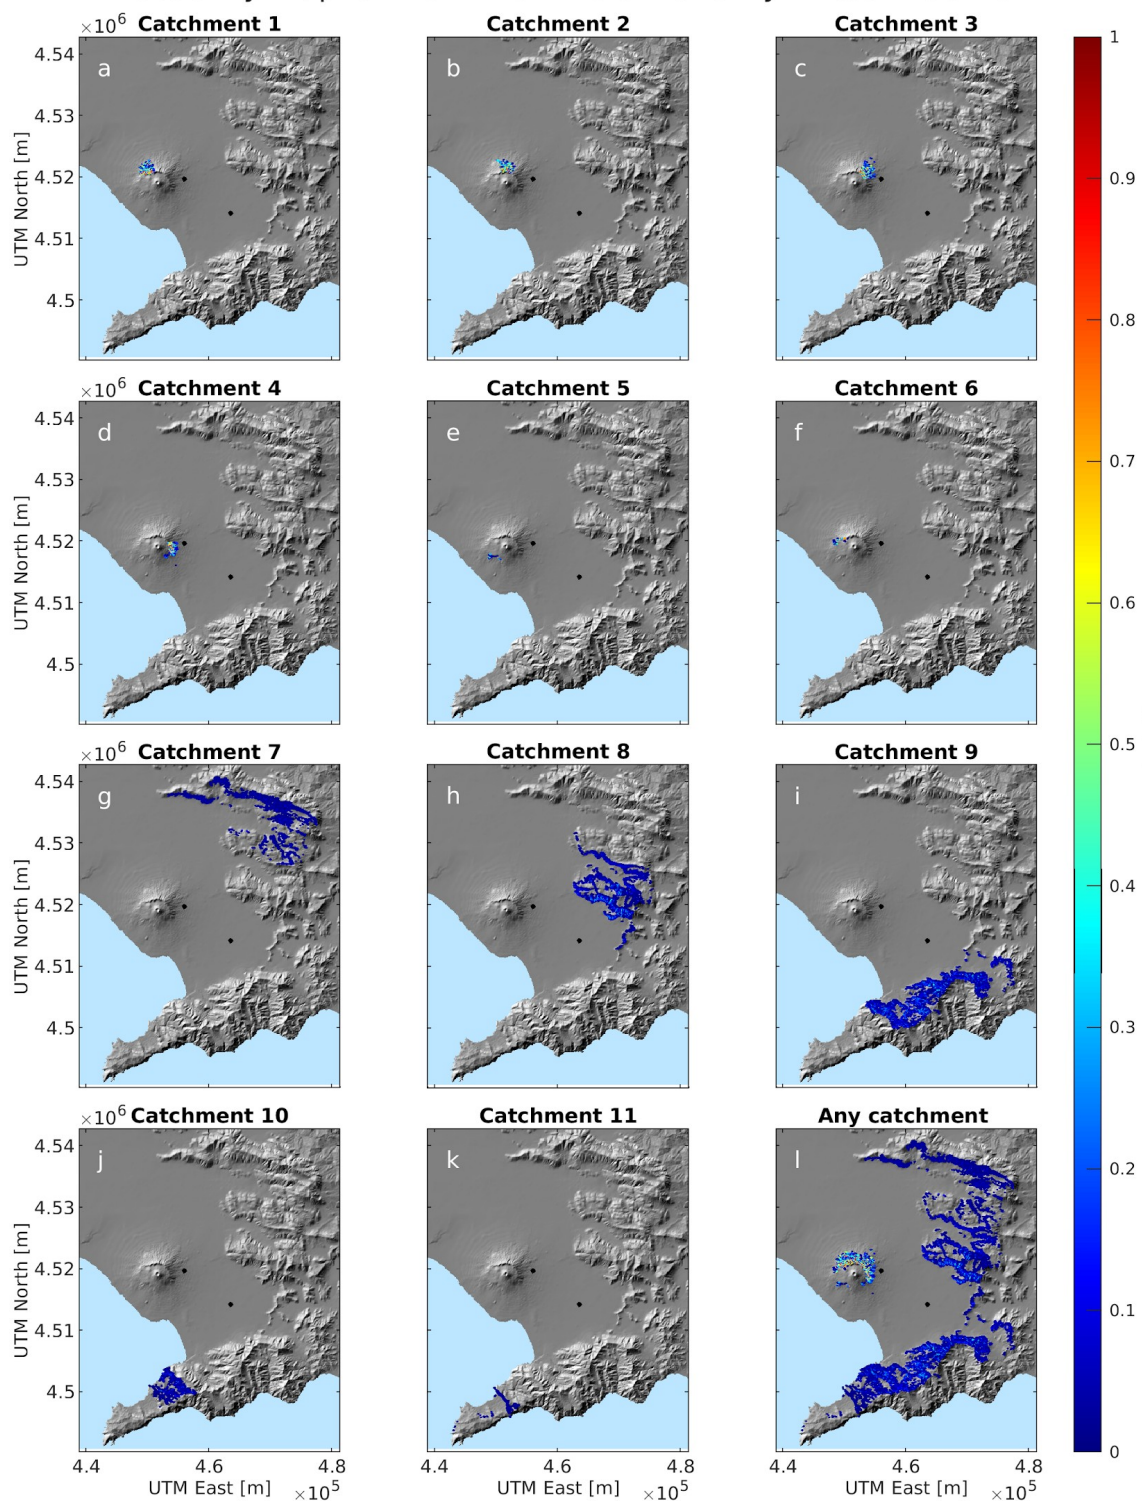

Figure SM47: Probability maps for simultaneously overcoming a maximum flow thickness of 0.5 m and a dynamic pressure of 30 kPa



Probability map for FlowThick = 1m and DynPress = 0kPa

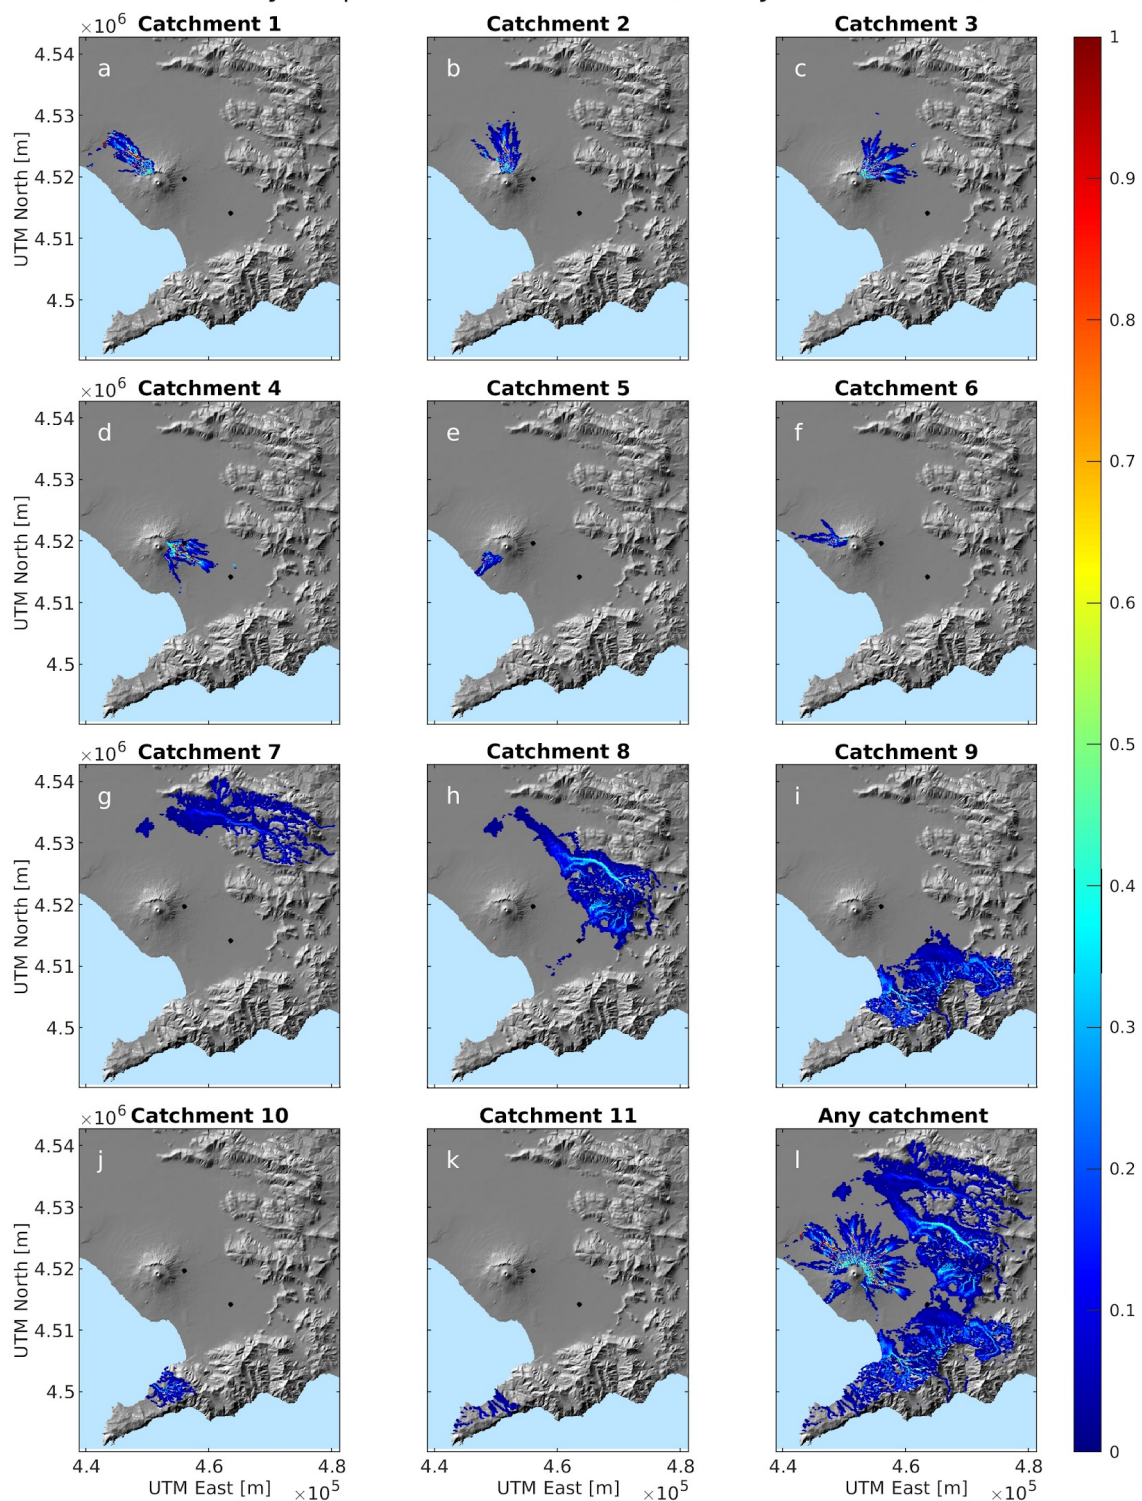

Figure SM48: Probability maps for overcoming a maximum flow thickness of 1 m

Probability map for FlowThick = 1m and DynPress = 0.5kPa

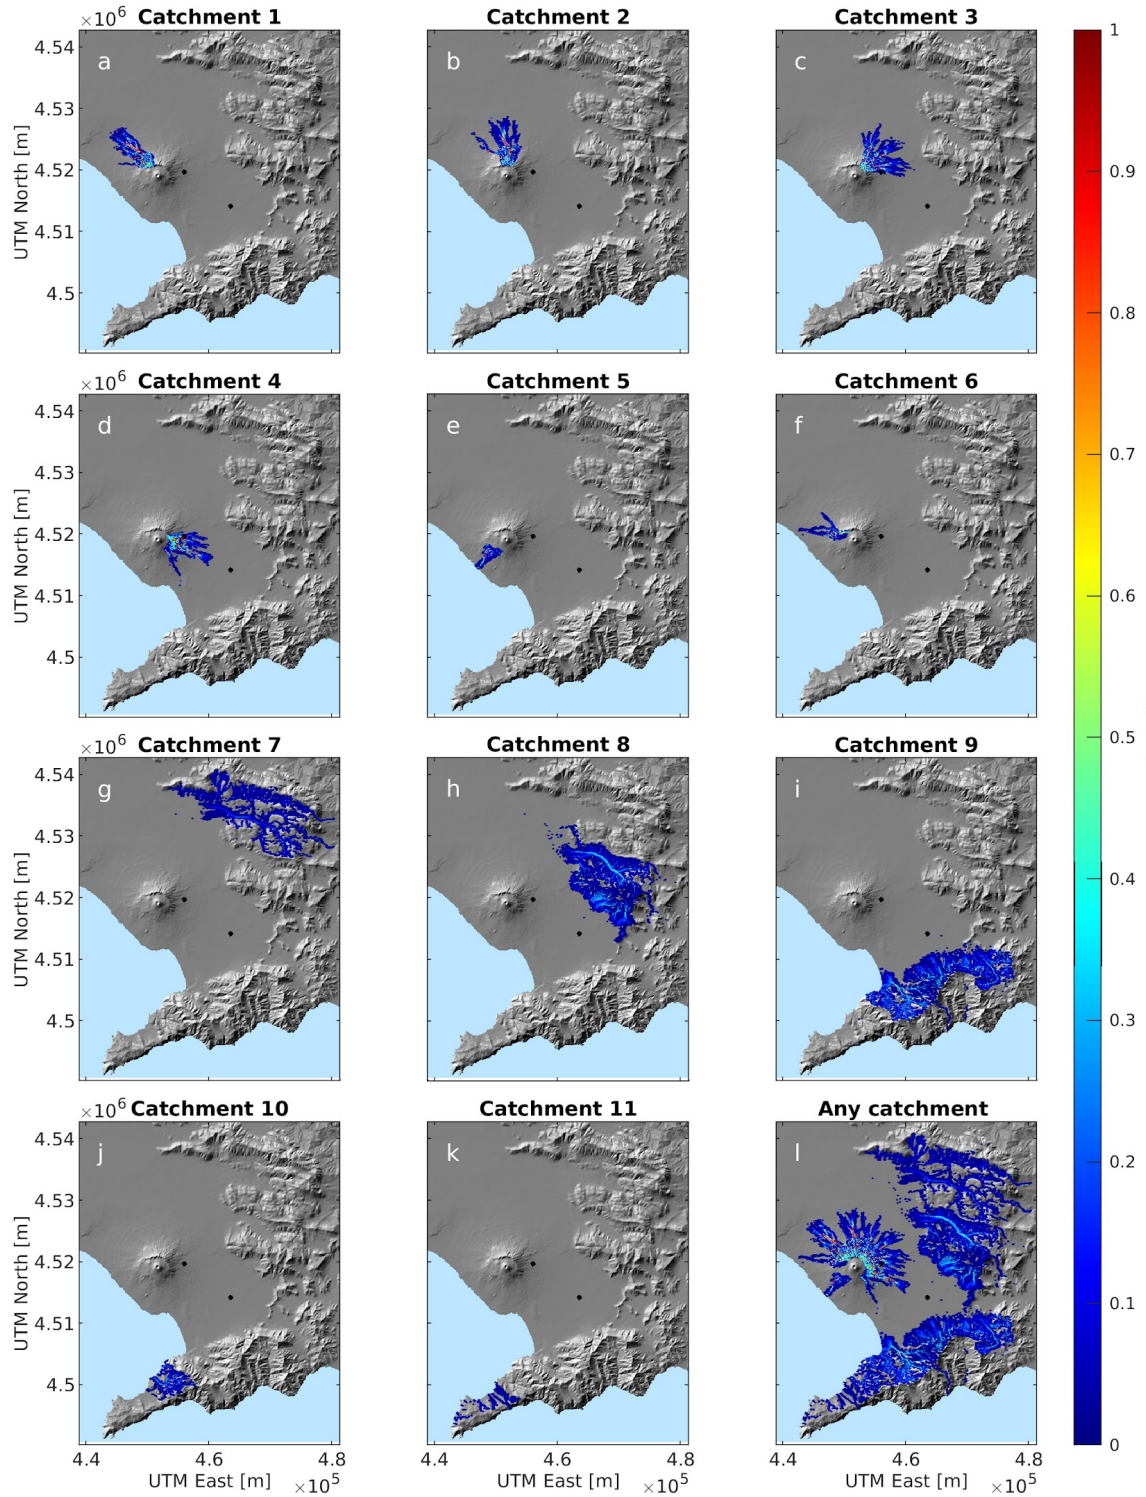

Figure SM49: Probability maps for simultaneously overcoming a maximum flow thickness of 1 m and a dynamic pressure of 0.5 kPa

Probability map for FlowThick = 1m and DynPress = 1kPa

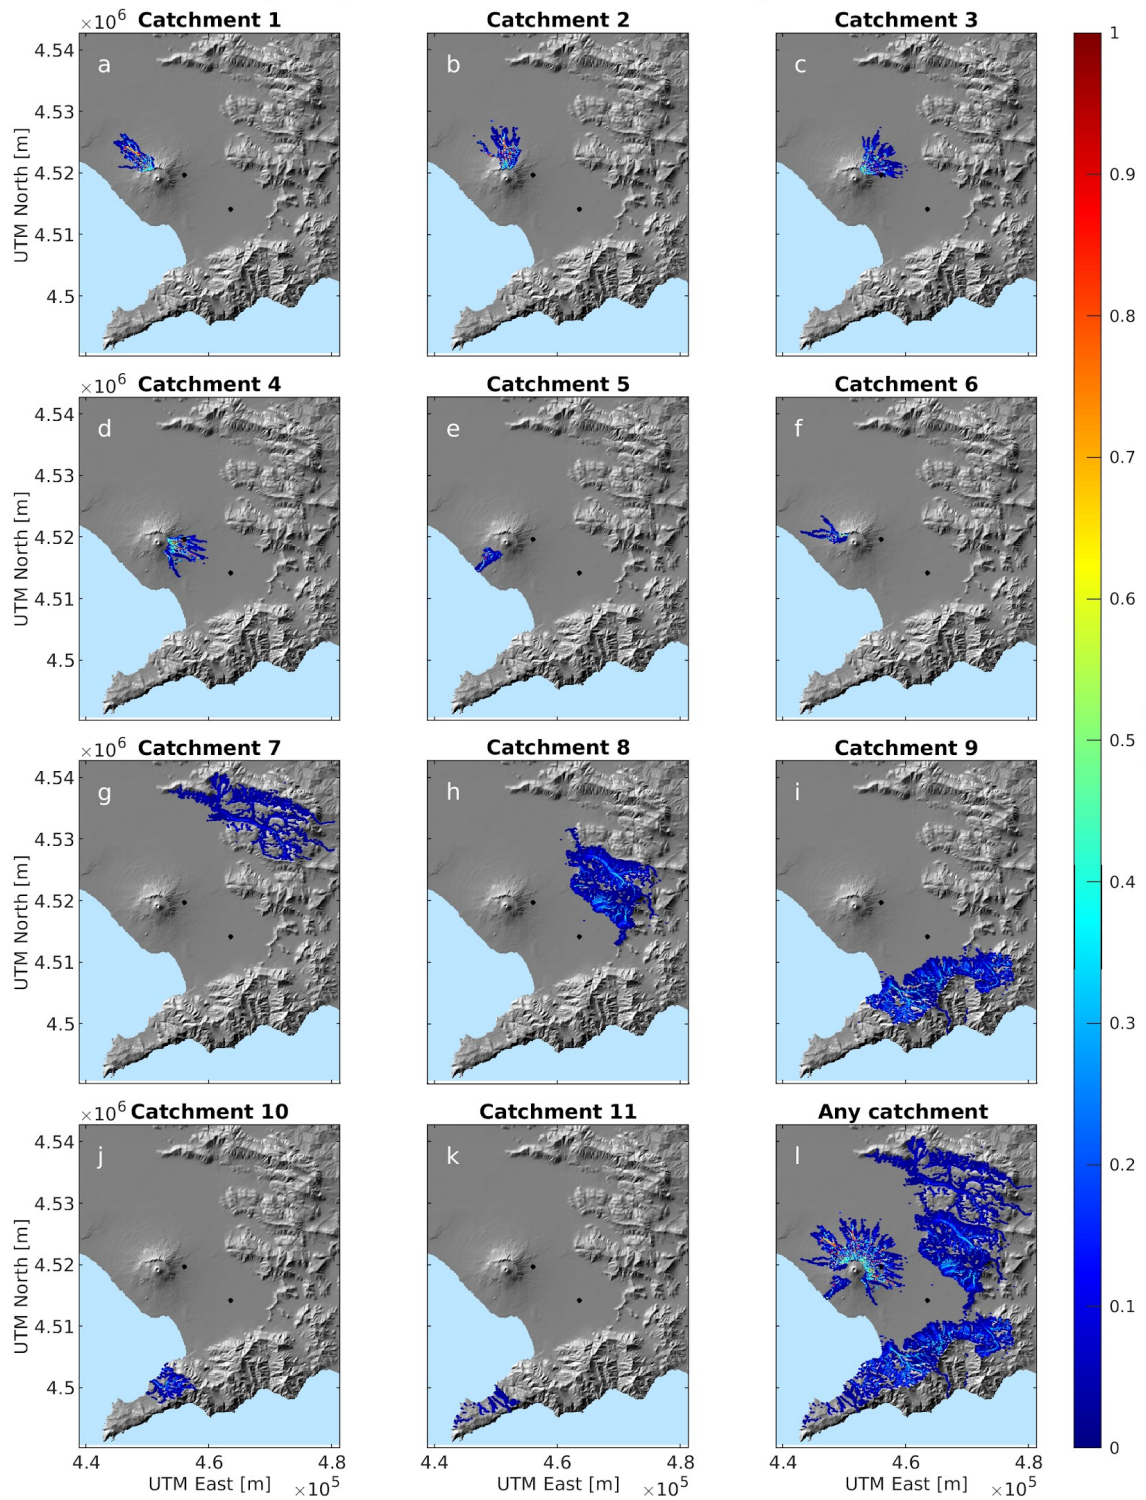

Figure SM50: Probability maps for simultaneously overcoming a maximum flow thickness of 1 m and a dynamic pressure of 1 kPa

Probability map for FlowThick = 1m and DynPress = 2kPa

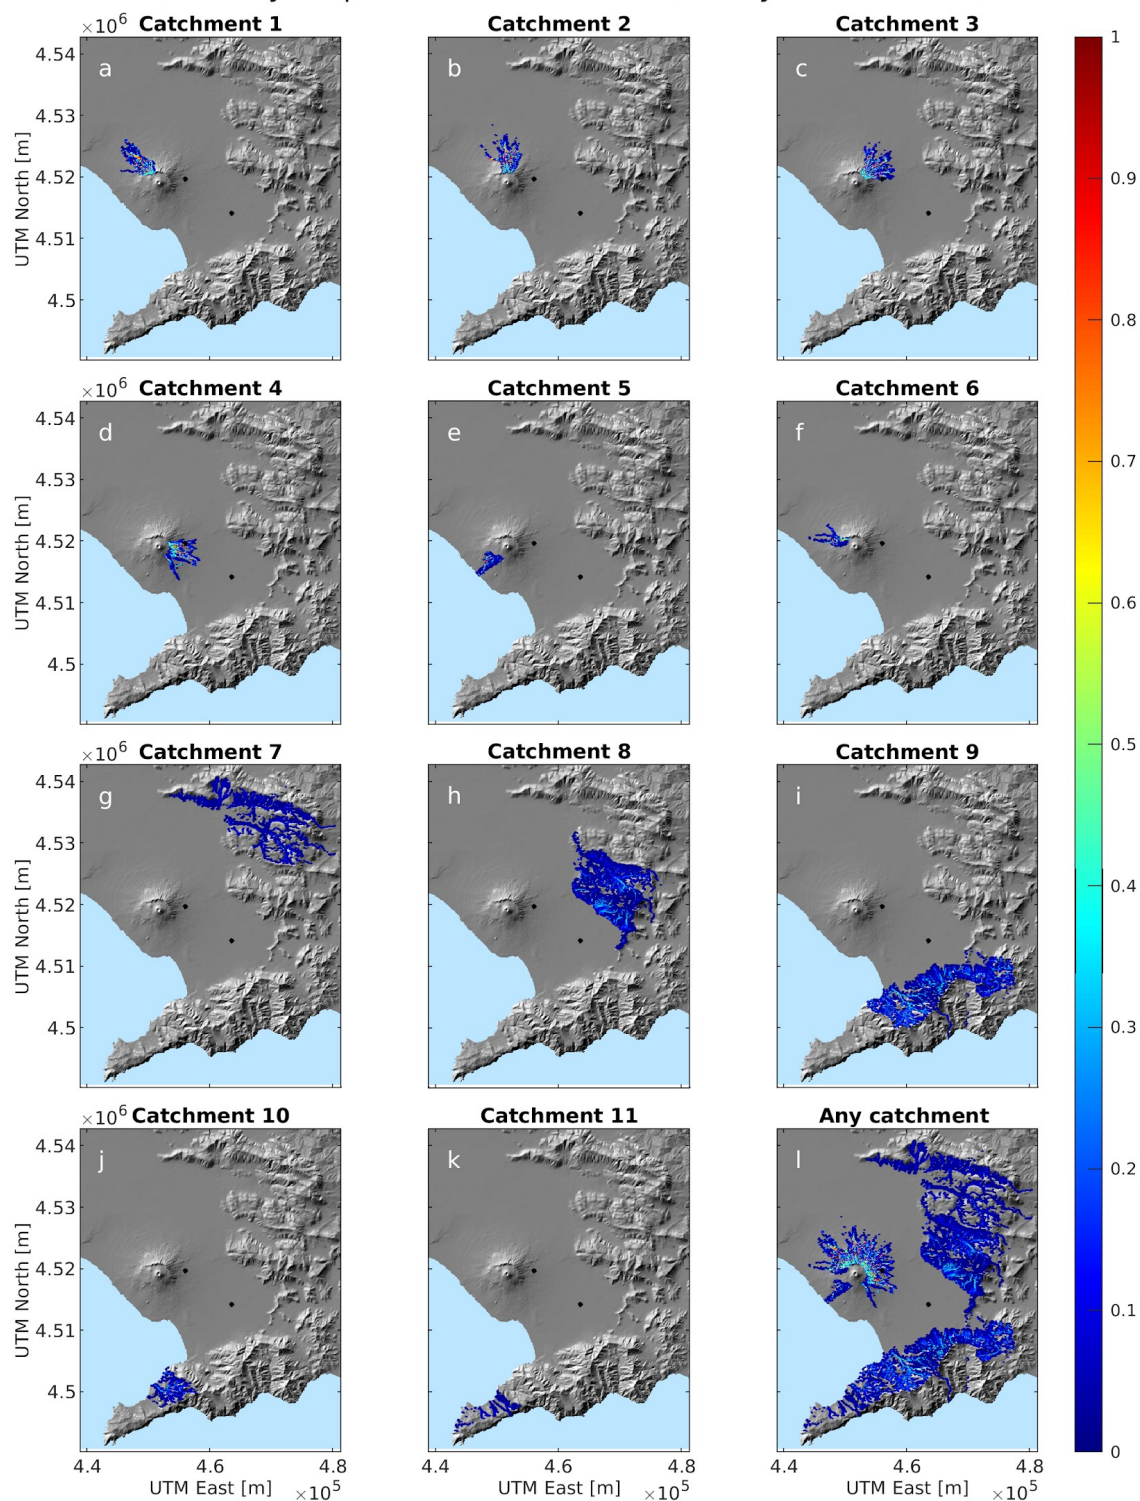

Figure SM51: Probability maps for simultaneously overcoming a maximum flow thickness of 1 m and a dynamic pressure of 2 kPa

Probability map for FlowThick = 1m and DynPress = 5kPa

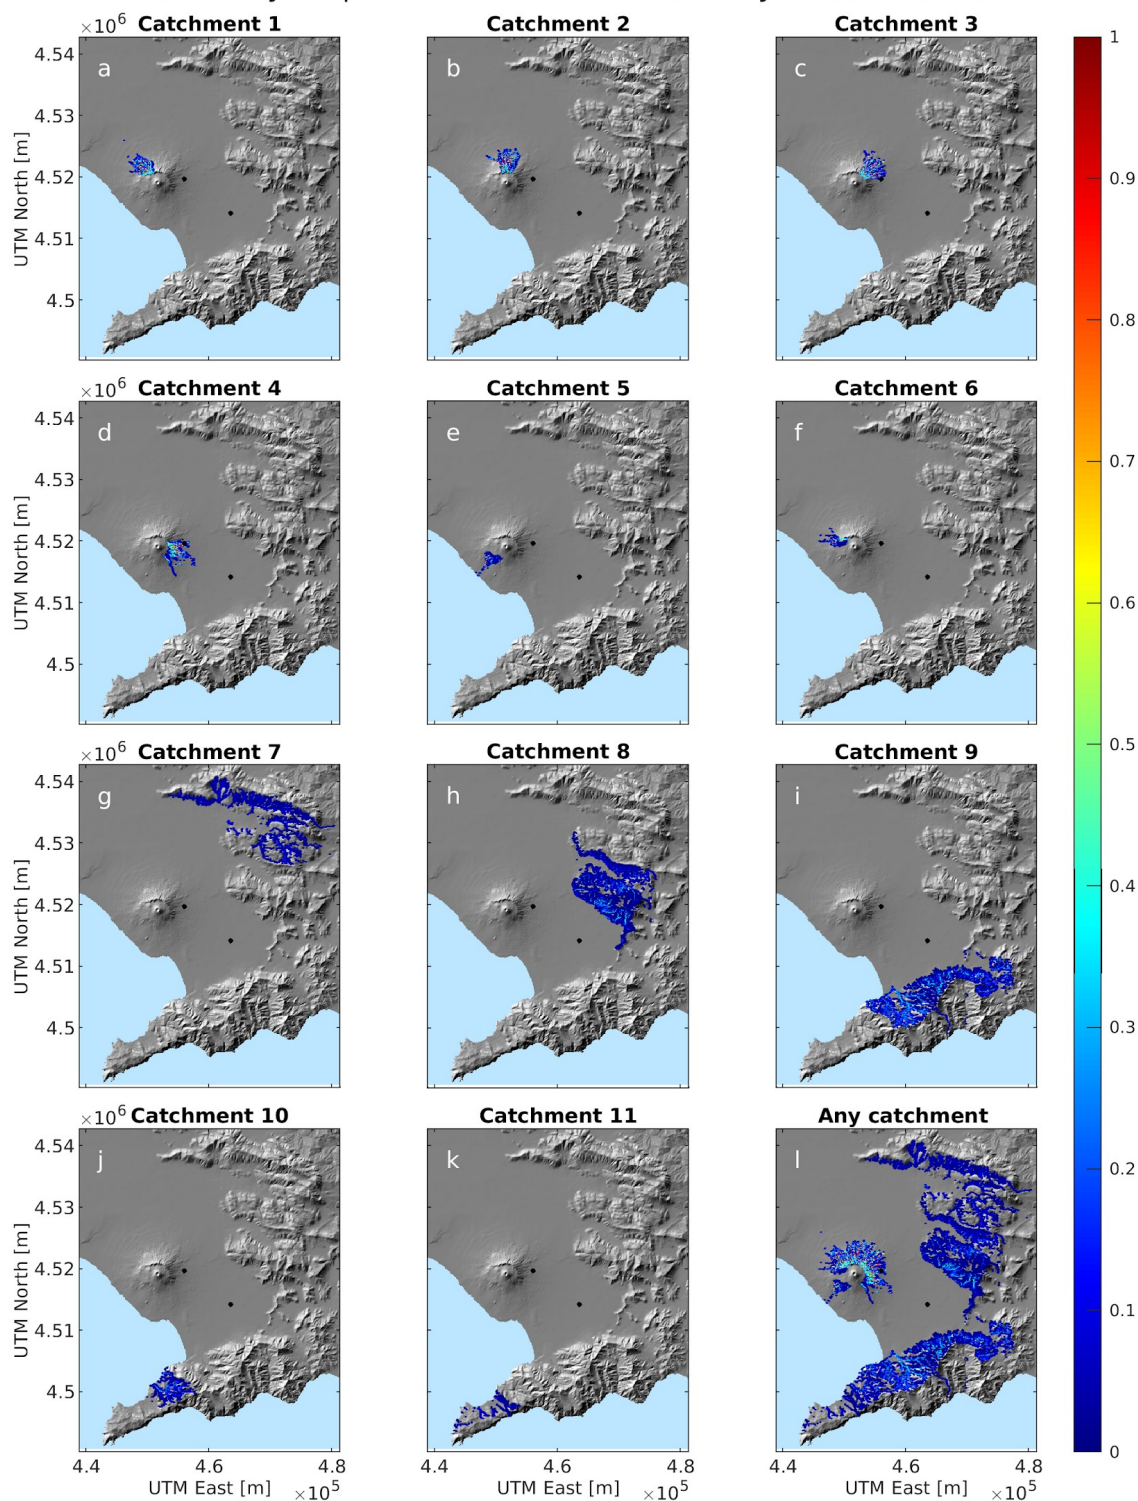

Figure SM52: Probability maps for simultaneously overcoming a maximum flow thickness of 1 m and a dynamic pressure of 5 kPa

Probability map for FlowThick = 1m and DynPress = 30kPa

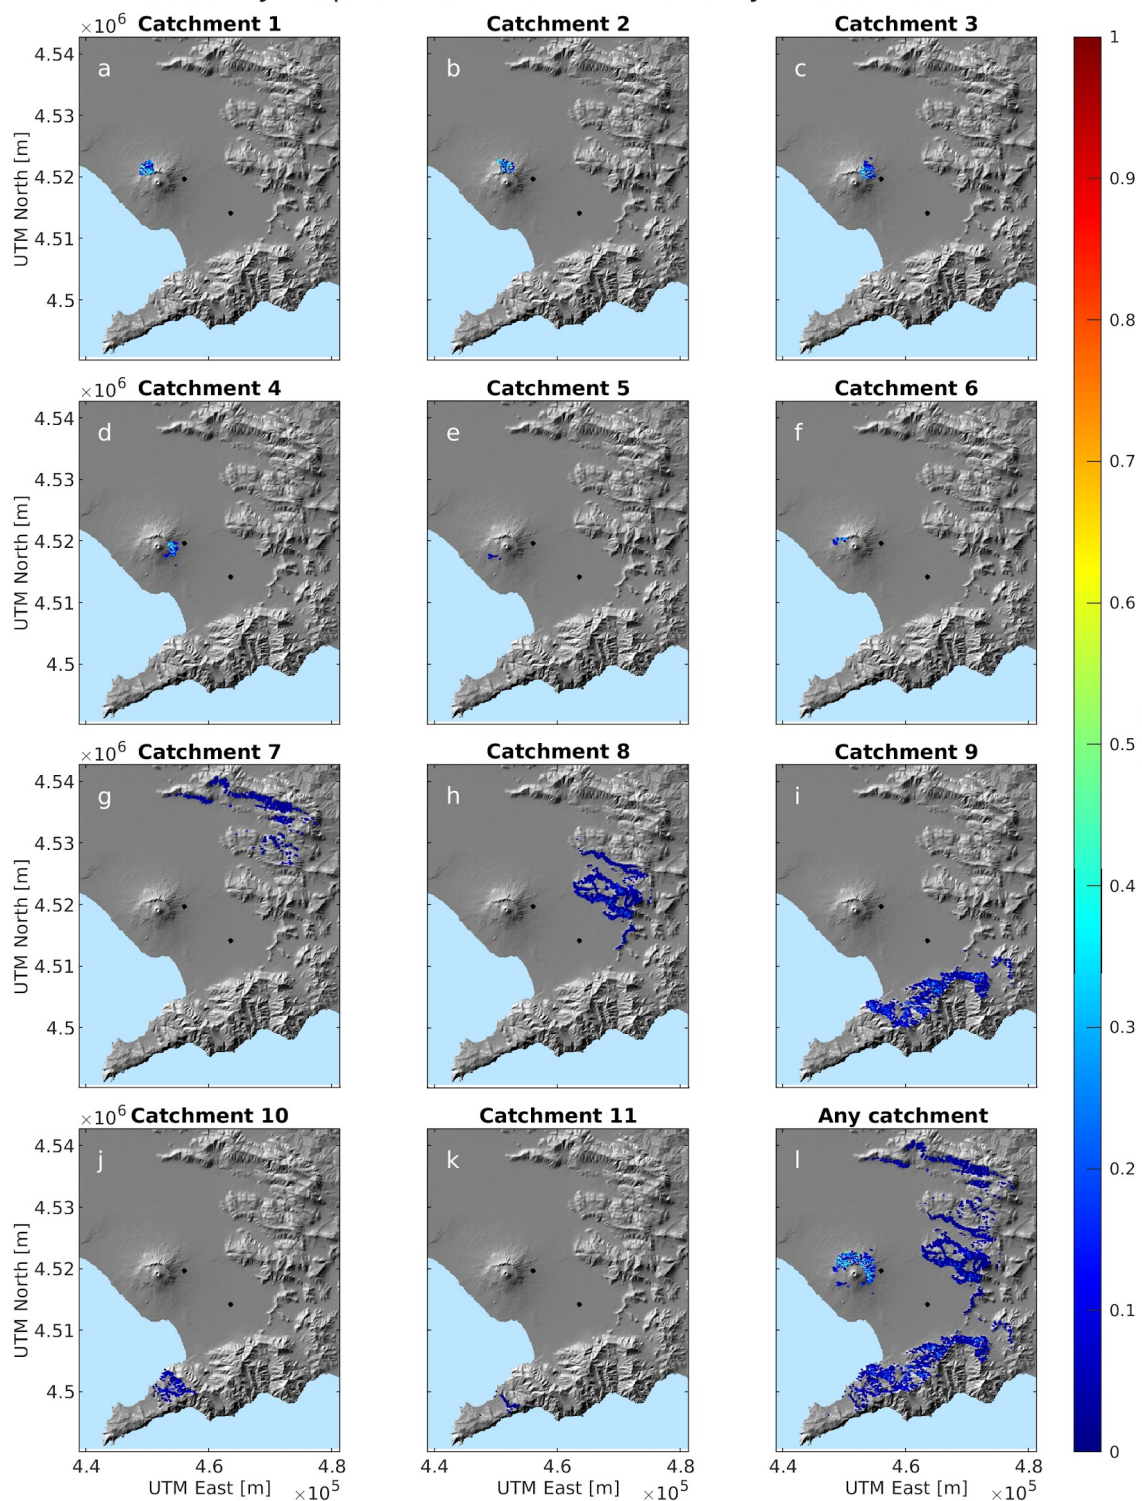

Figure SM53: Probability maps for simultaneously overcoming a maximum flow thickness of 1 m and a dynamic pressure of 30 kPa

Probability map for FlowThick = 2m and DynPress = 0kPa

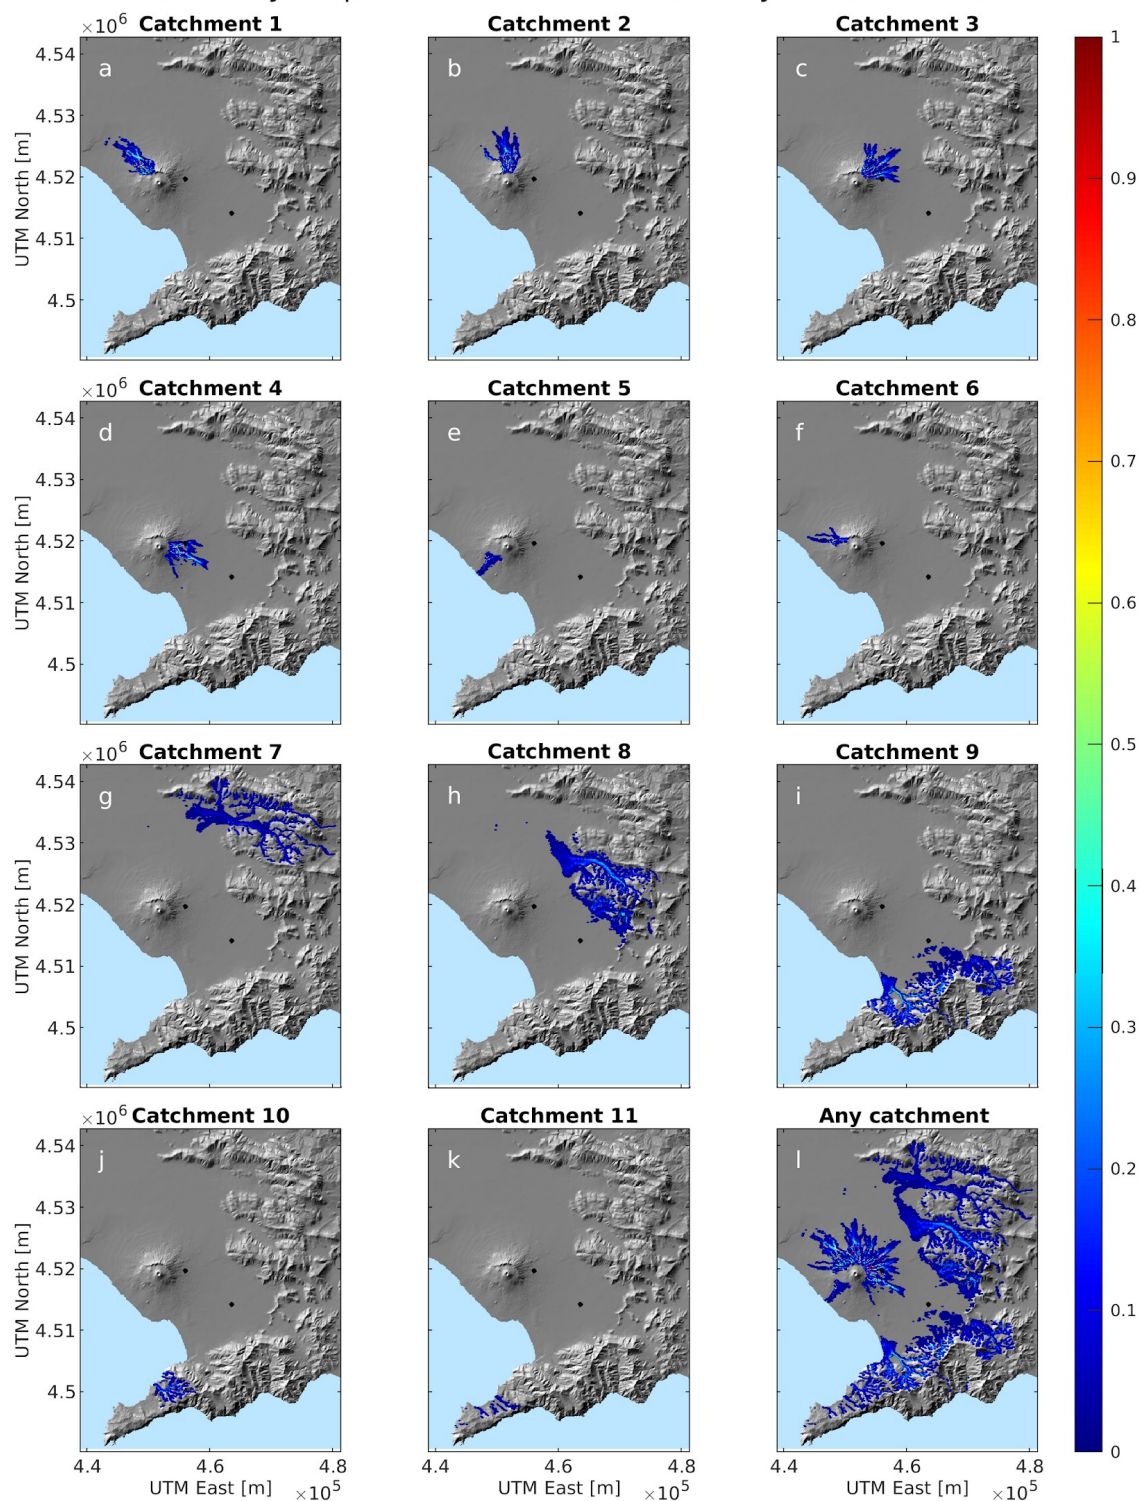

Figure SM54: Probability maps for overcoming a maximum flow thickness of 2 m

Probability map for FlowThick = 2m and DynPress = 0.5kPa

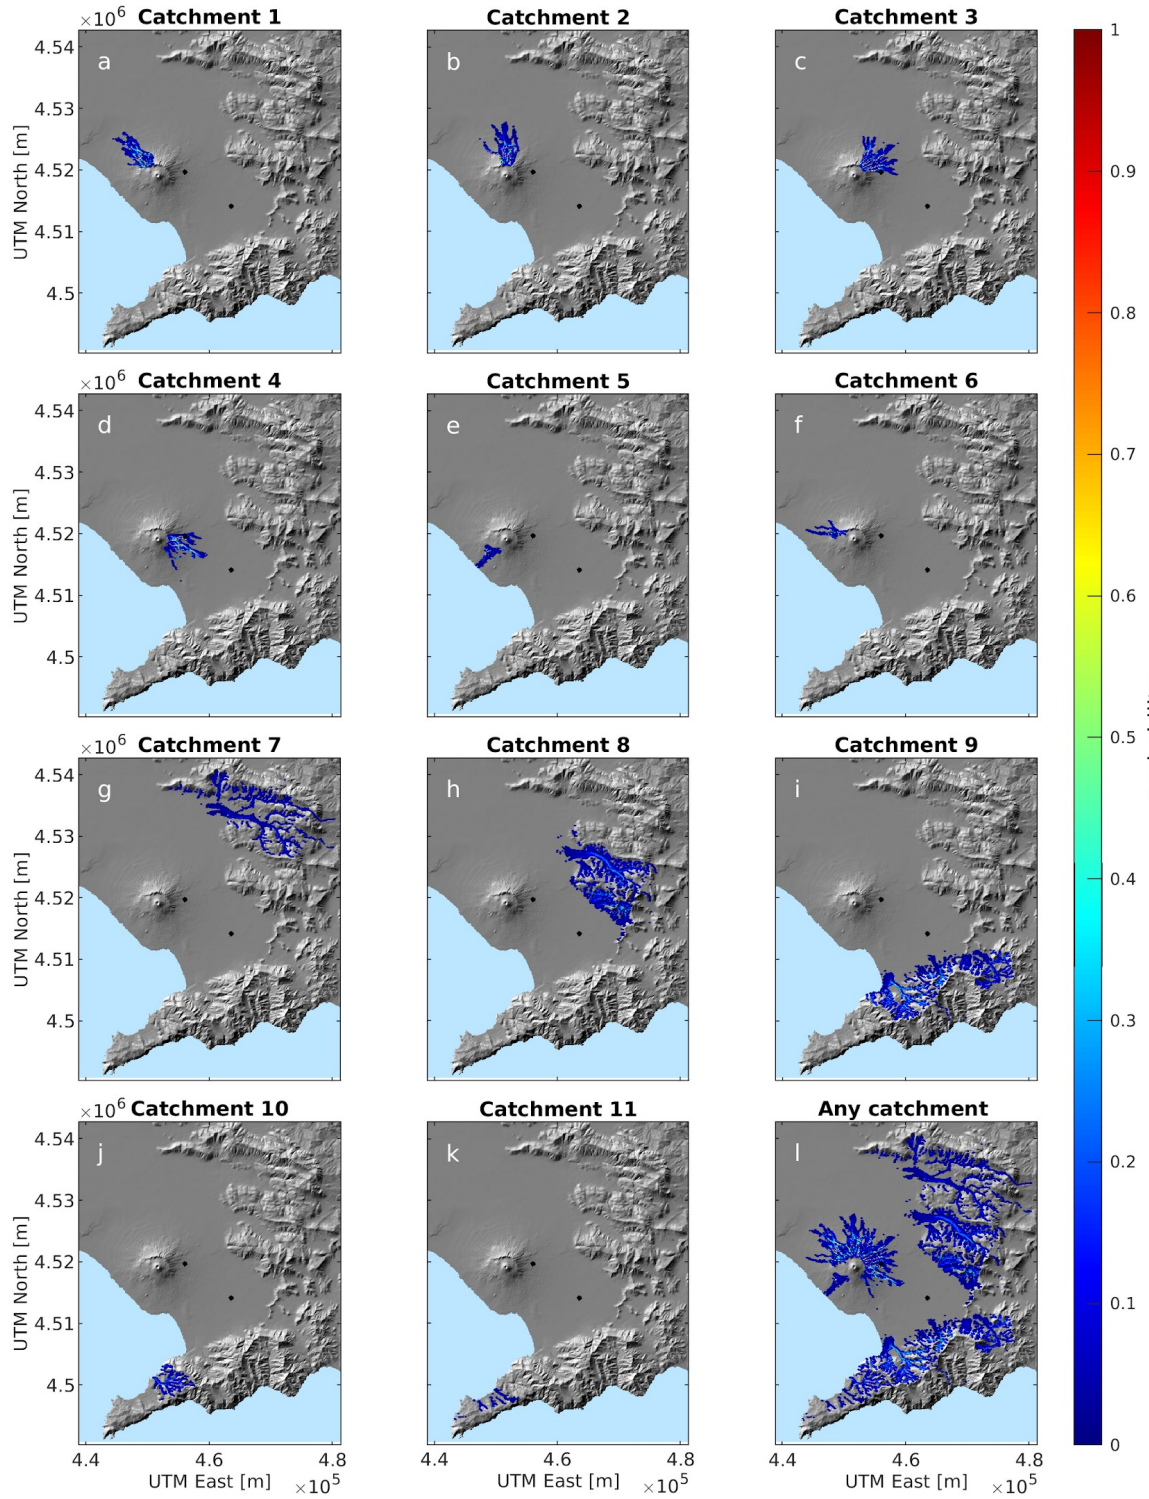

Figure SM55: Probability maps for simultaneously overcoming a maximum flow thickness of 2 m and a dynamic pressure of 0.5 kPa



Probability map for FlowThick = 2m and DynPress = 1kPa

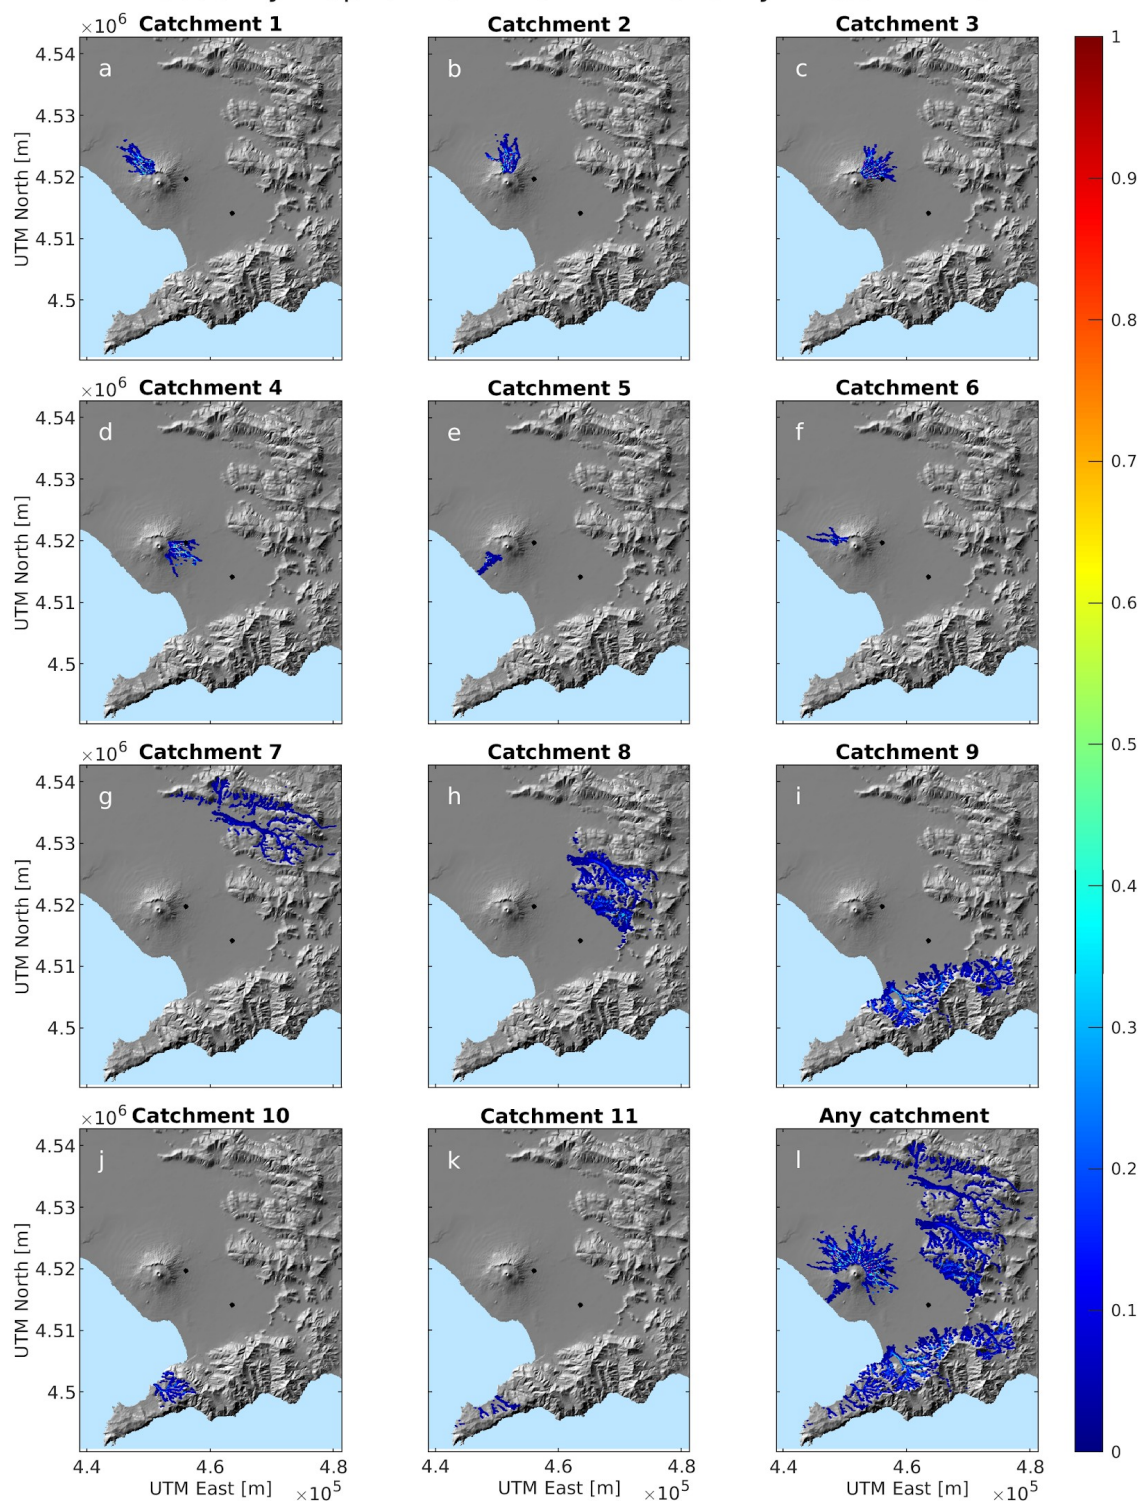

Figure SM56: Probability maps for simultaneously overcoming a maximum flow thickness of 2 m and a dynamic pressure of 1 kPa

Probability map for FlowThick = 2m and DynPress = 2kPa

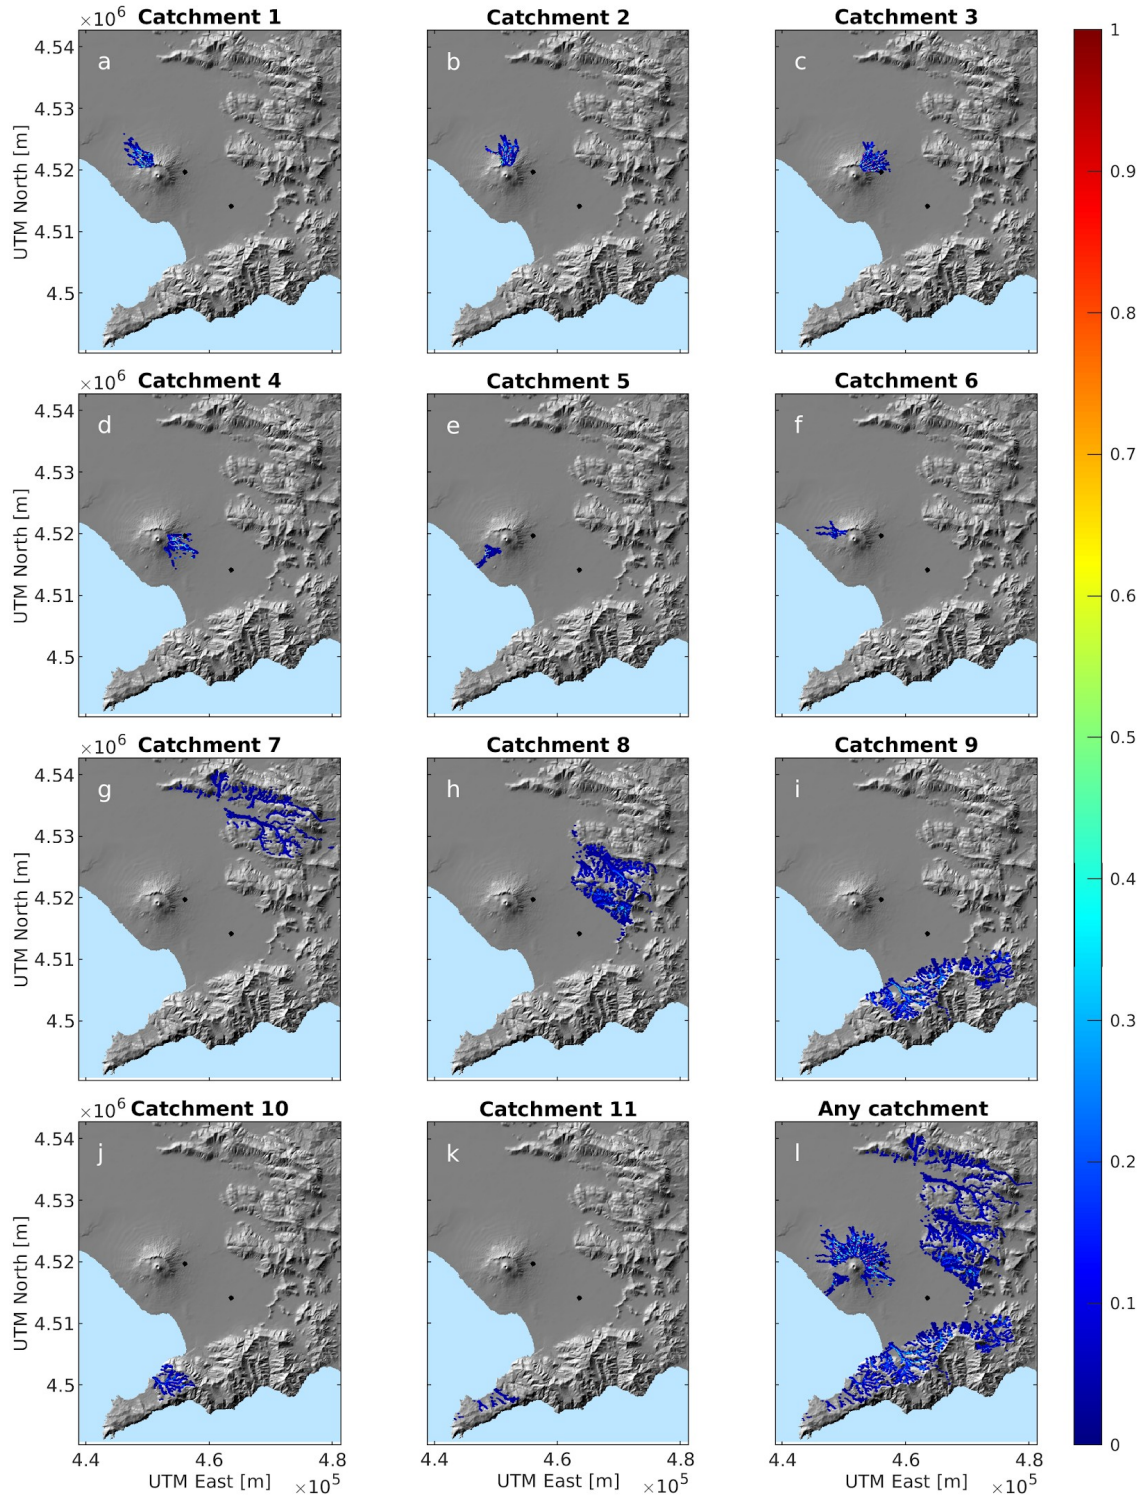

Figure SM57: Probability maps for simultaneously overcoming a maximum flow thickness of 2 m and a dynamic pressure of 2 kPa

Probability map for FlowThick = 2m and DynPress = 5kPa

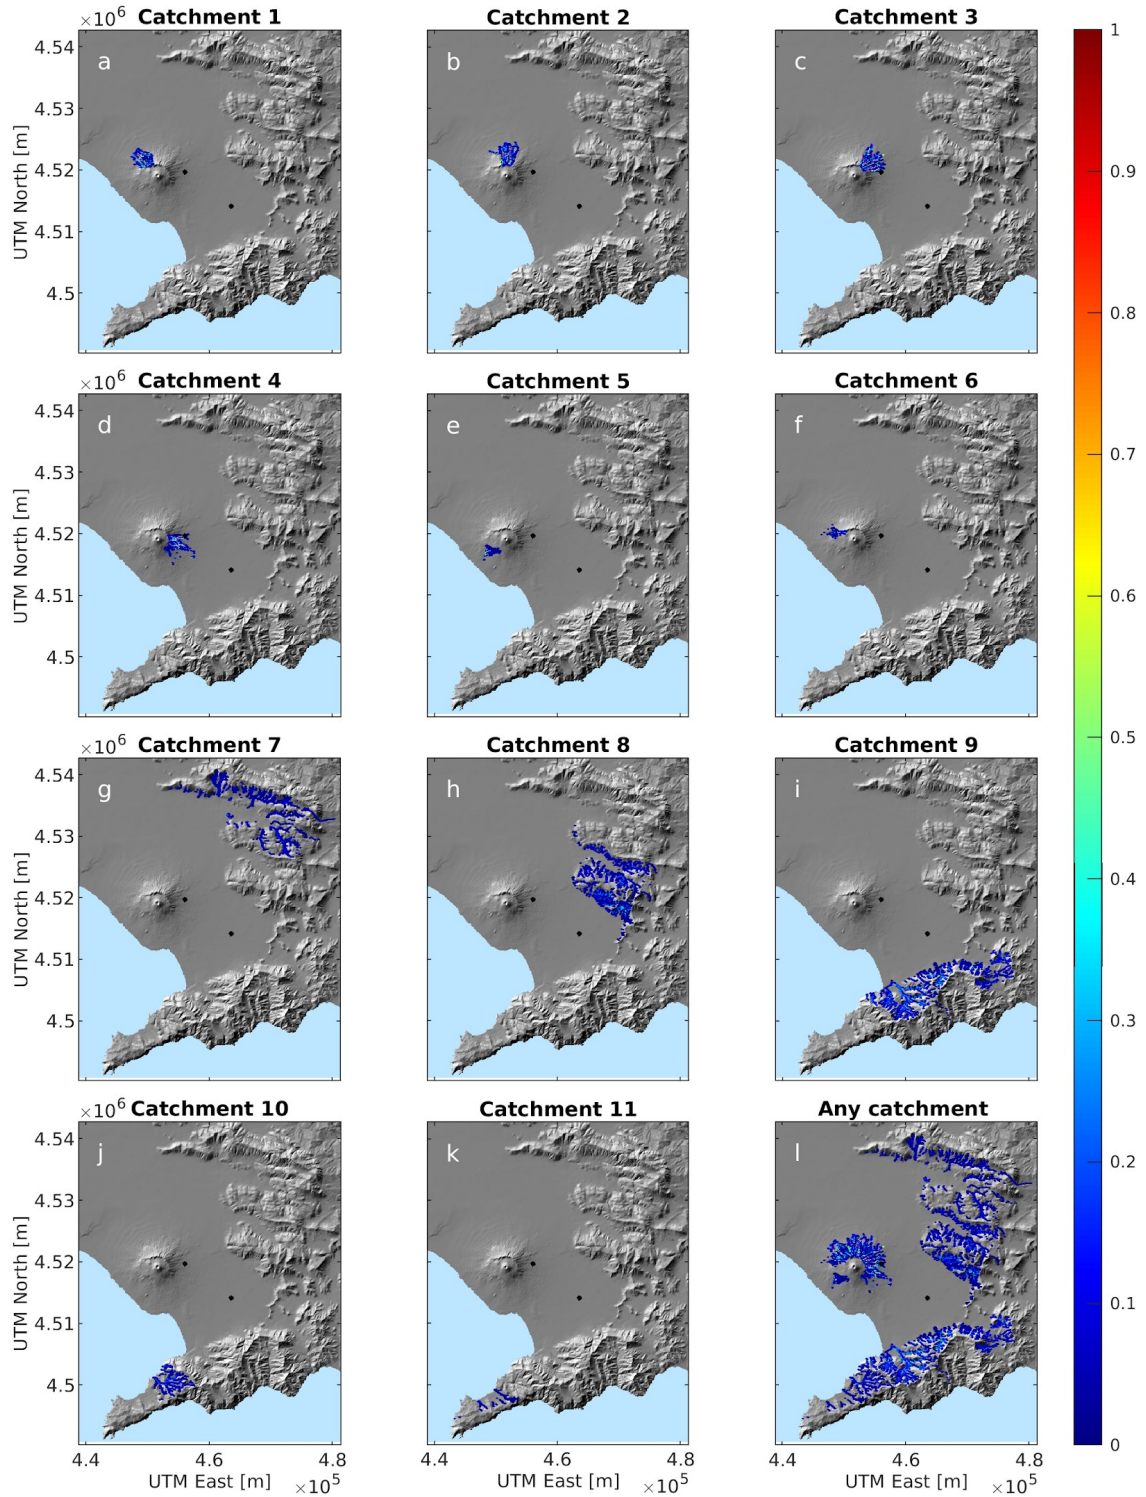

Figure SM58: Probability maps for simultaneously overcoming a maximum flow thickness of 2 m and a dynamic pressure of 5 kPa

Probability map for FlowThick = 2m and DynPress = 30kPa

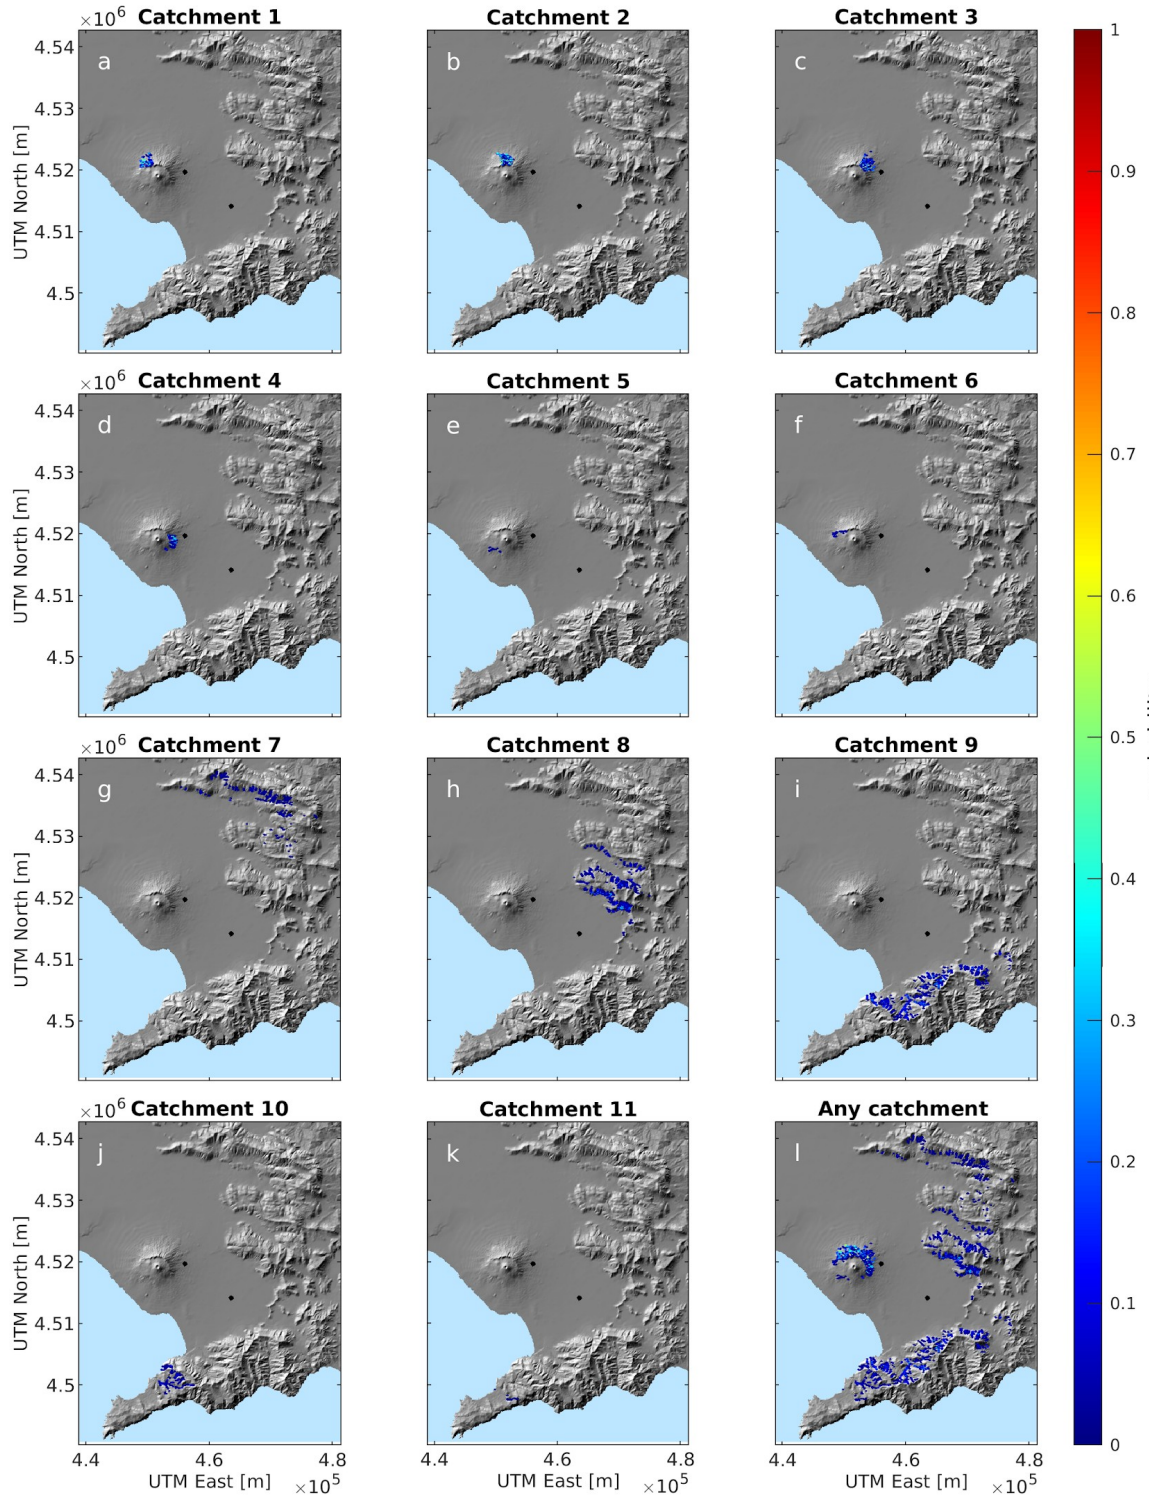

Figure SM59: Probability maps for simultaneously overcoming a maximum flow thickness of 2 m and a dynamic pressure of 30 kPa

Probability map for FlowThick = 5m and DynPress = 0kPa

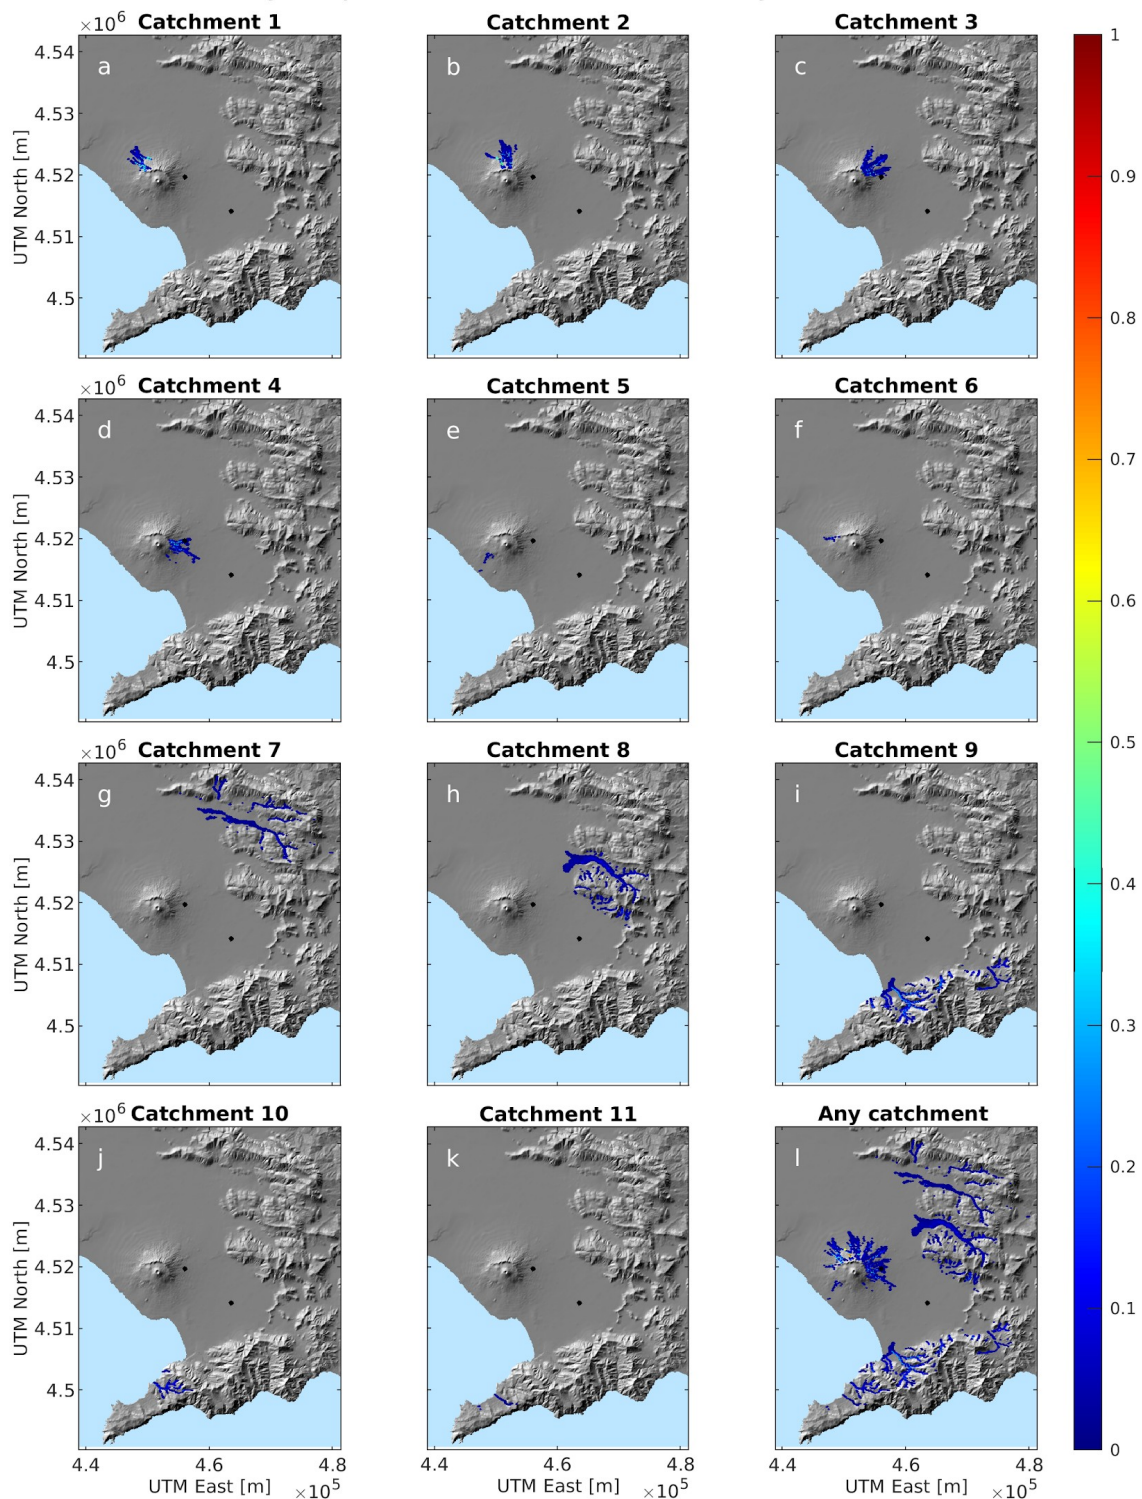

Figure SM60: Probability maps for overcoming a maximum flow thickness of 5 m

Probability map for FlowThick = 5m and DynPress = 0.5kPa

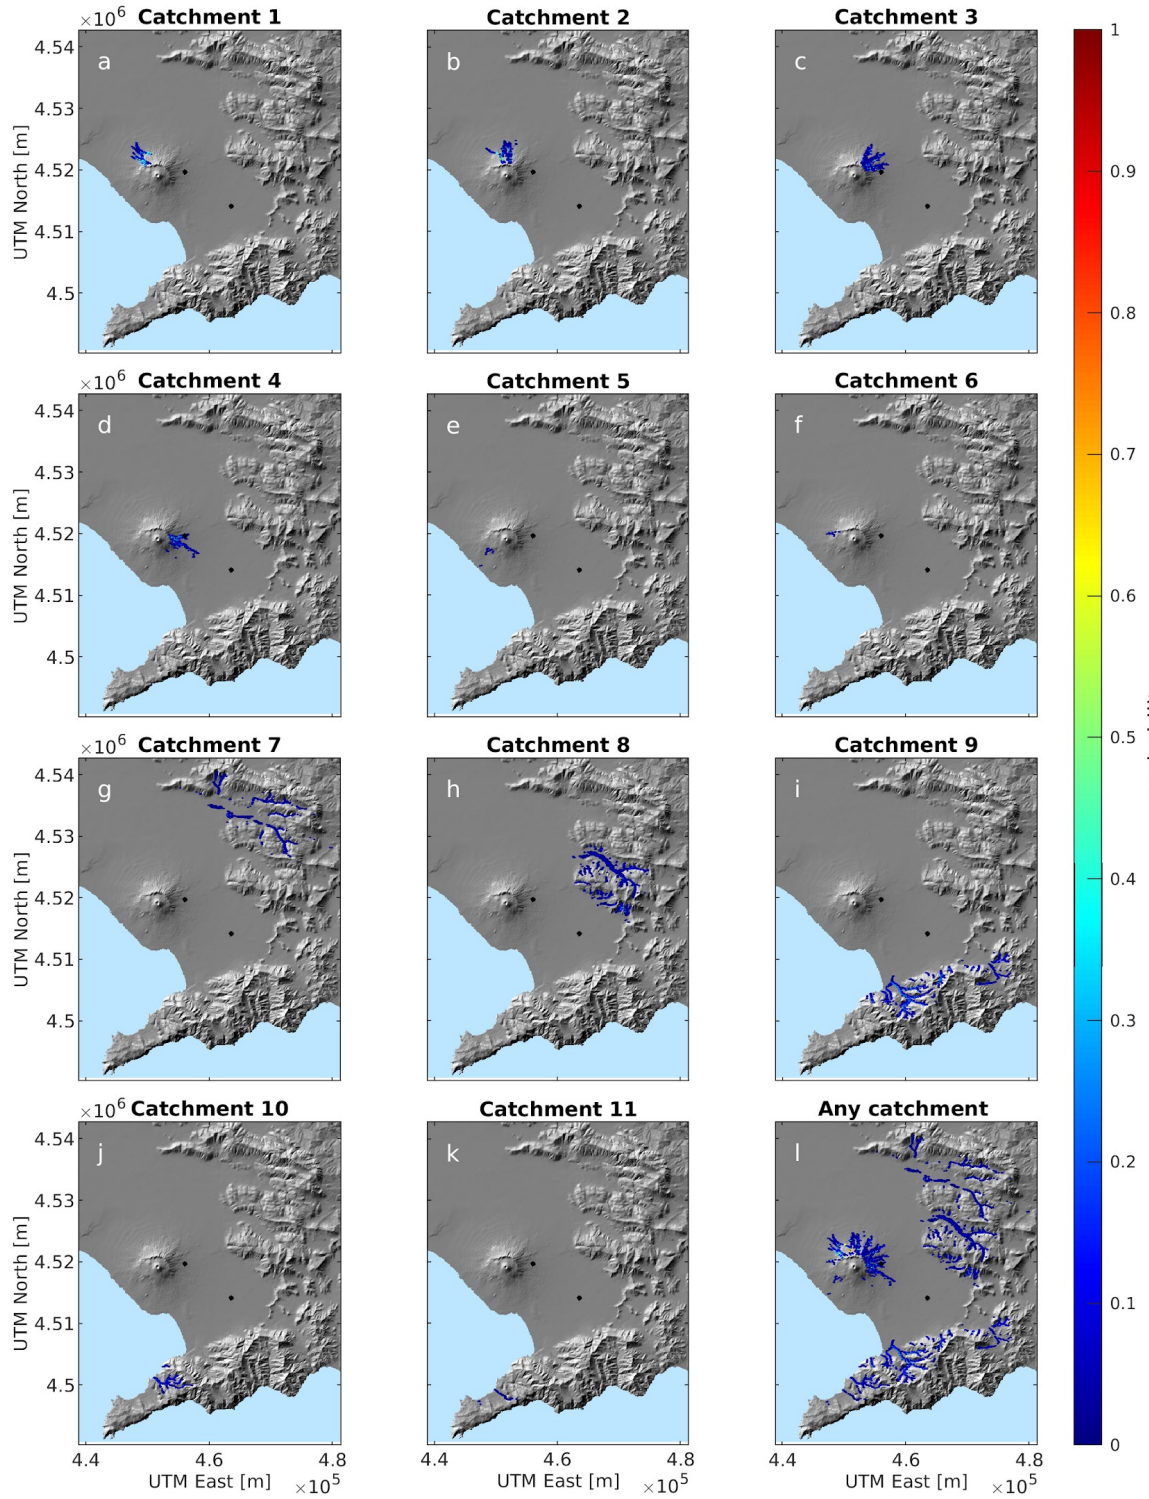

Figure SM61: Probability maps for simultaneously overcoming a maximum flow thickness of 5 m and a dynamic pressure of 0.5 kPa

Probability map for FlowThick = 5m and DynPress = 1kPa

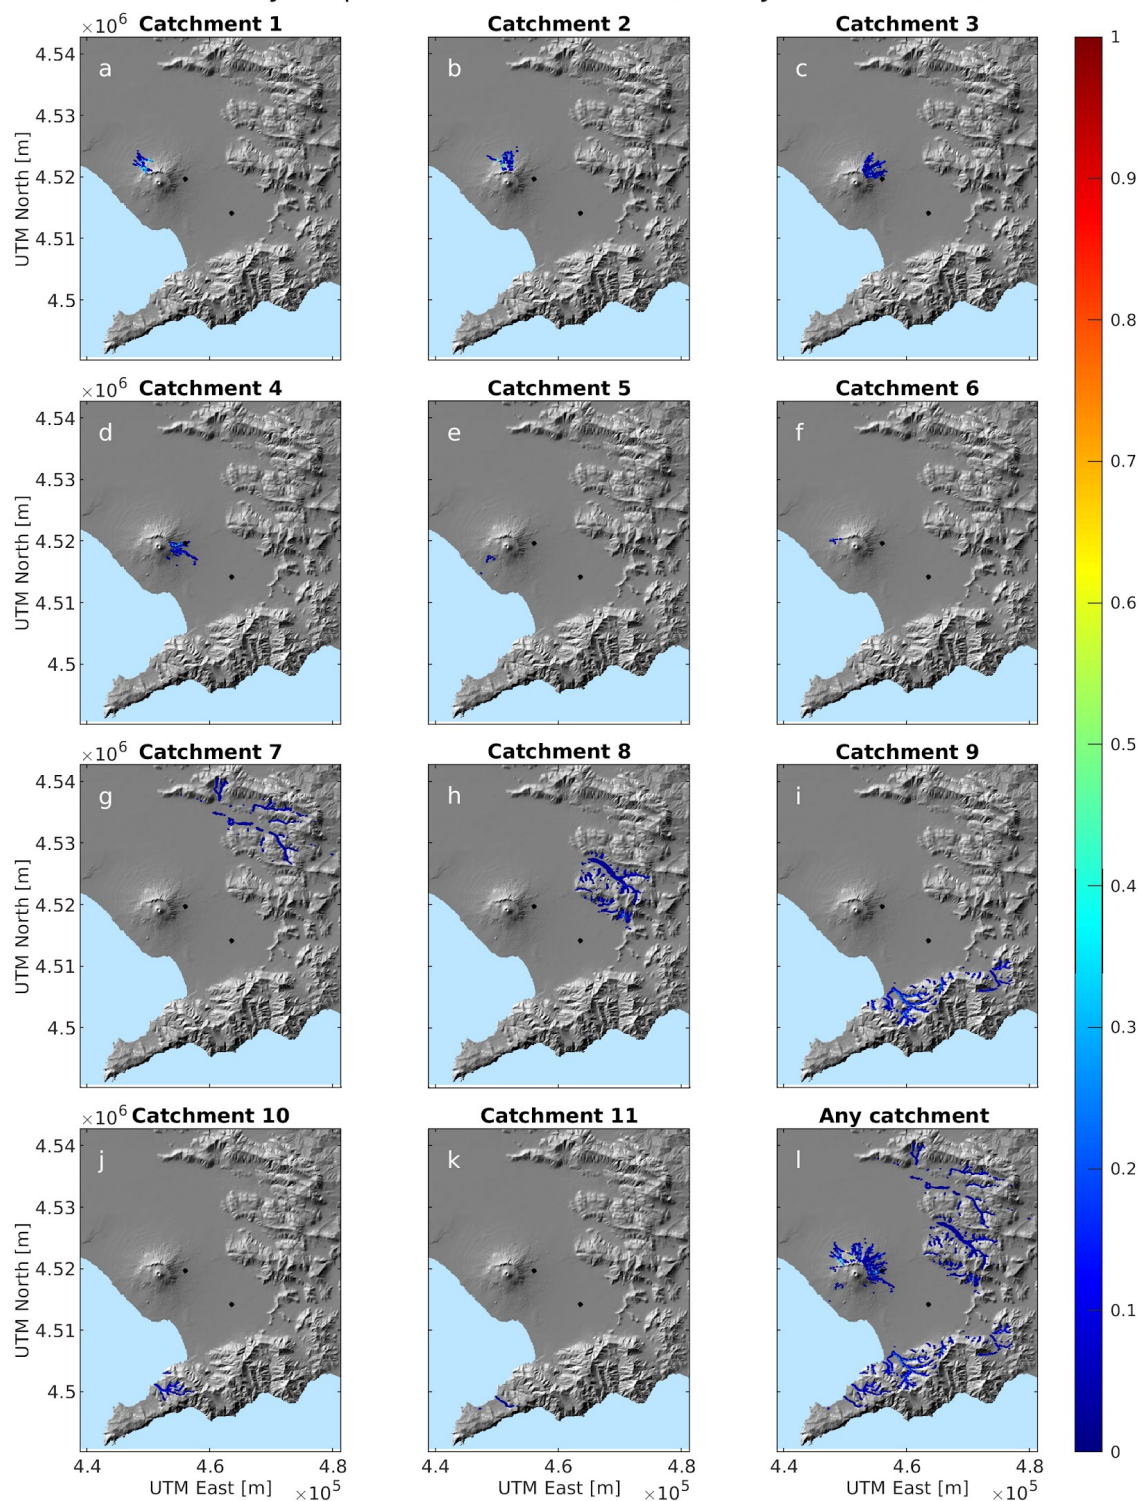

Figure SM62: Probability maps for simultaneously overcoming a maximum flow thickness of 5 m and a dynamic pressure of 1 kPa

Probability map for FlowThick = 5m and DynPress = 2kPa

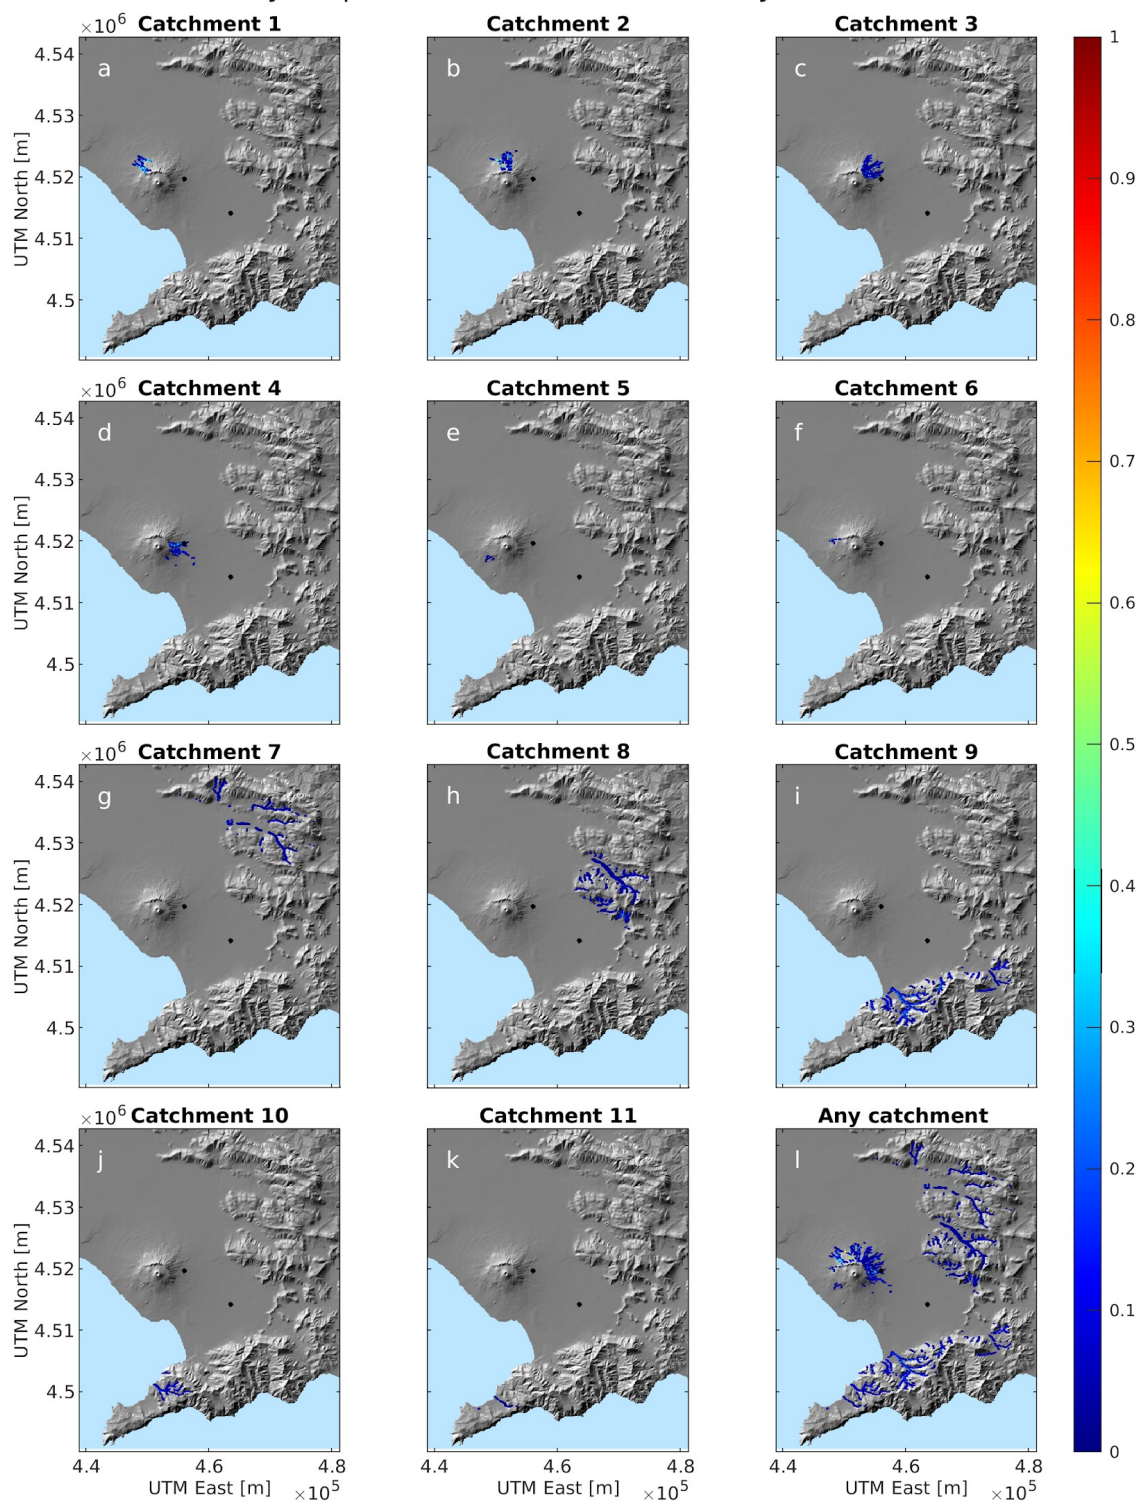

Figure SM63: Probability maps for simultaneously overcoming a maximum flow thickness of 5 m and a dynamic pressure of 2 kPa



Probability map for FlowThick = 5m and DynPress = 5kPa

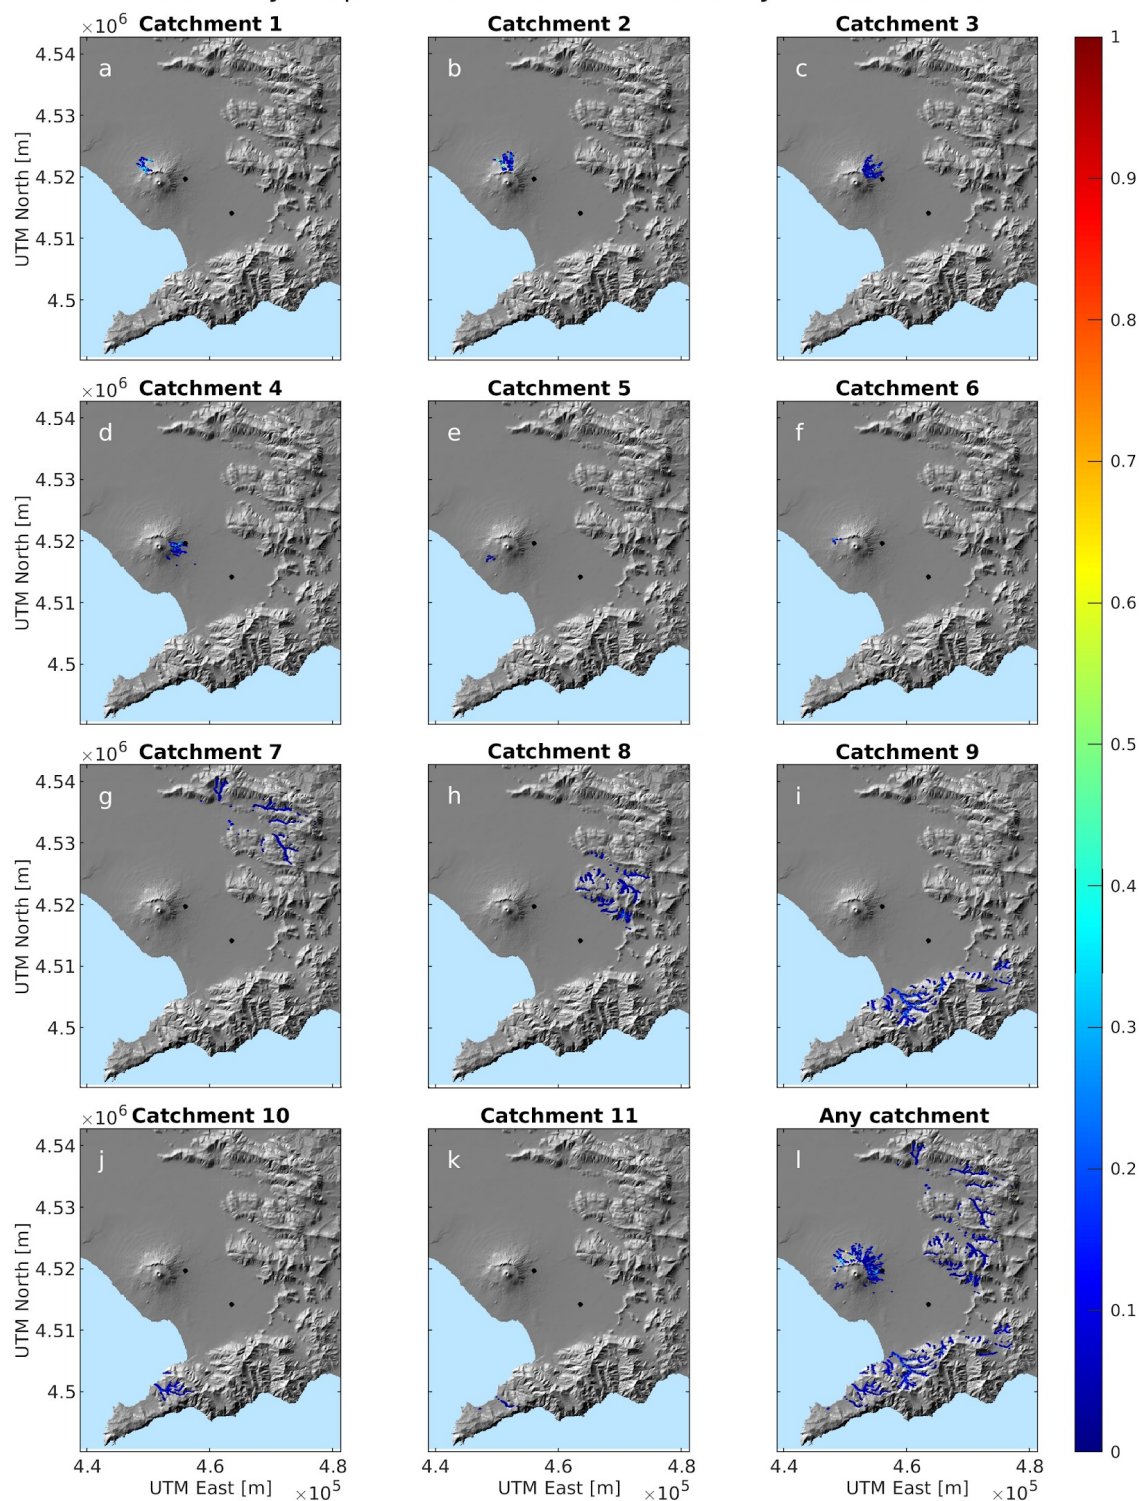

Figure SM64: Probability maps for simultaneously overcoming a maximum flow thickness of 5 m and a dynamic pressure of 5 kPa

Probability map for FlowThick = 5m and DynPress = 30kPa

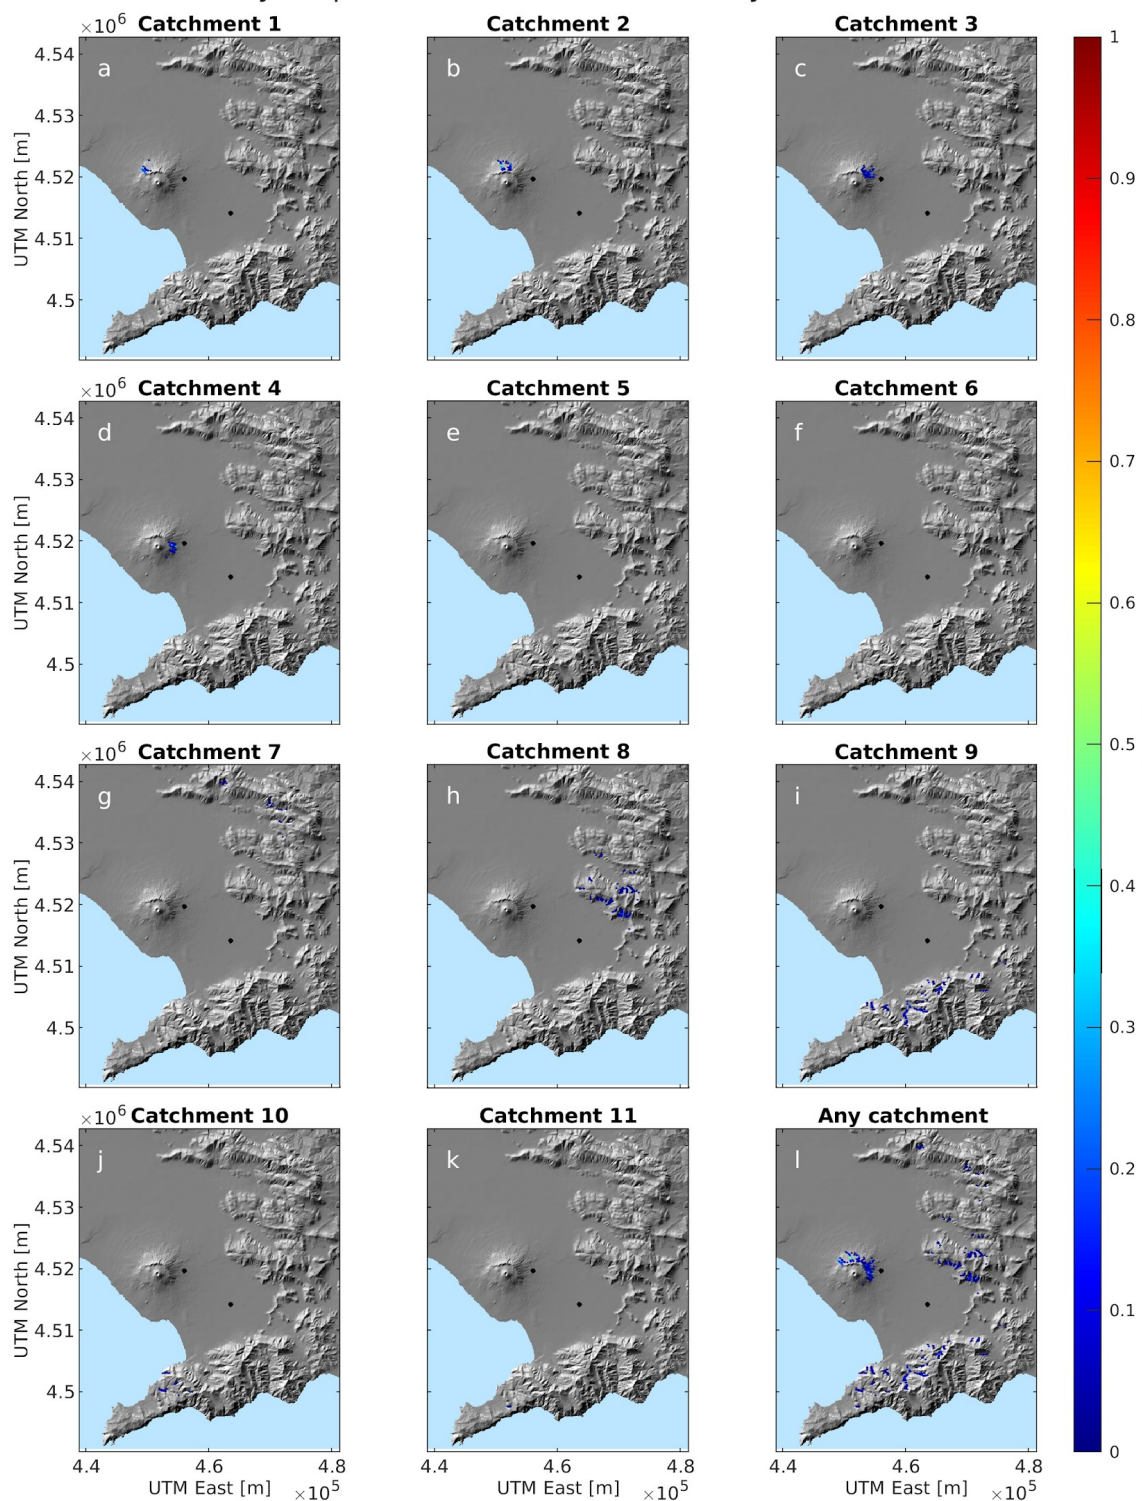

Figure SM: Probability maps for simultaneously overcoming a maximum flow thickness of 5 m and a dynamic pressure of 30 kPa
